# Supplementary material for: Study of the stereoselectivity of 2-azido-2-deoxyglucosyl donors: protecting group effects
Source: Royal Society of Chemistry journal article supplement (doi:10.1039/c3ob26994a), 2013-01-01

COMPOUND 2 PROTON.ESP

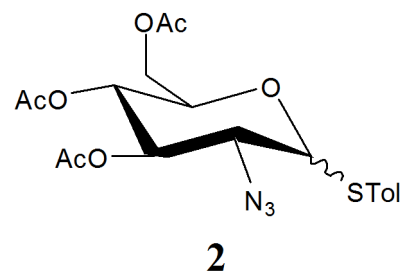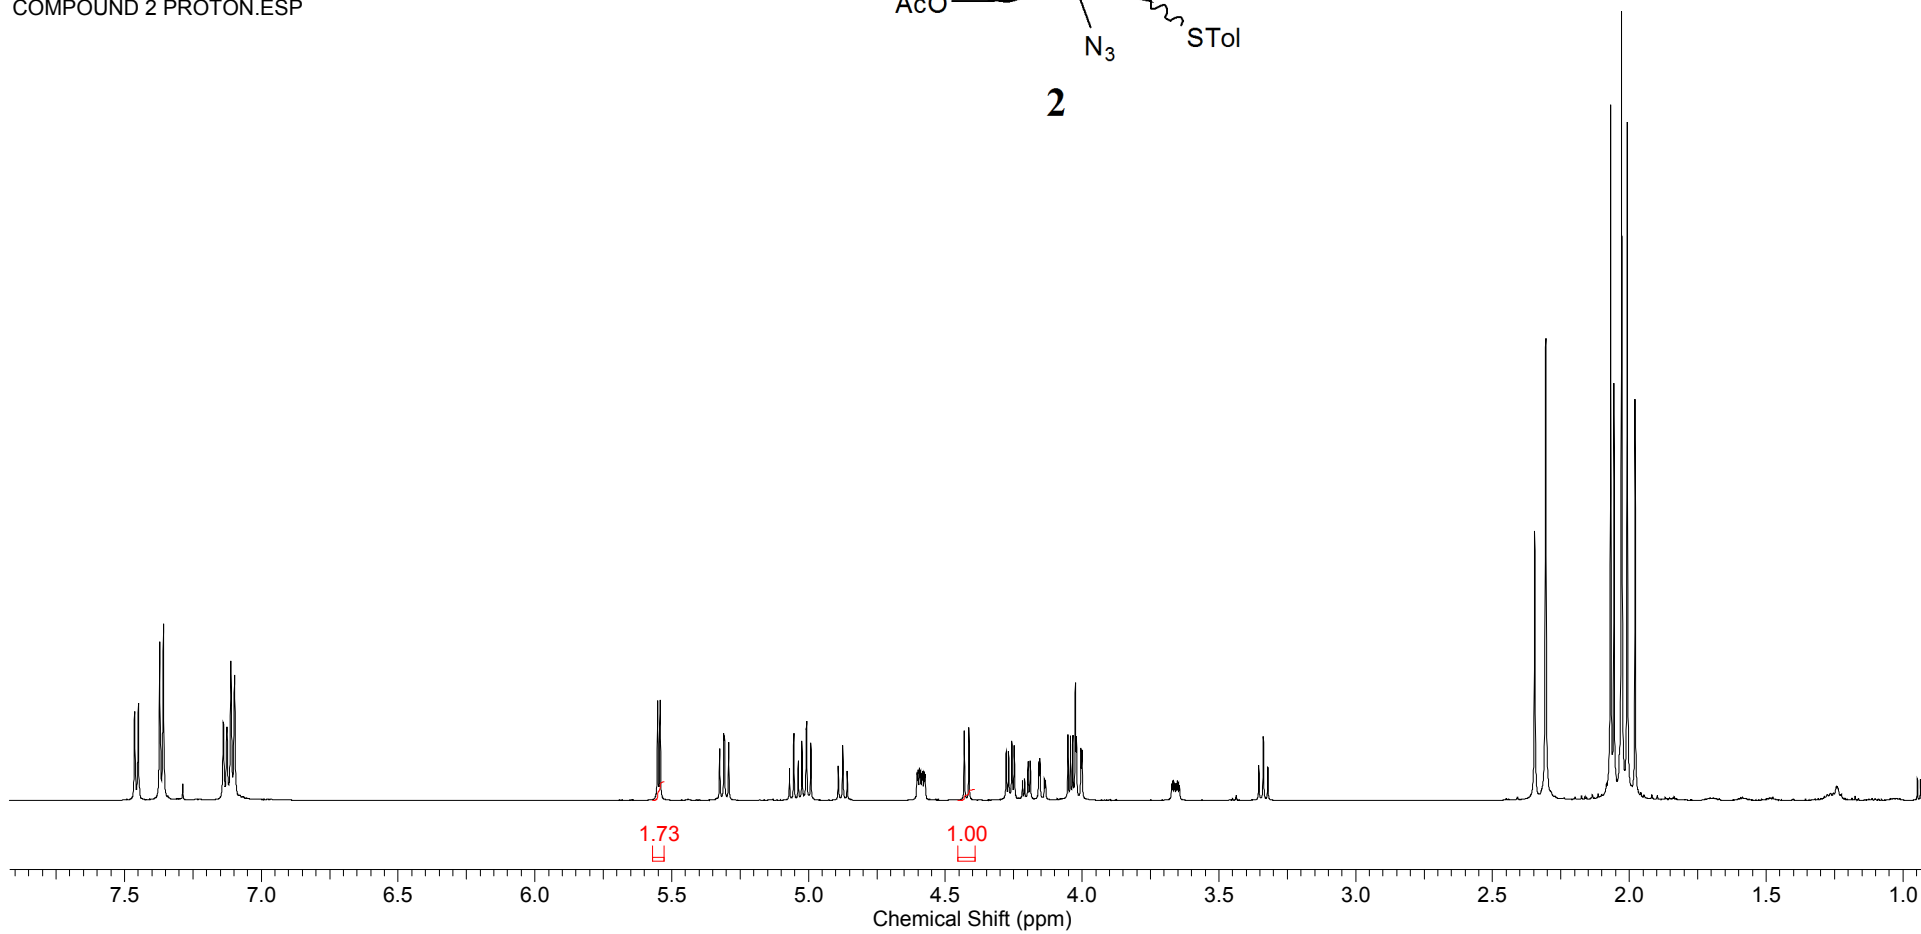

Compound 2 Carbon.esp

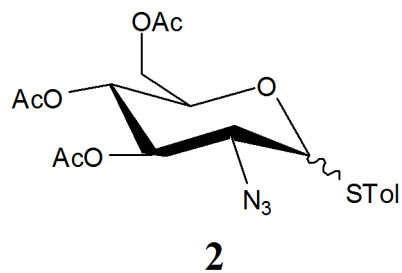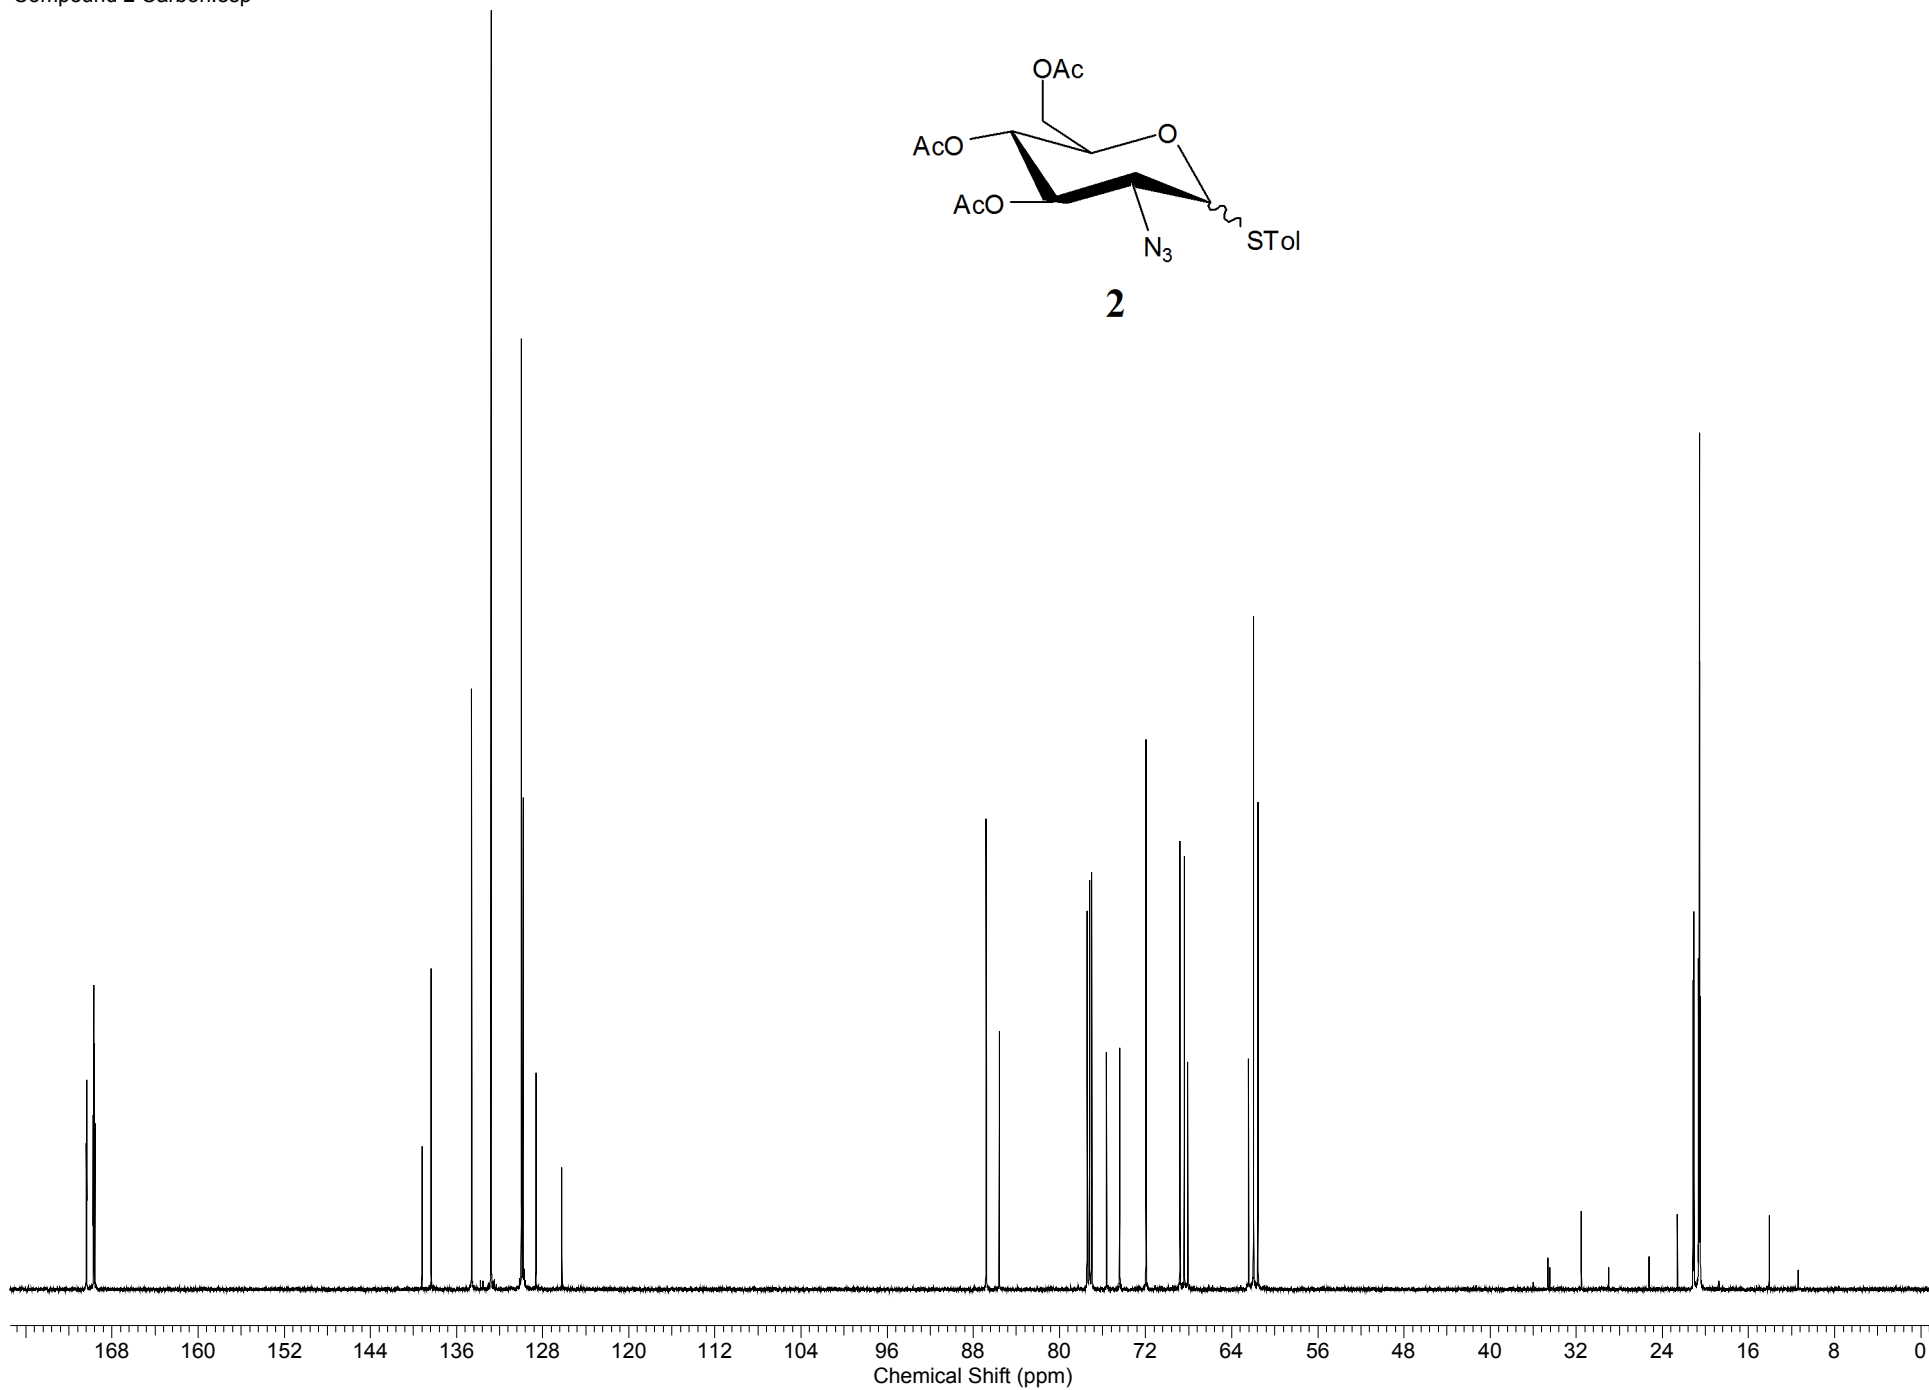

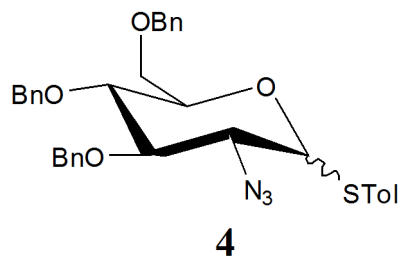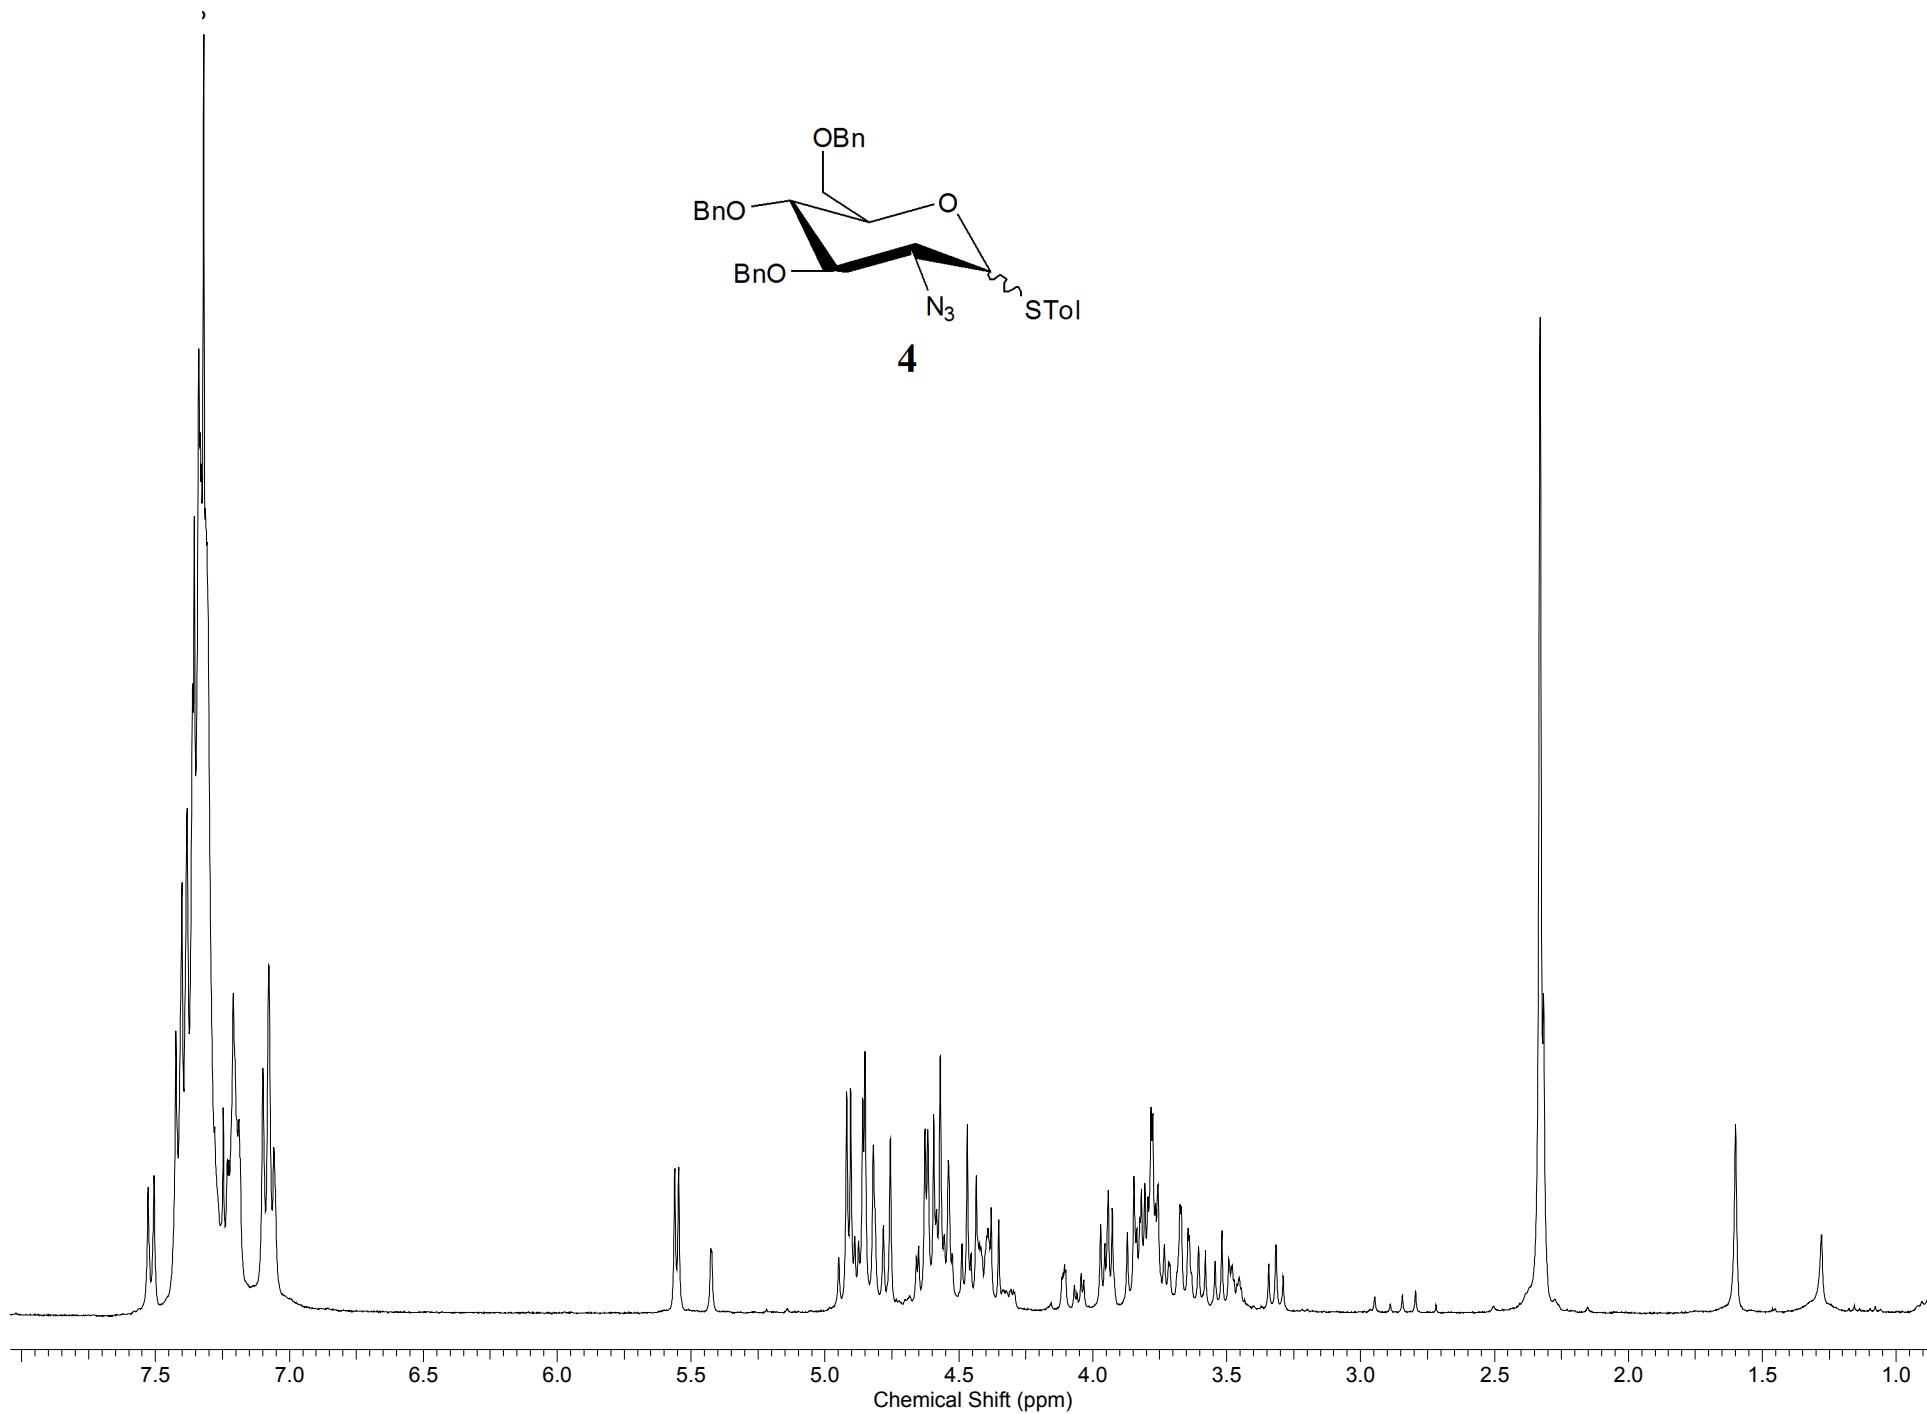

COMPOUND 4 CARBON.ESP

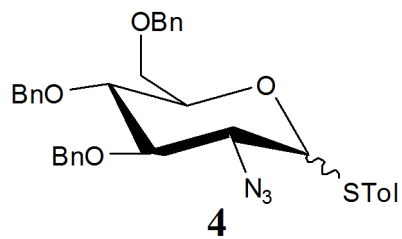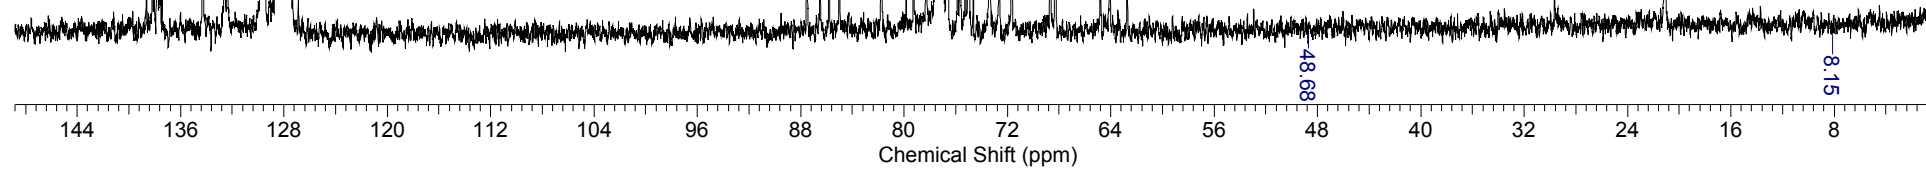

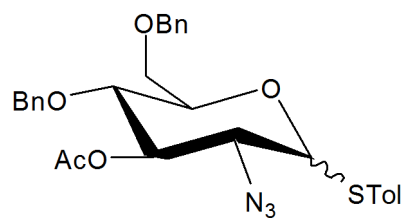

COMPOUND 8 PROTON.ESP

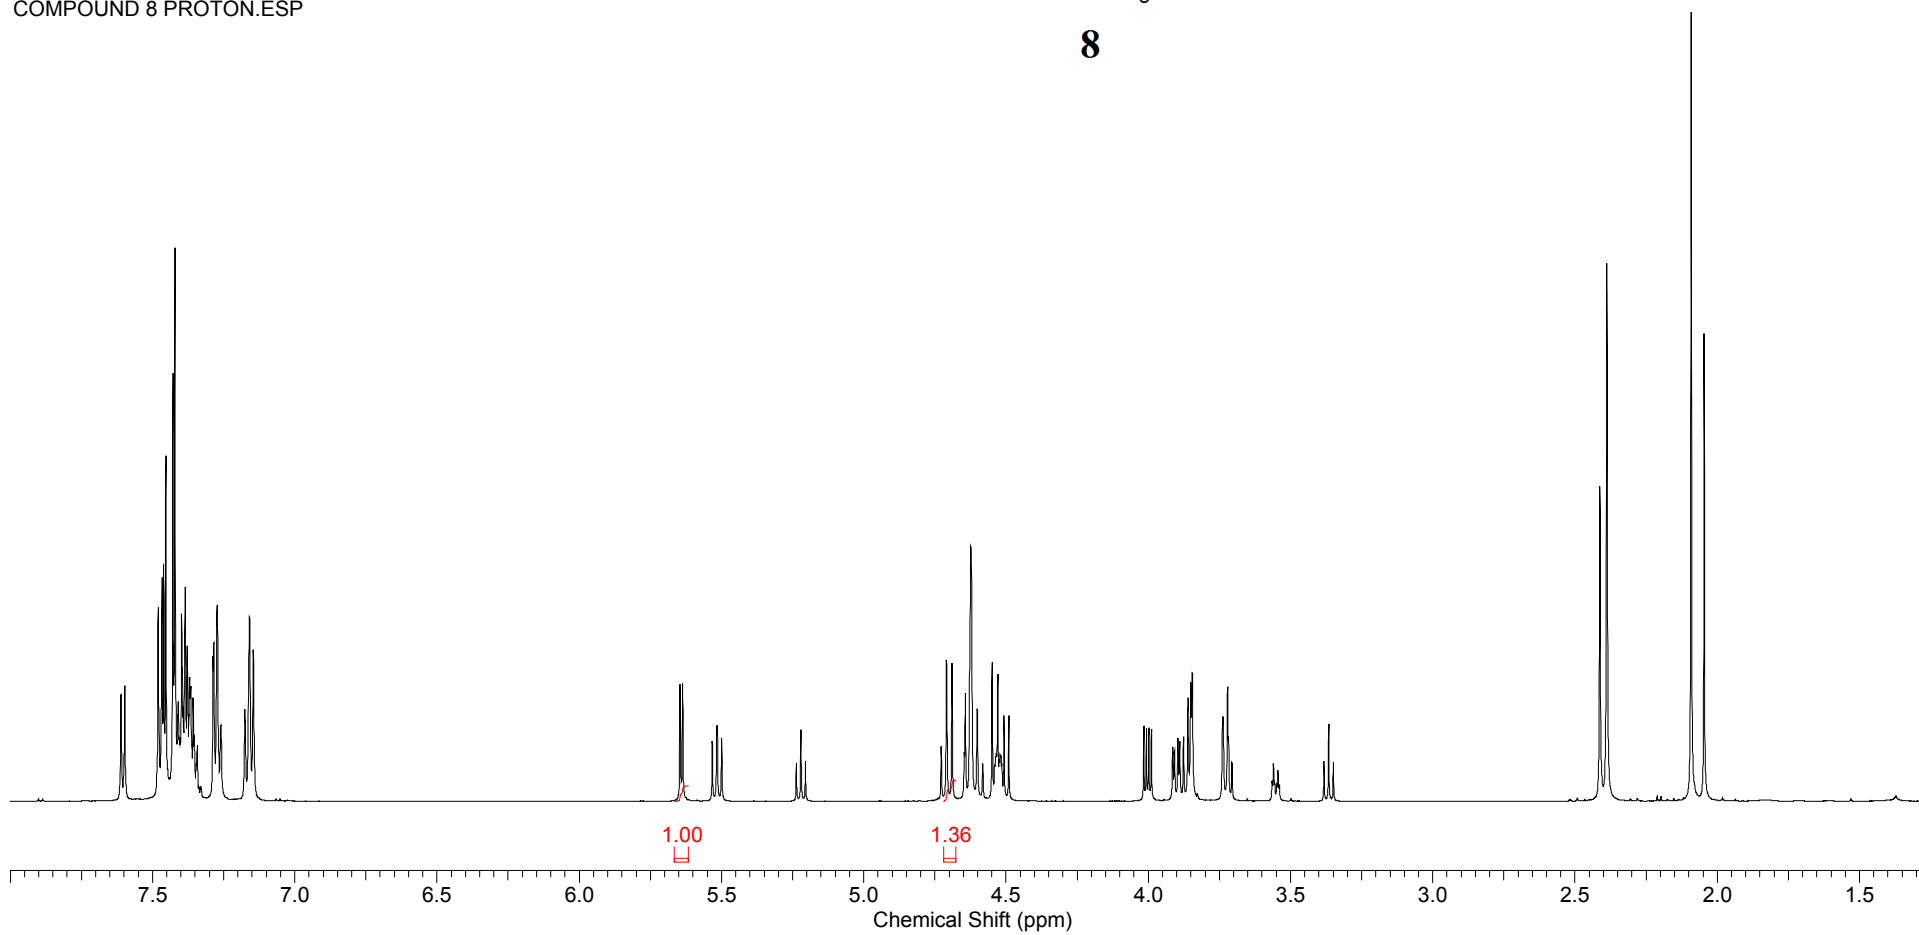

Compound 8 carbon.esp

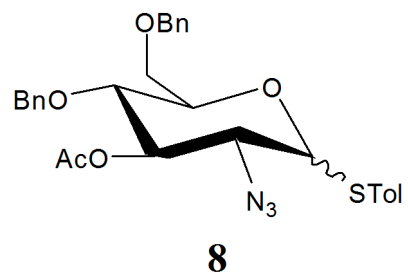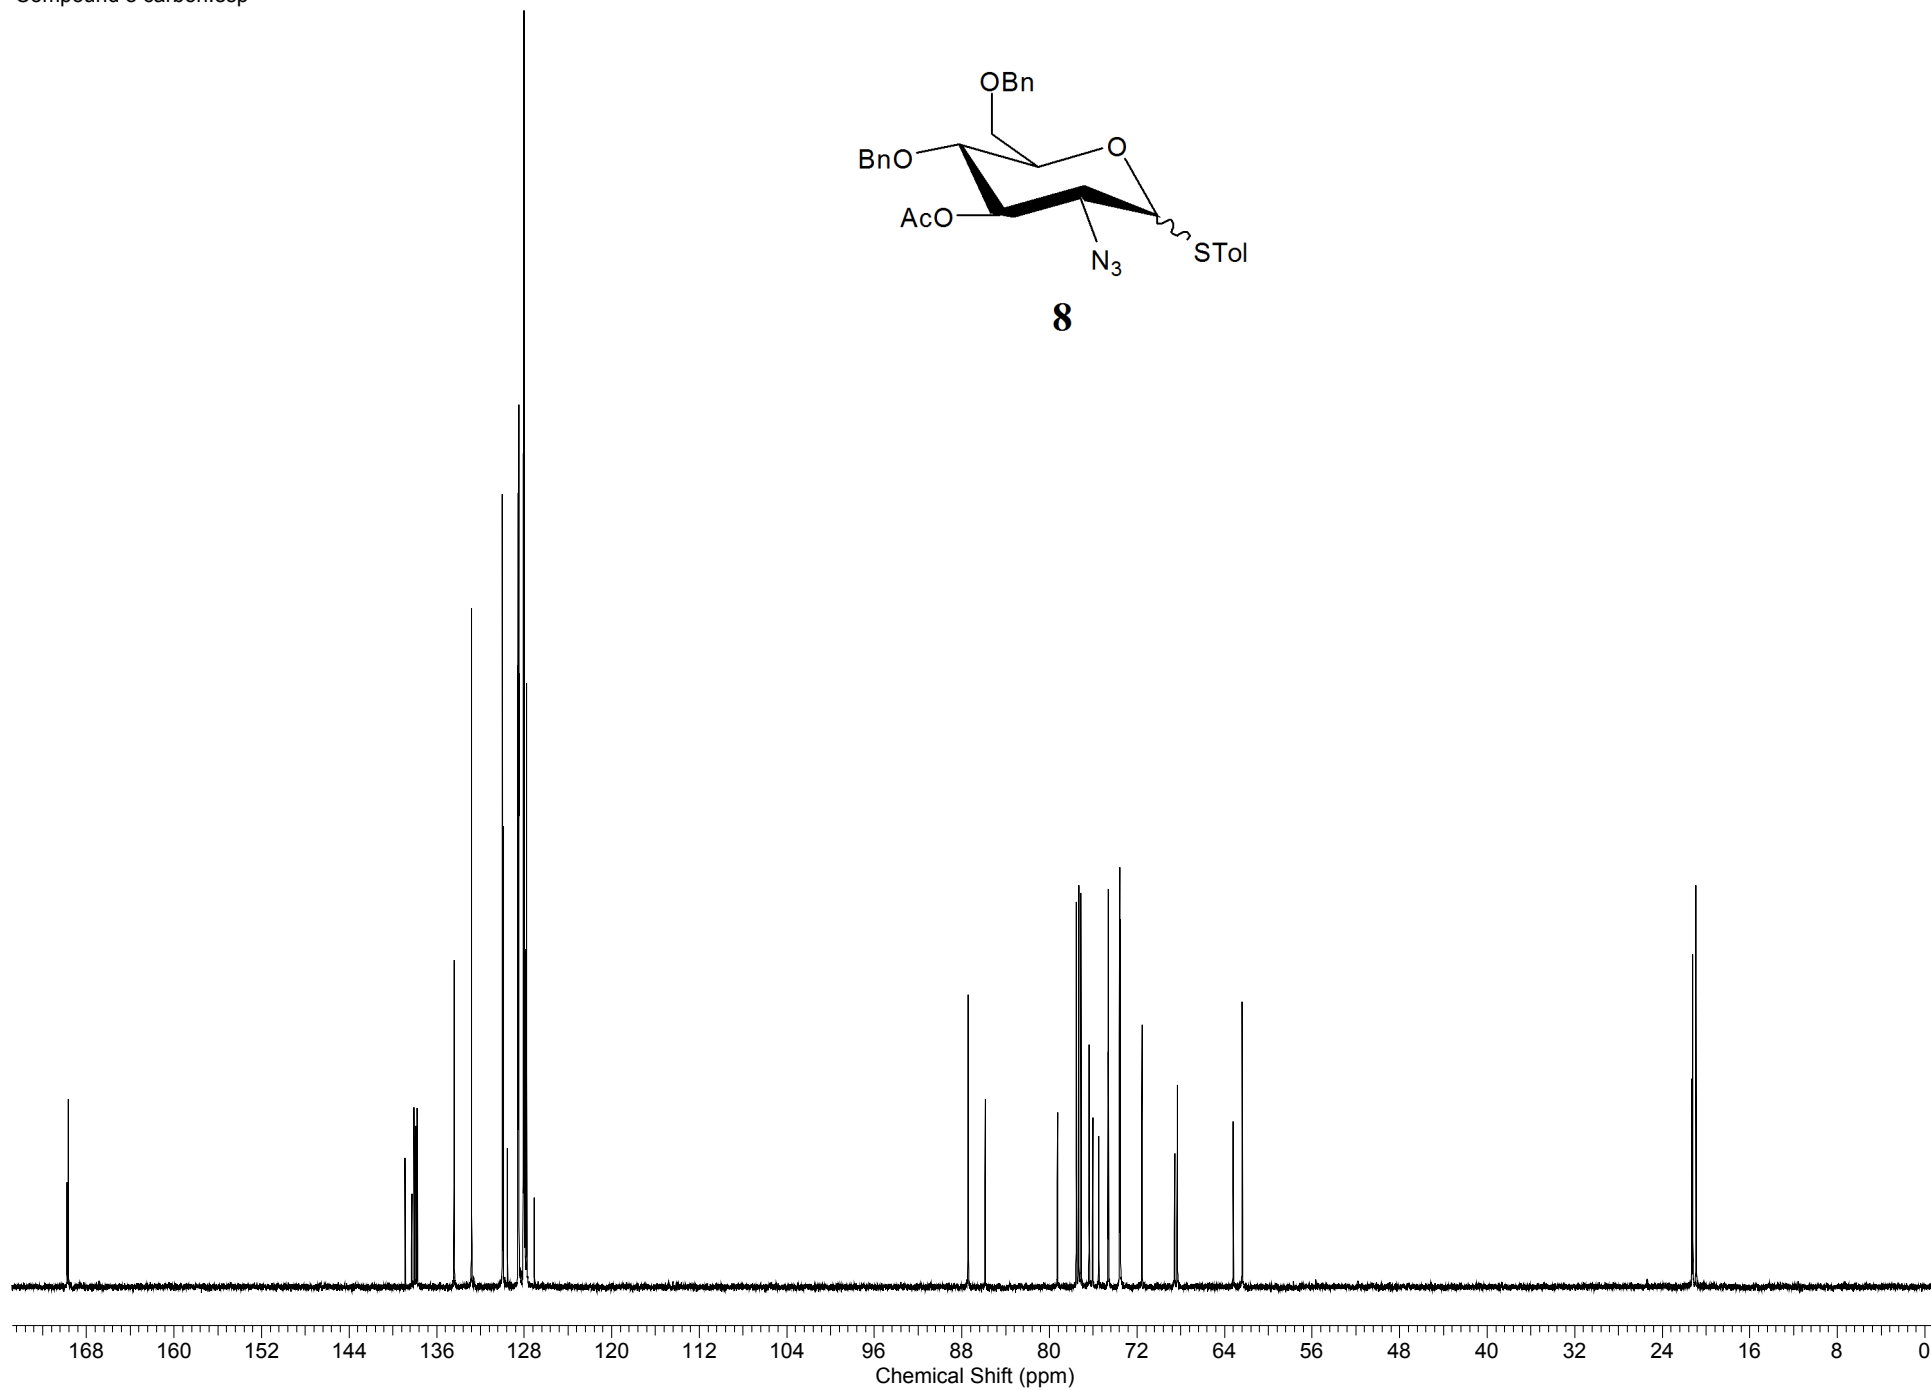

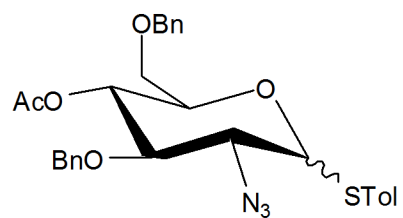

**11**

Compound 11 proton.esp

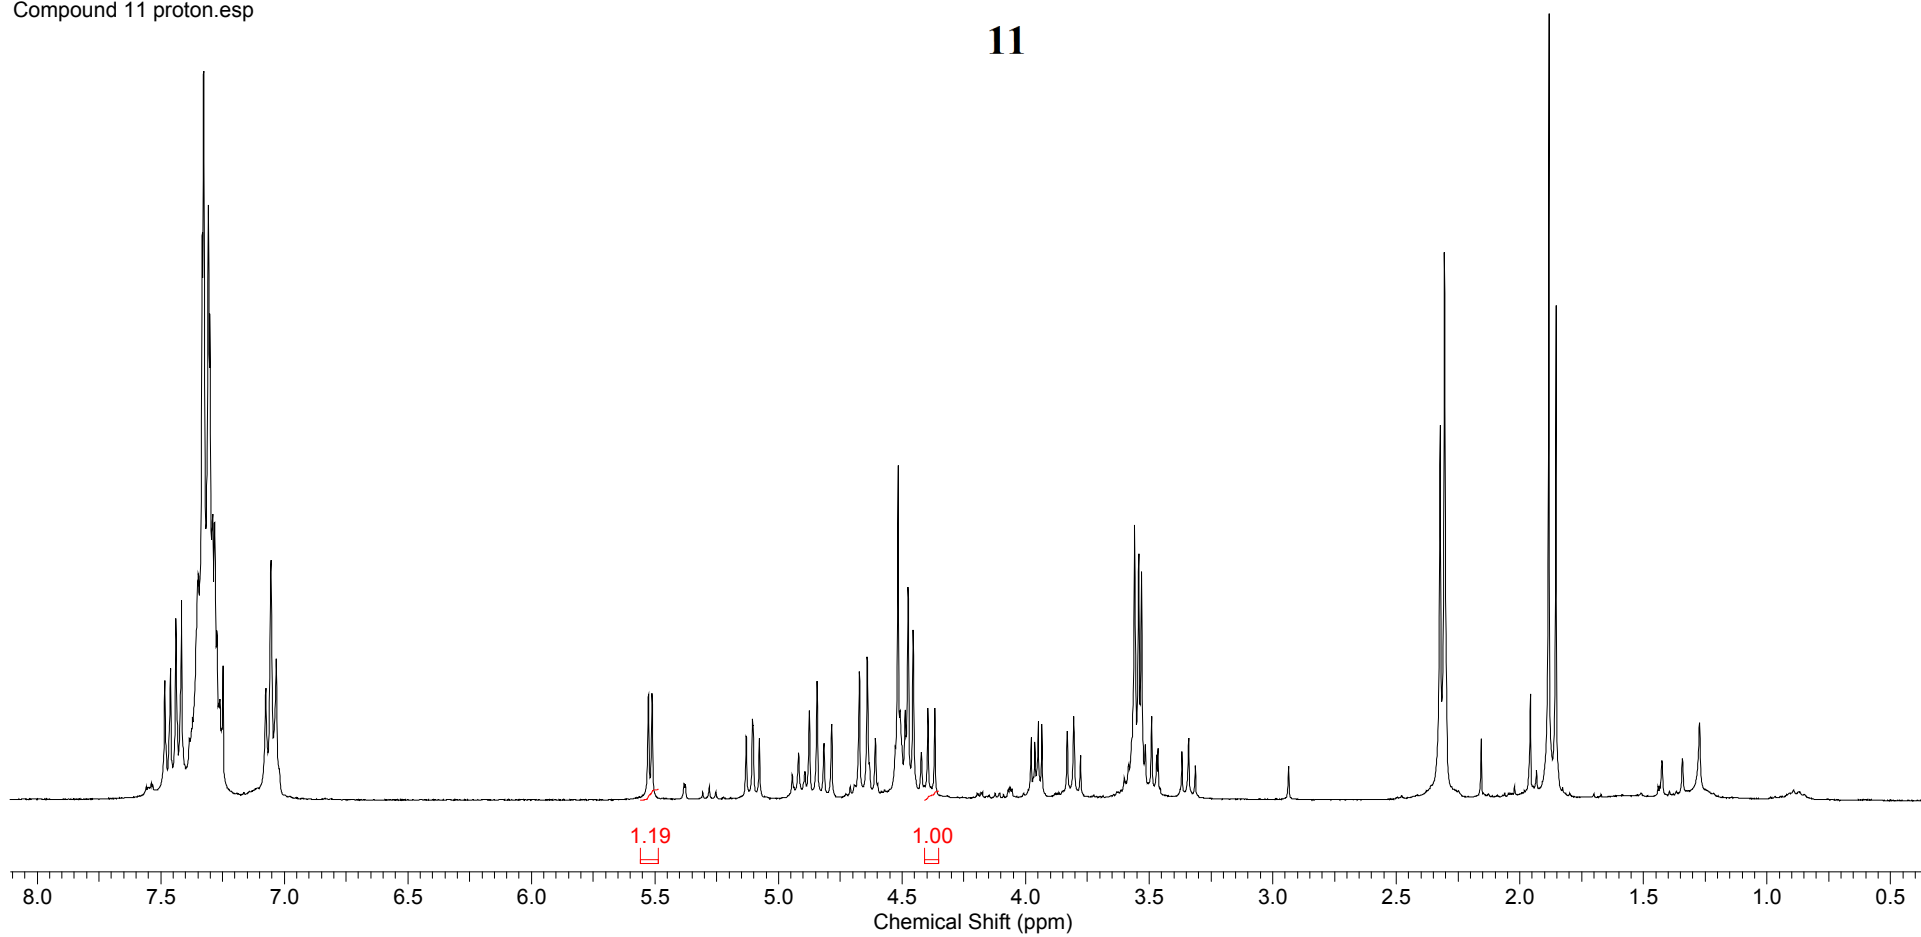

Compound 11 carbon.esp

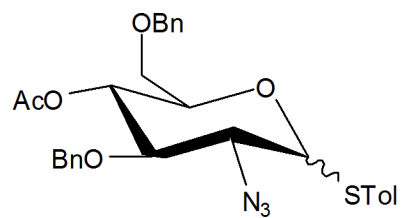

**11**

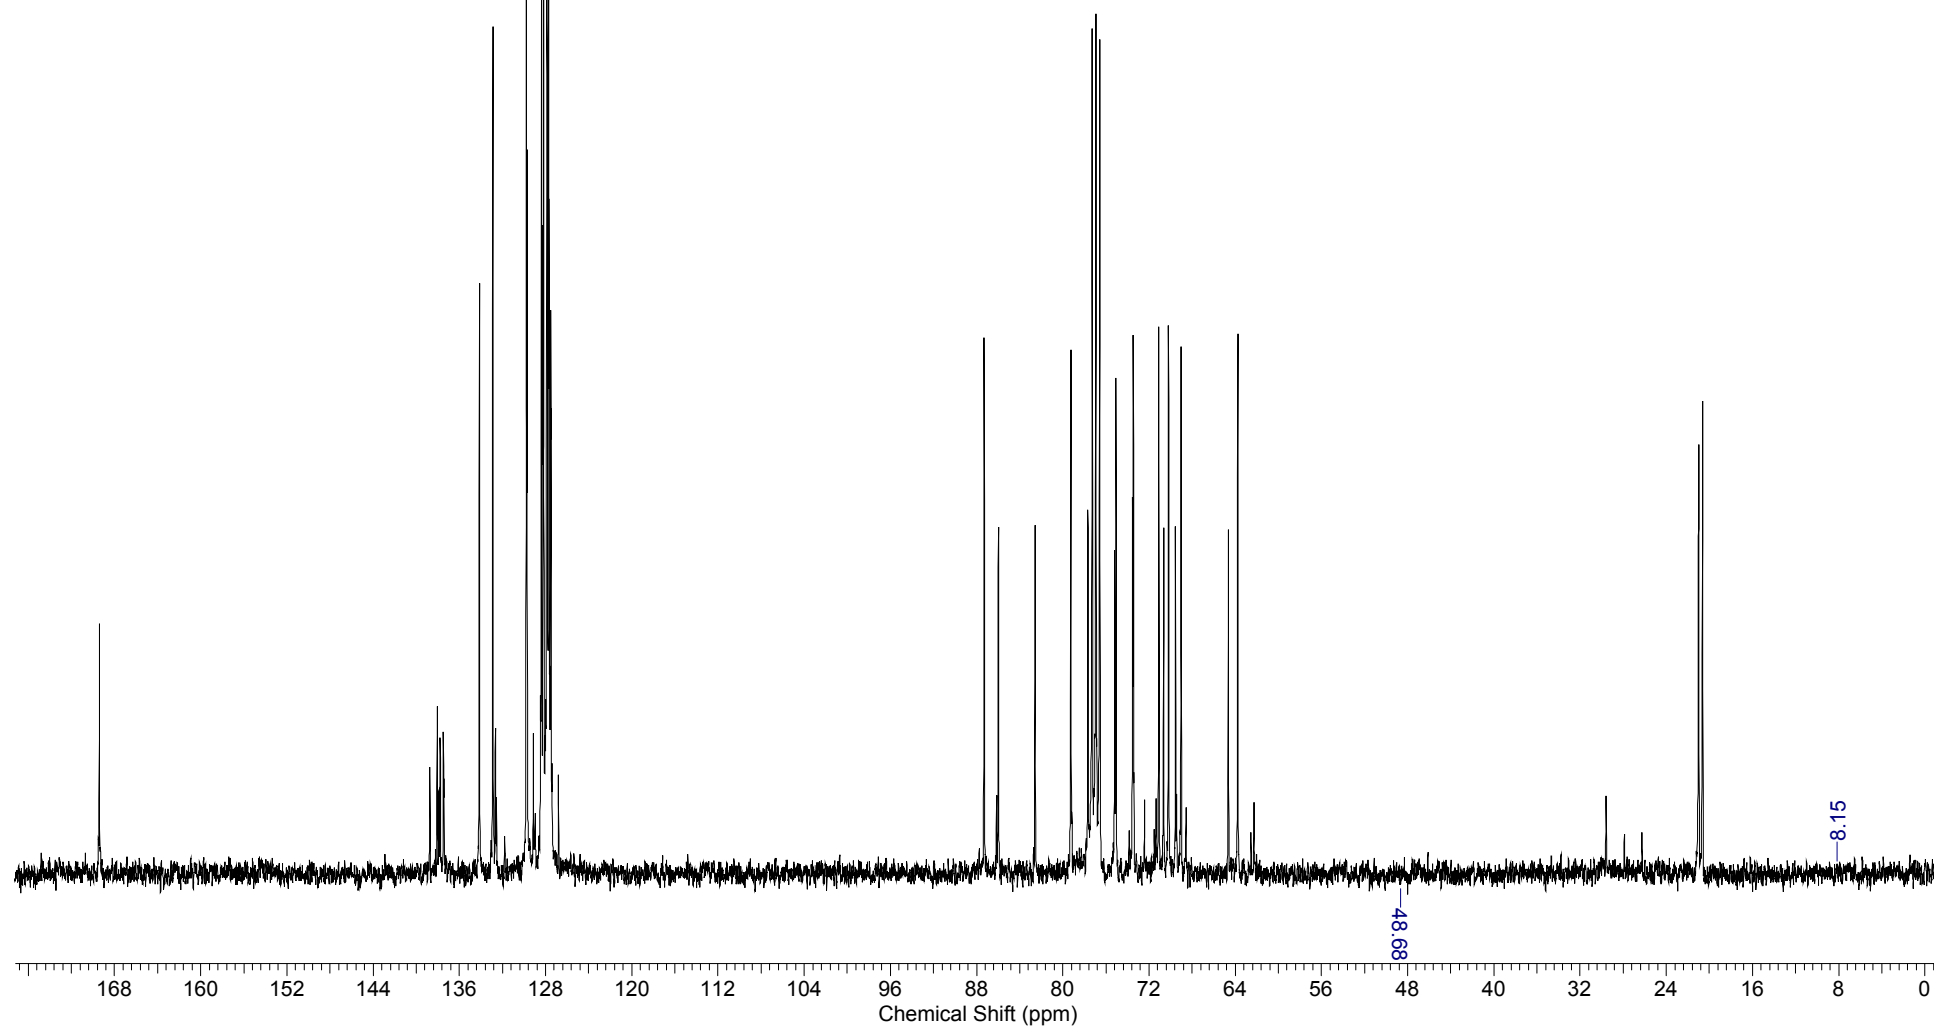



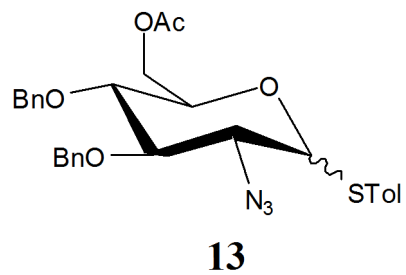

Compound 13 proton.esp

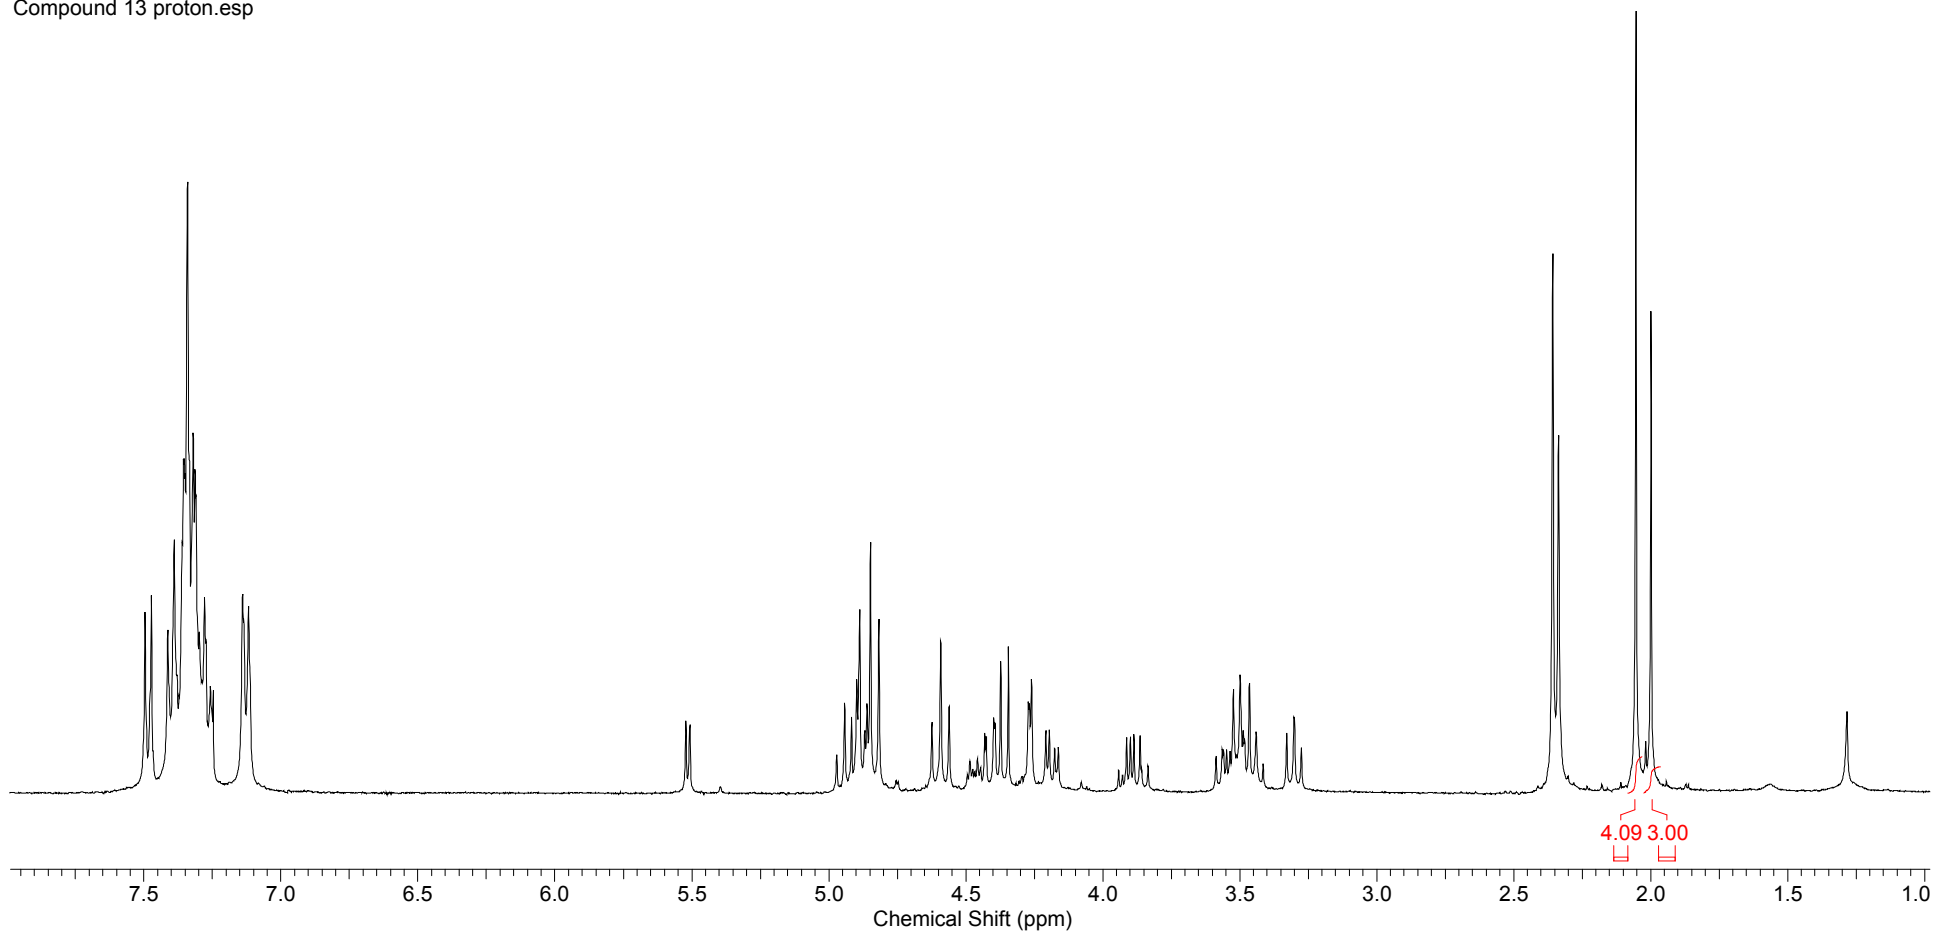

COMPOUND 13 CARBON.ESP

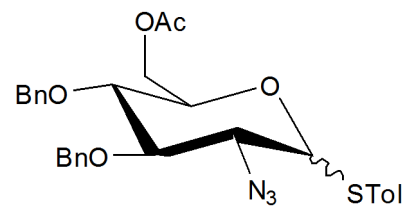

**13**

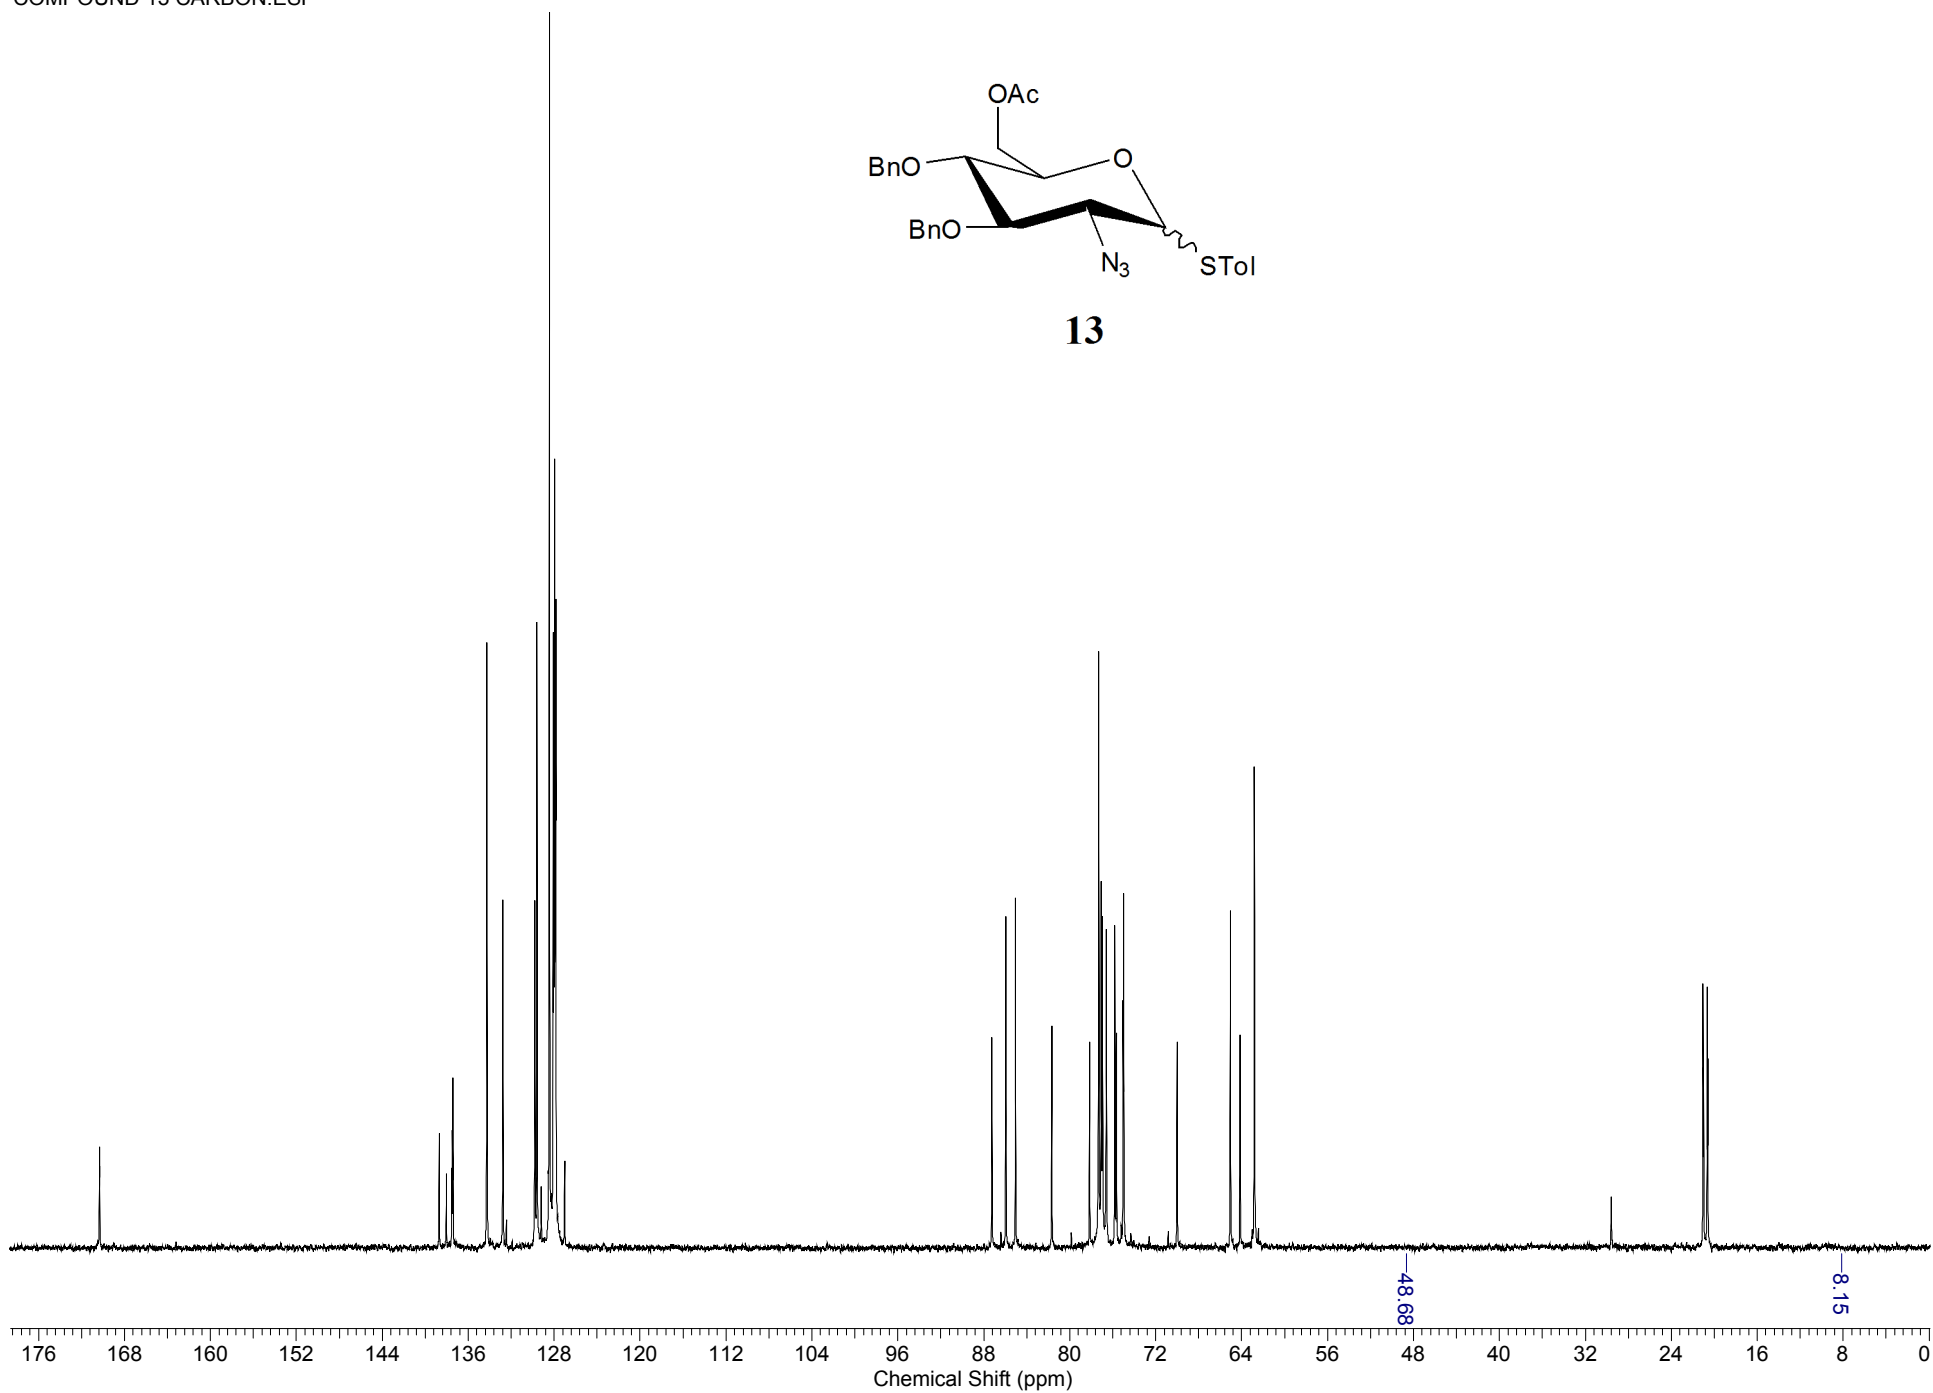

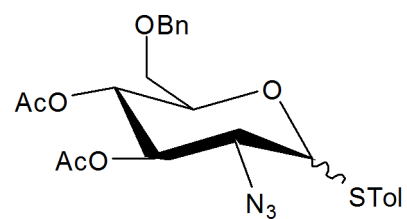

**16**

Compound 16 proton.esp

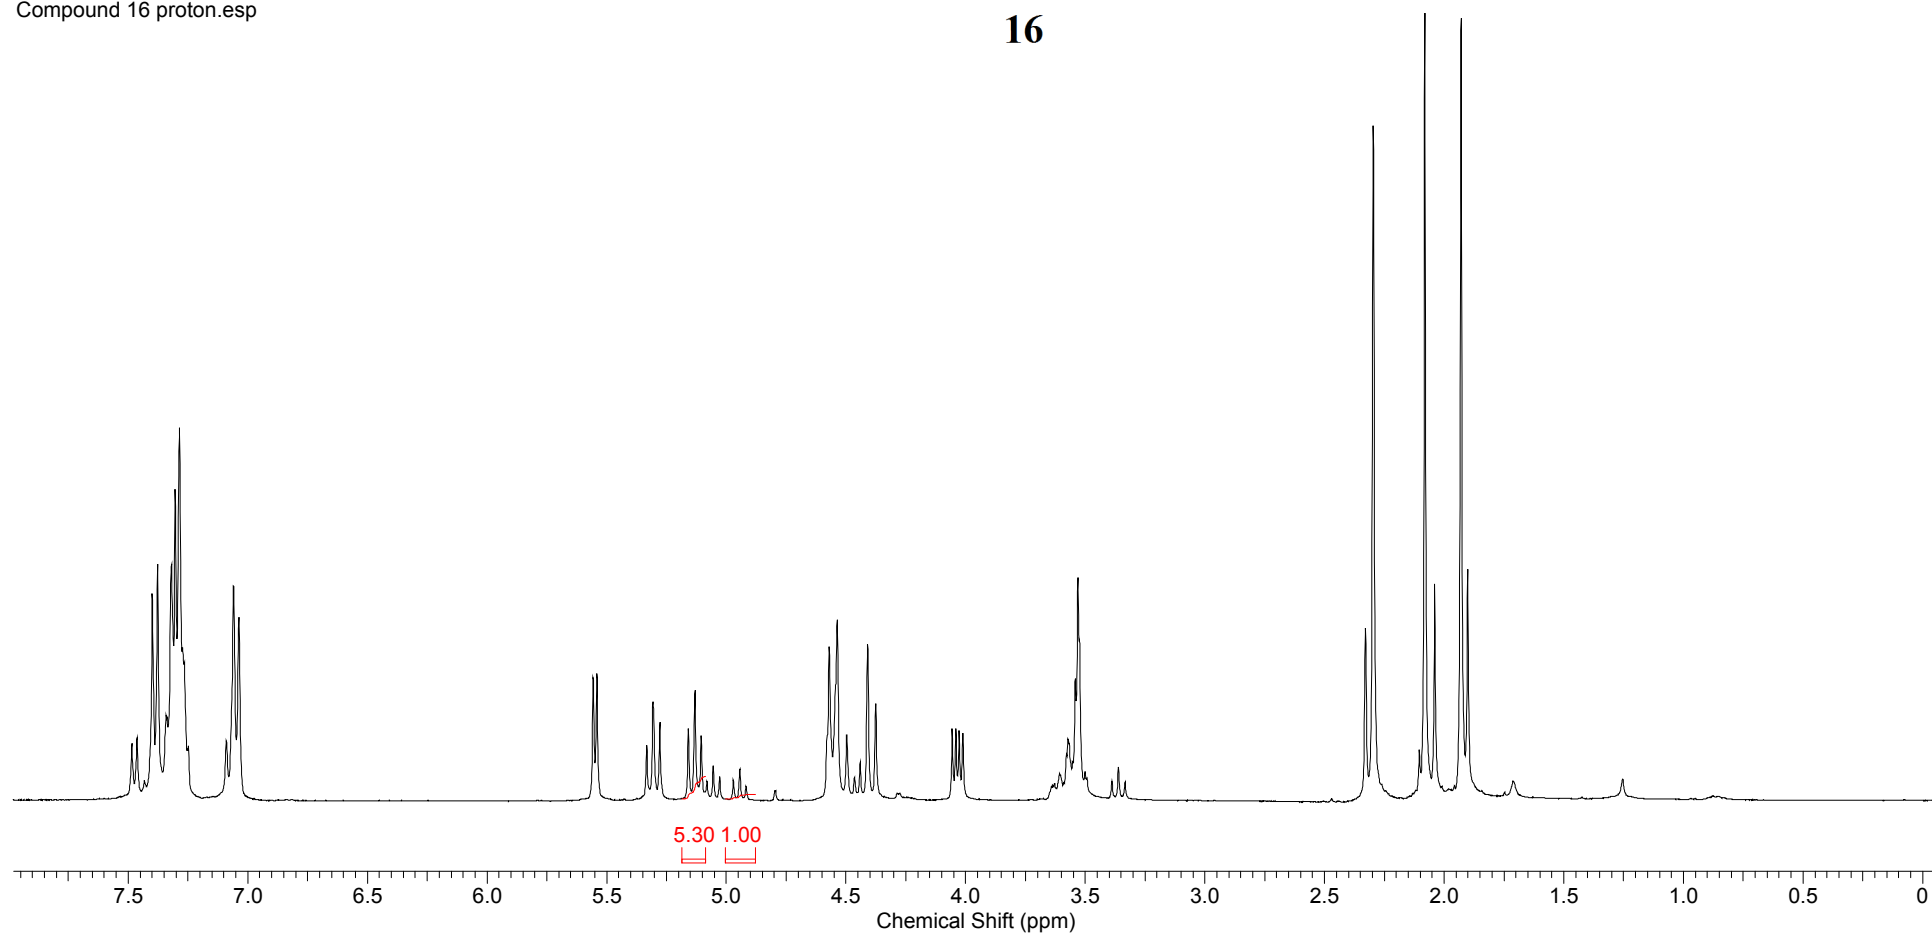

Compound 16 Carbon.esp

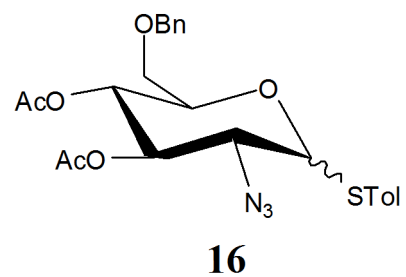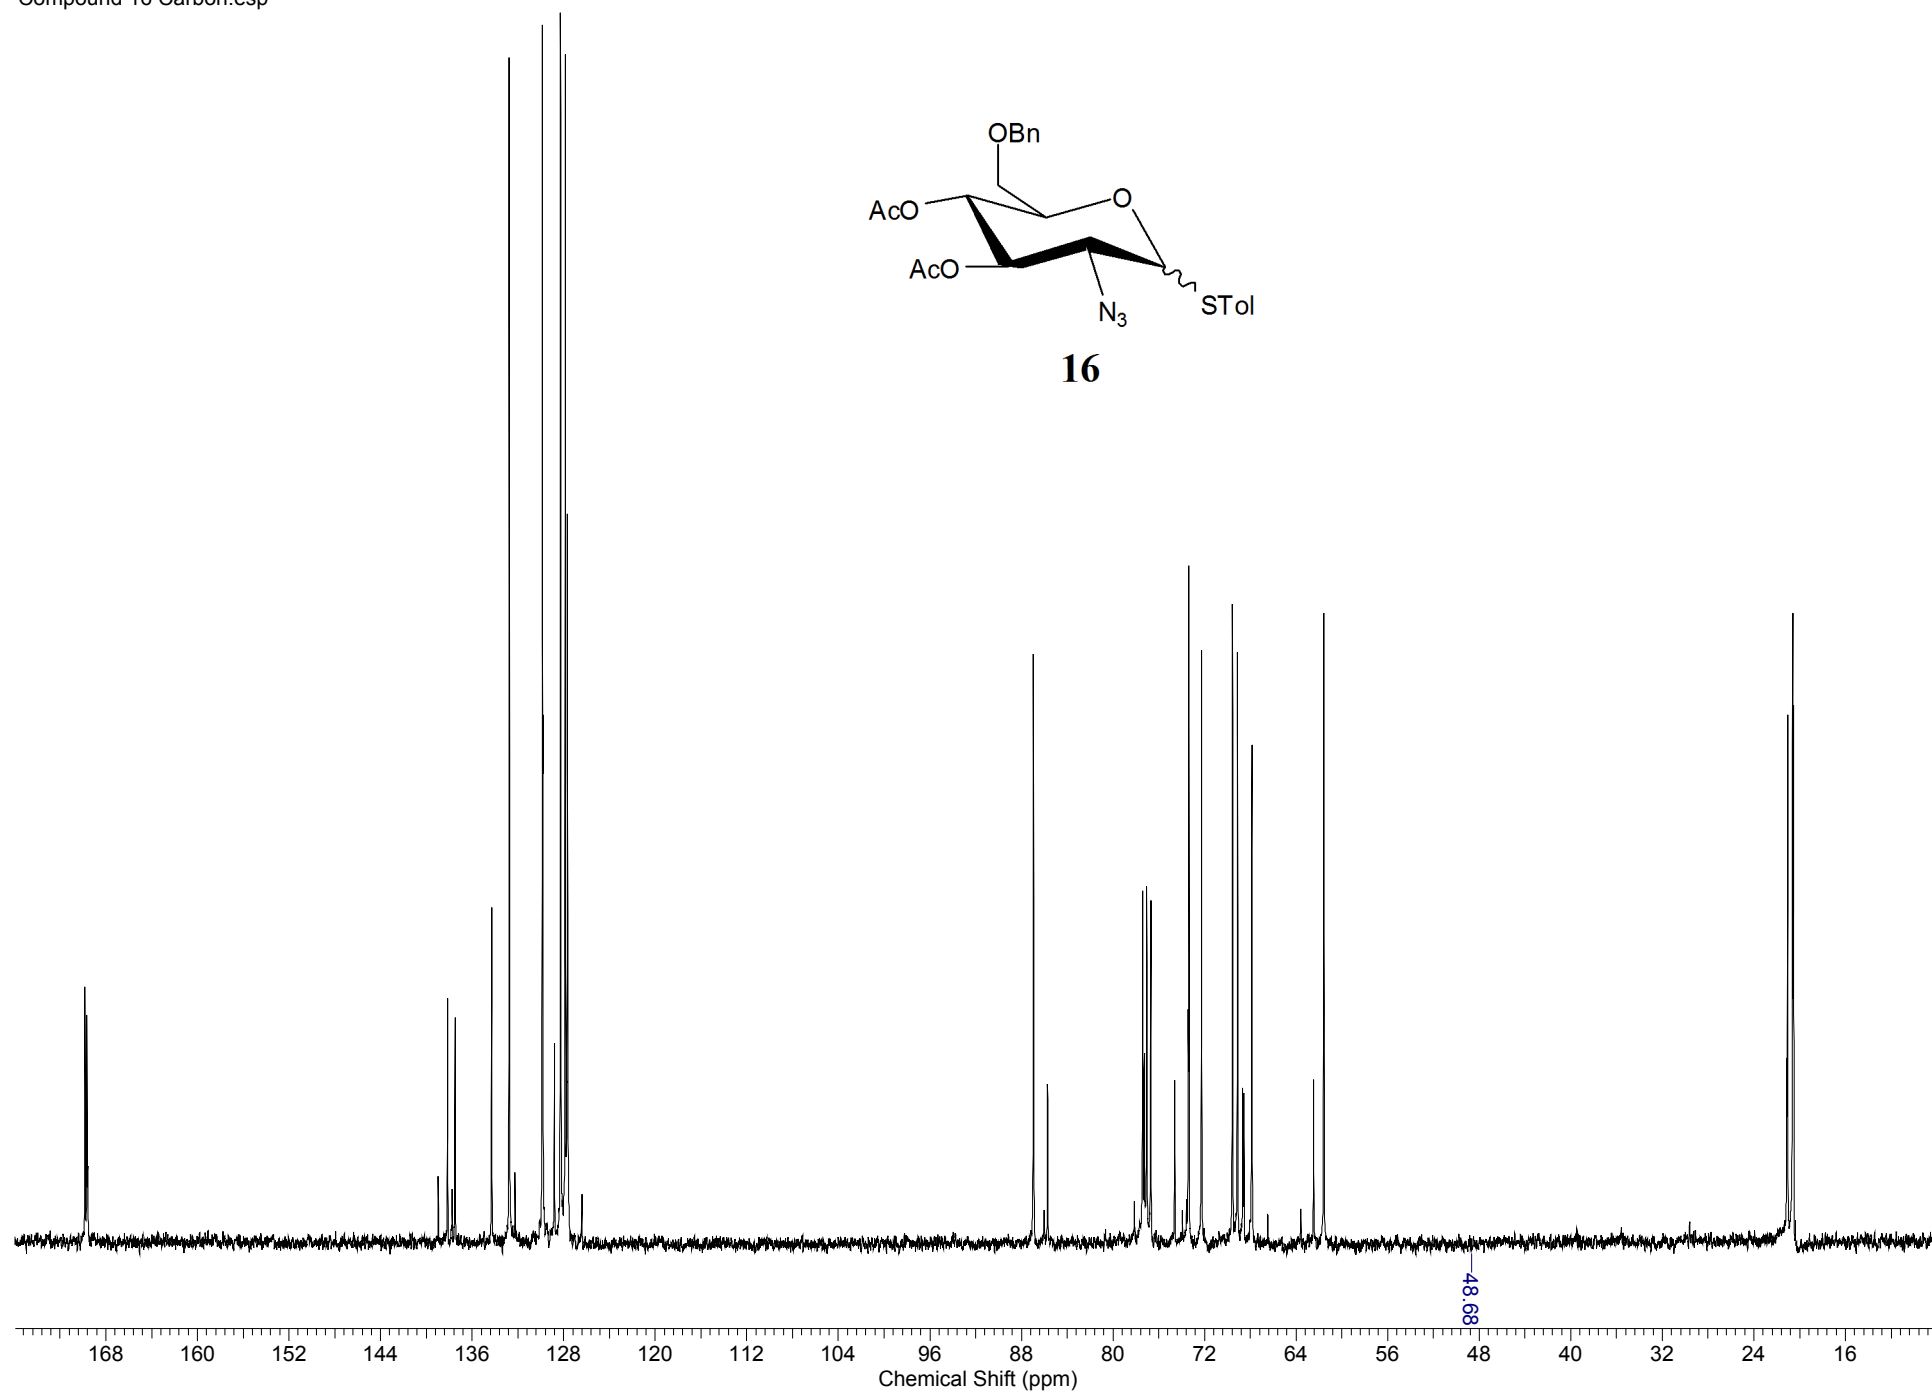

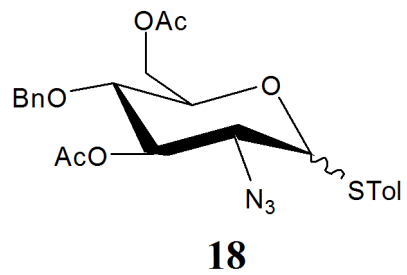

Compound 18 proton.esp

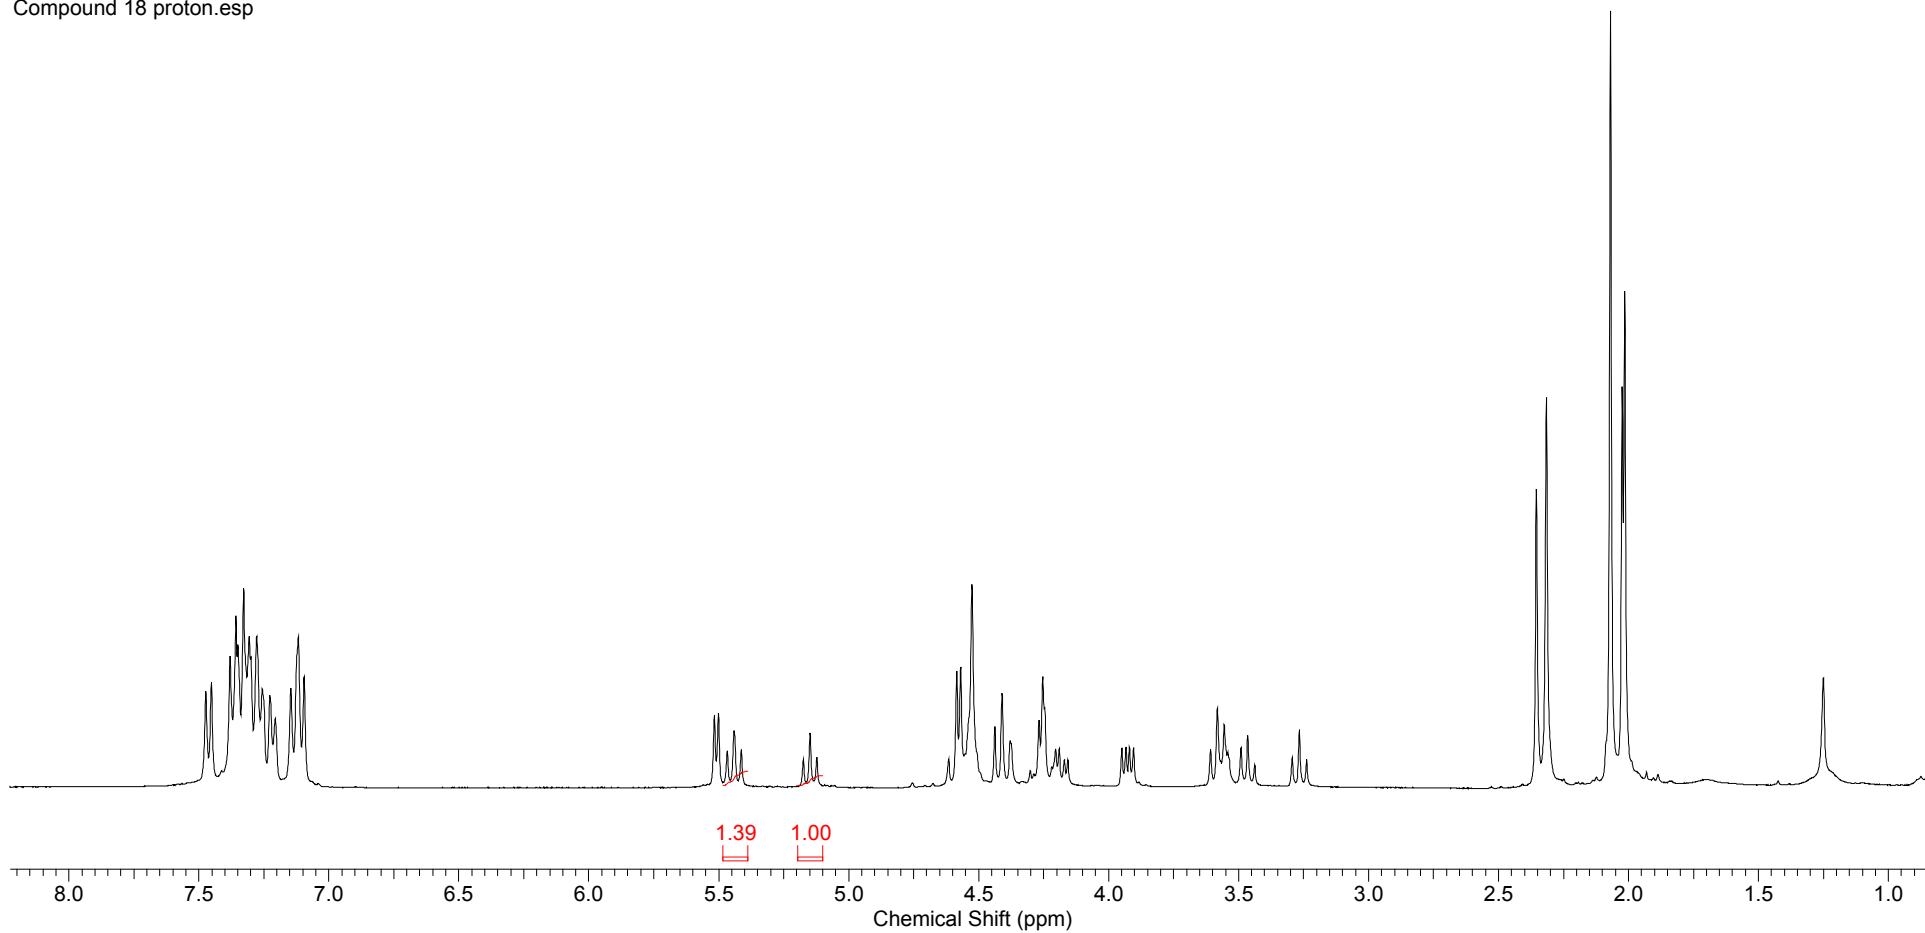

Compound 18 Carbon .esp

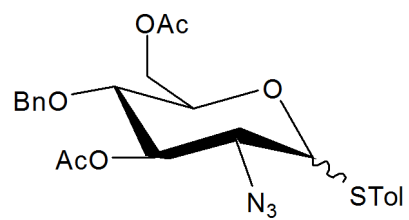

**18**

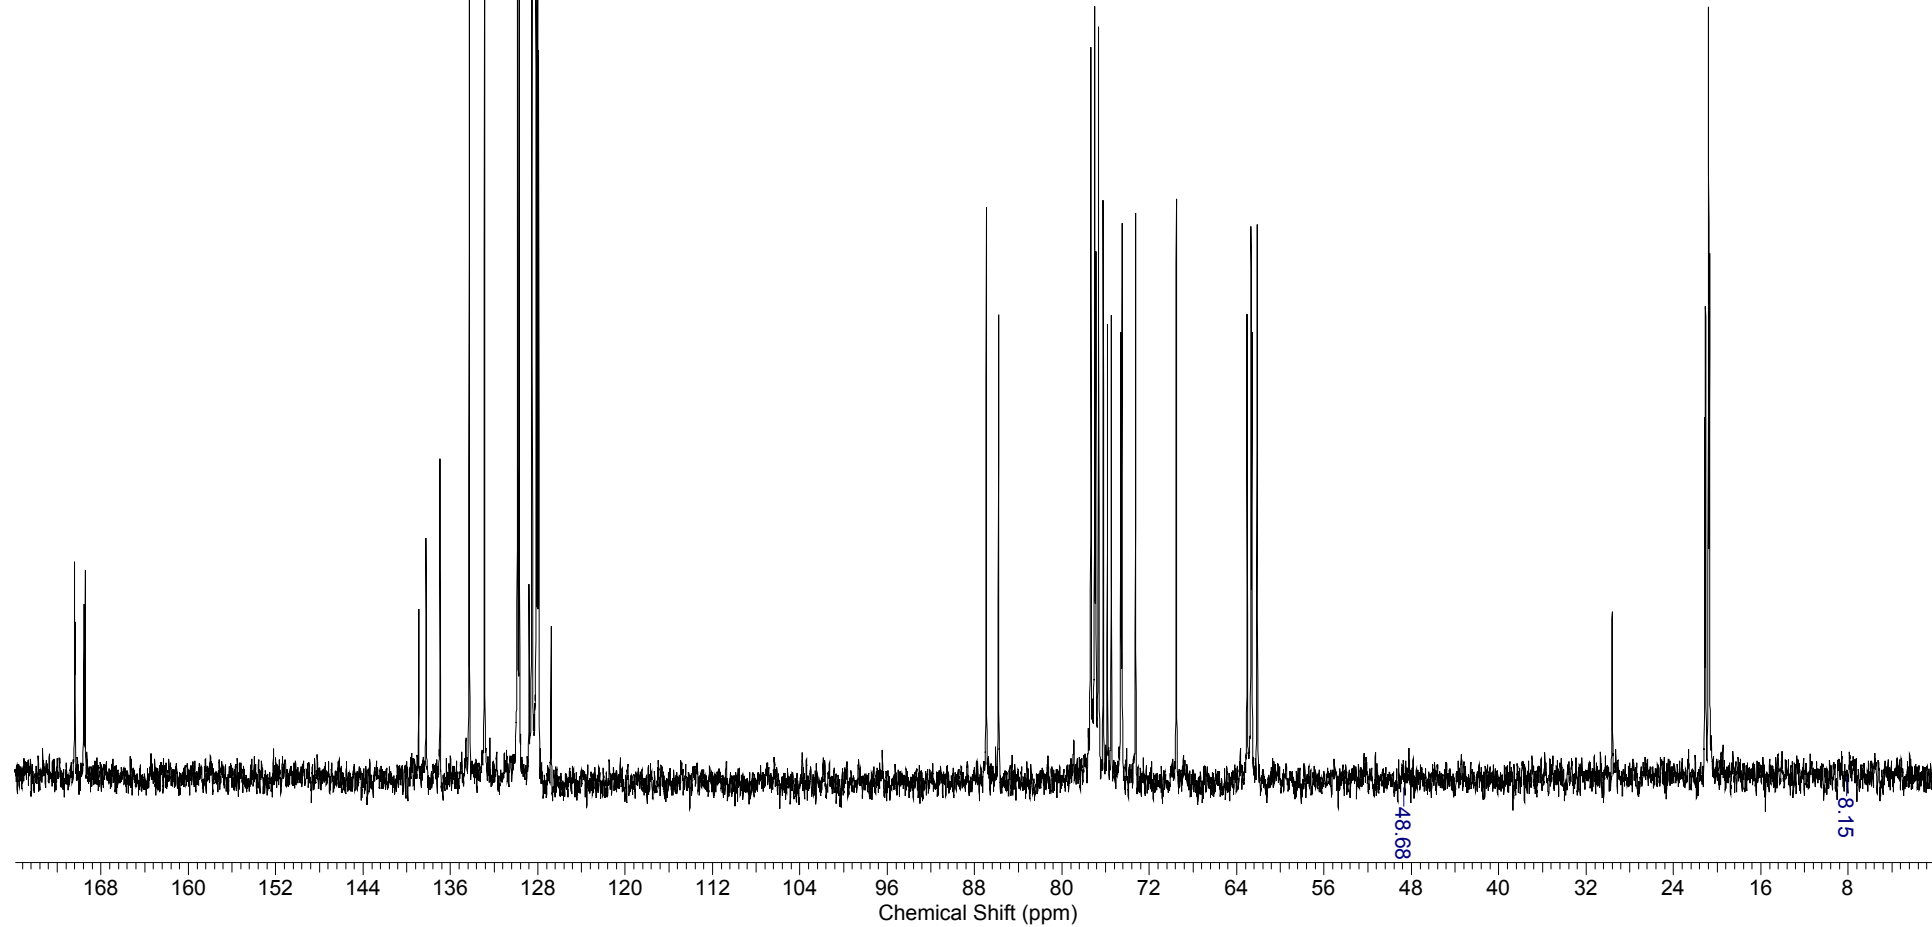

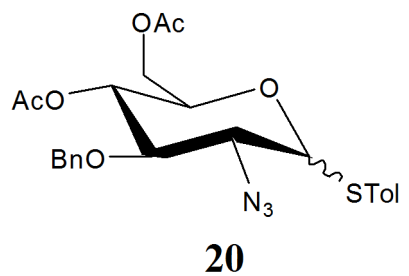

Compound 20 proton.esp

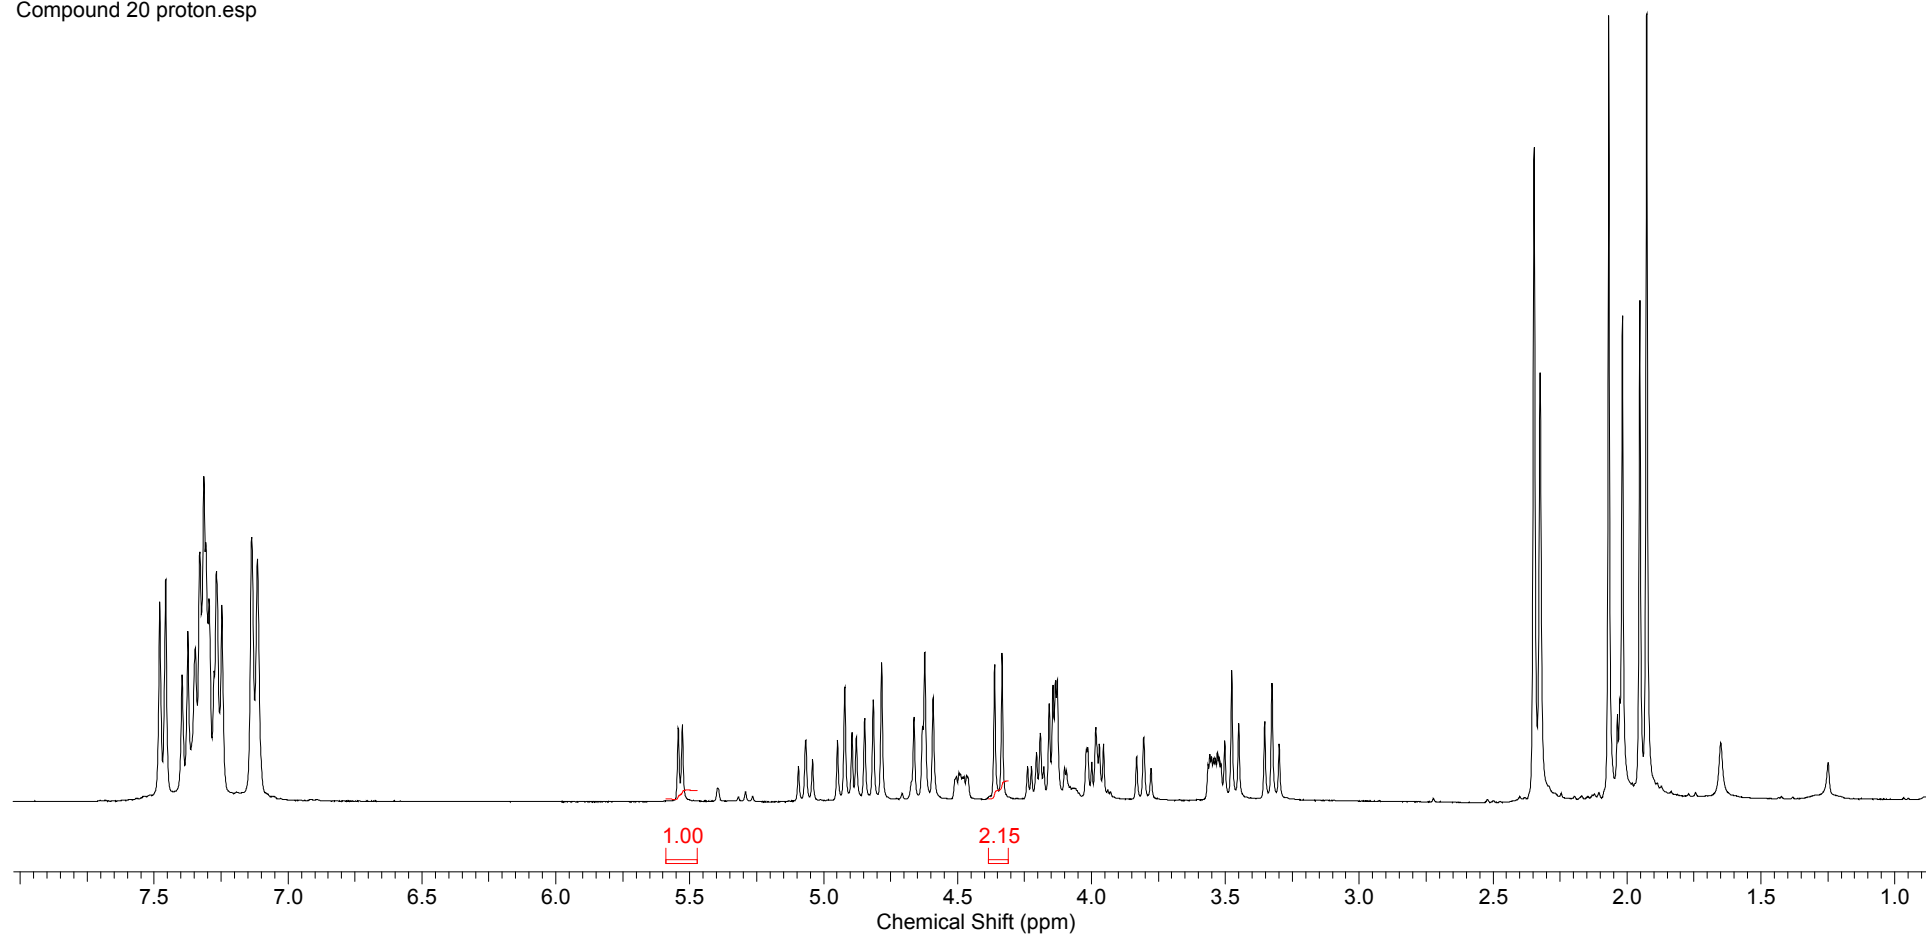

Compound 20 Carbon.esp

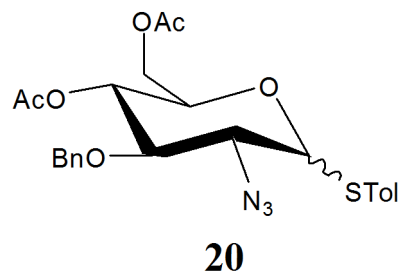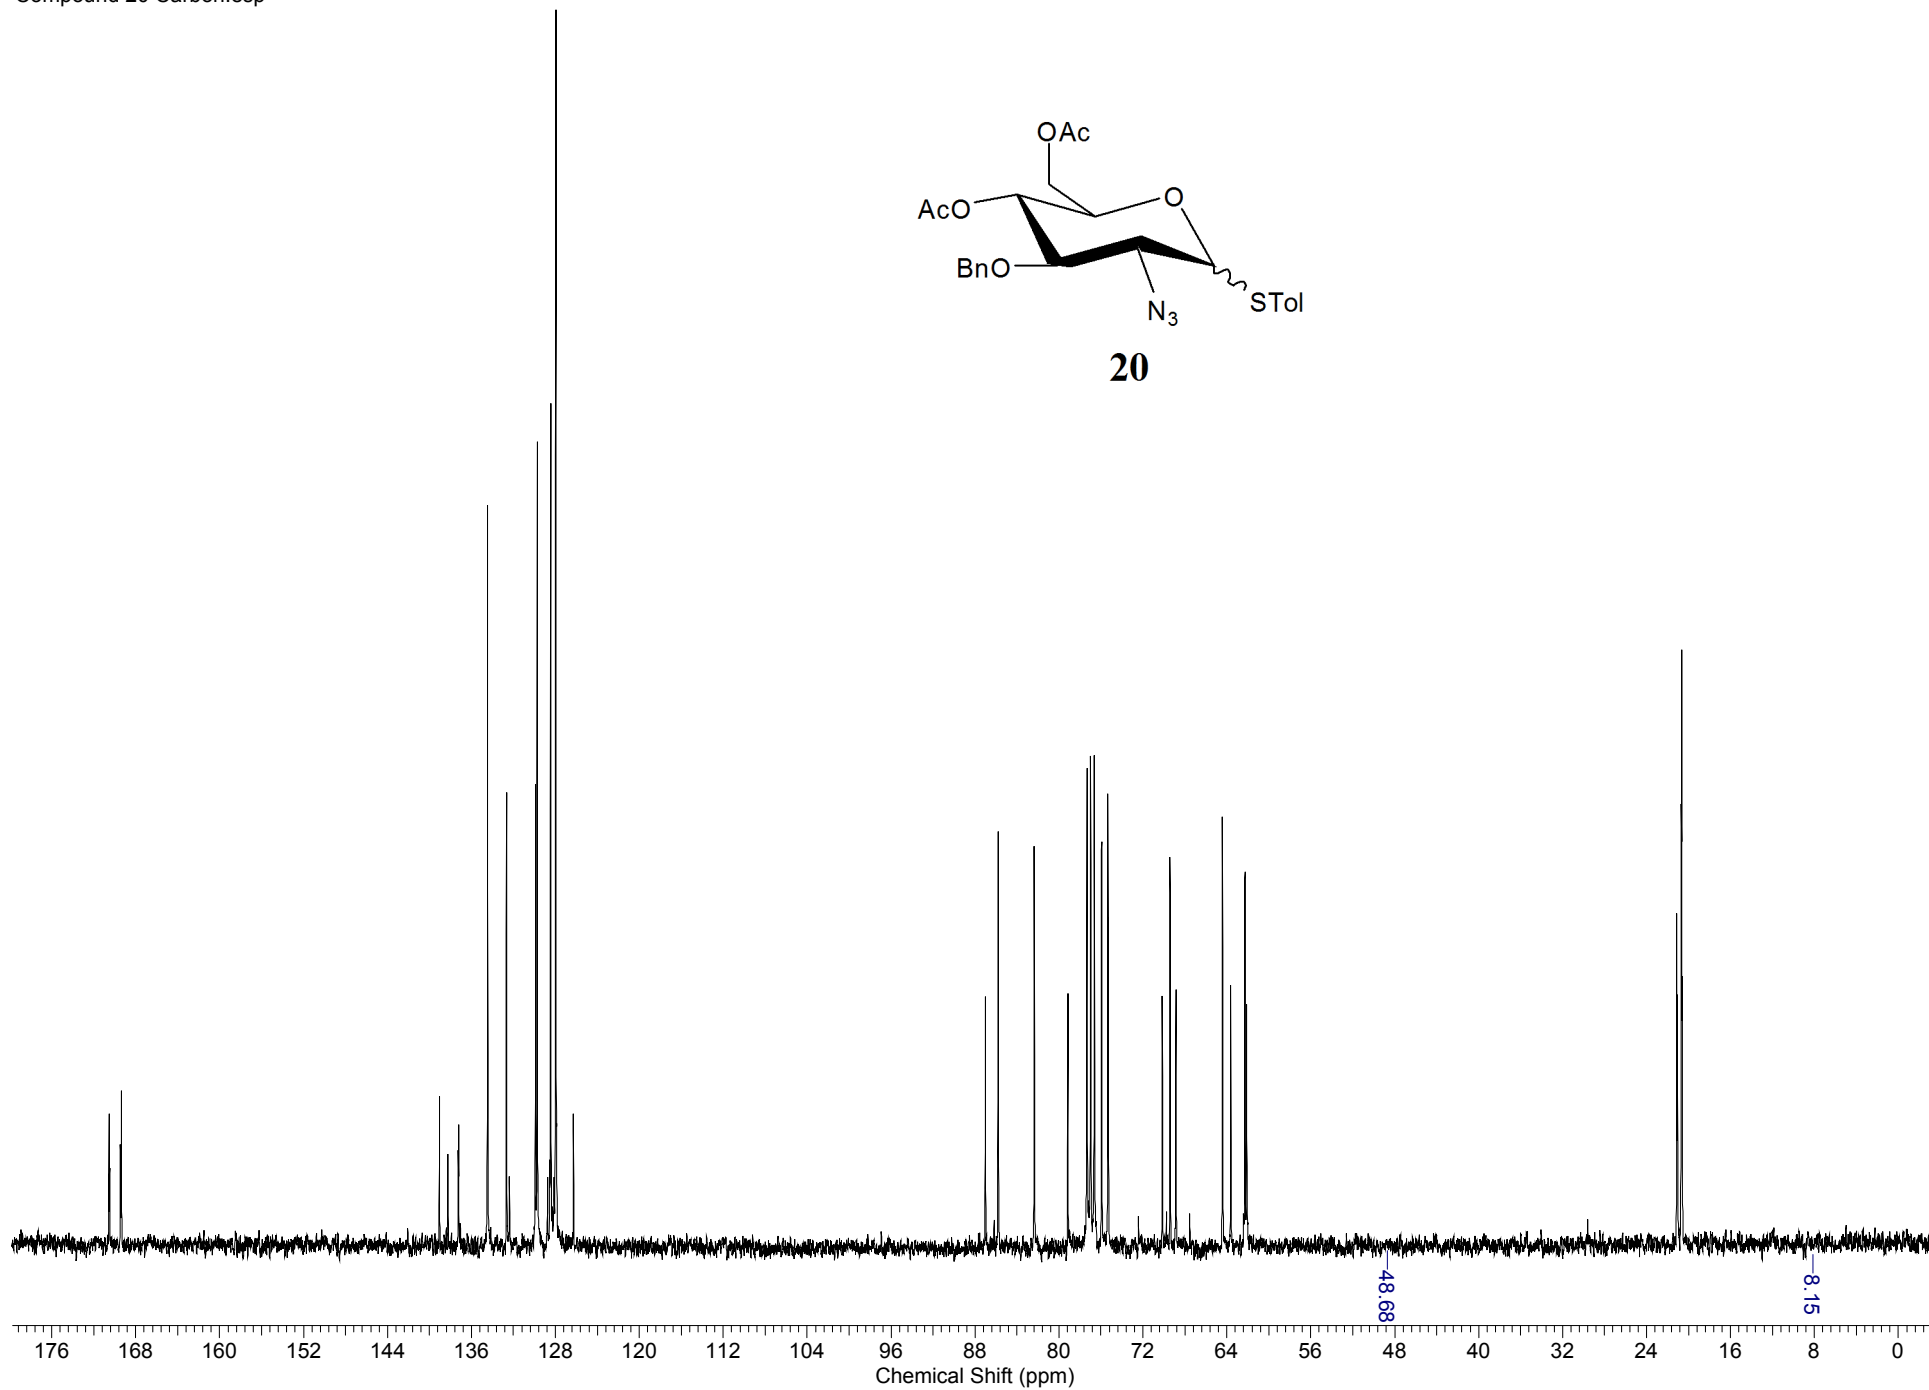



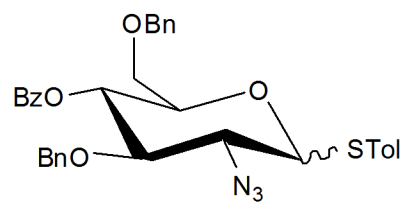

**11b**

Compound 11b proton.esp

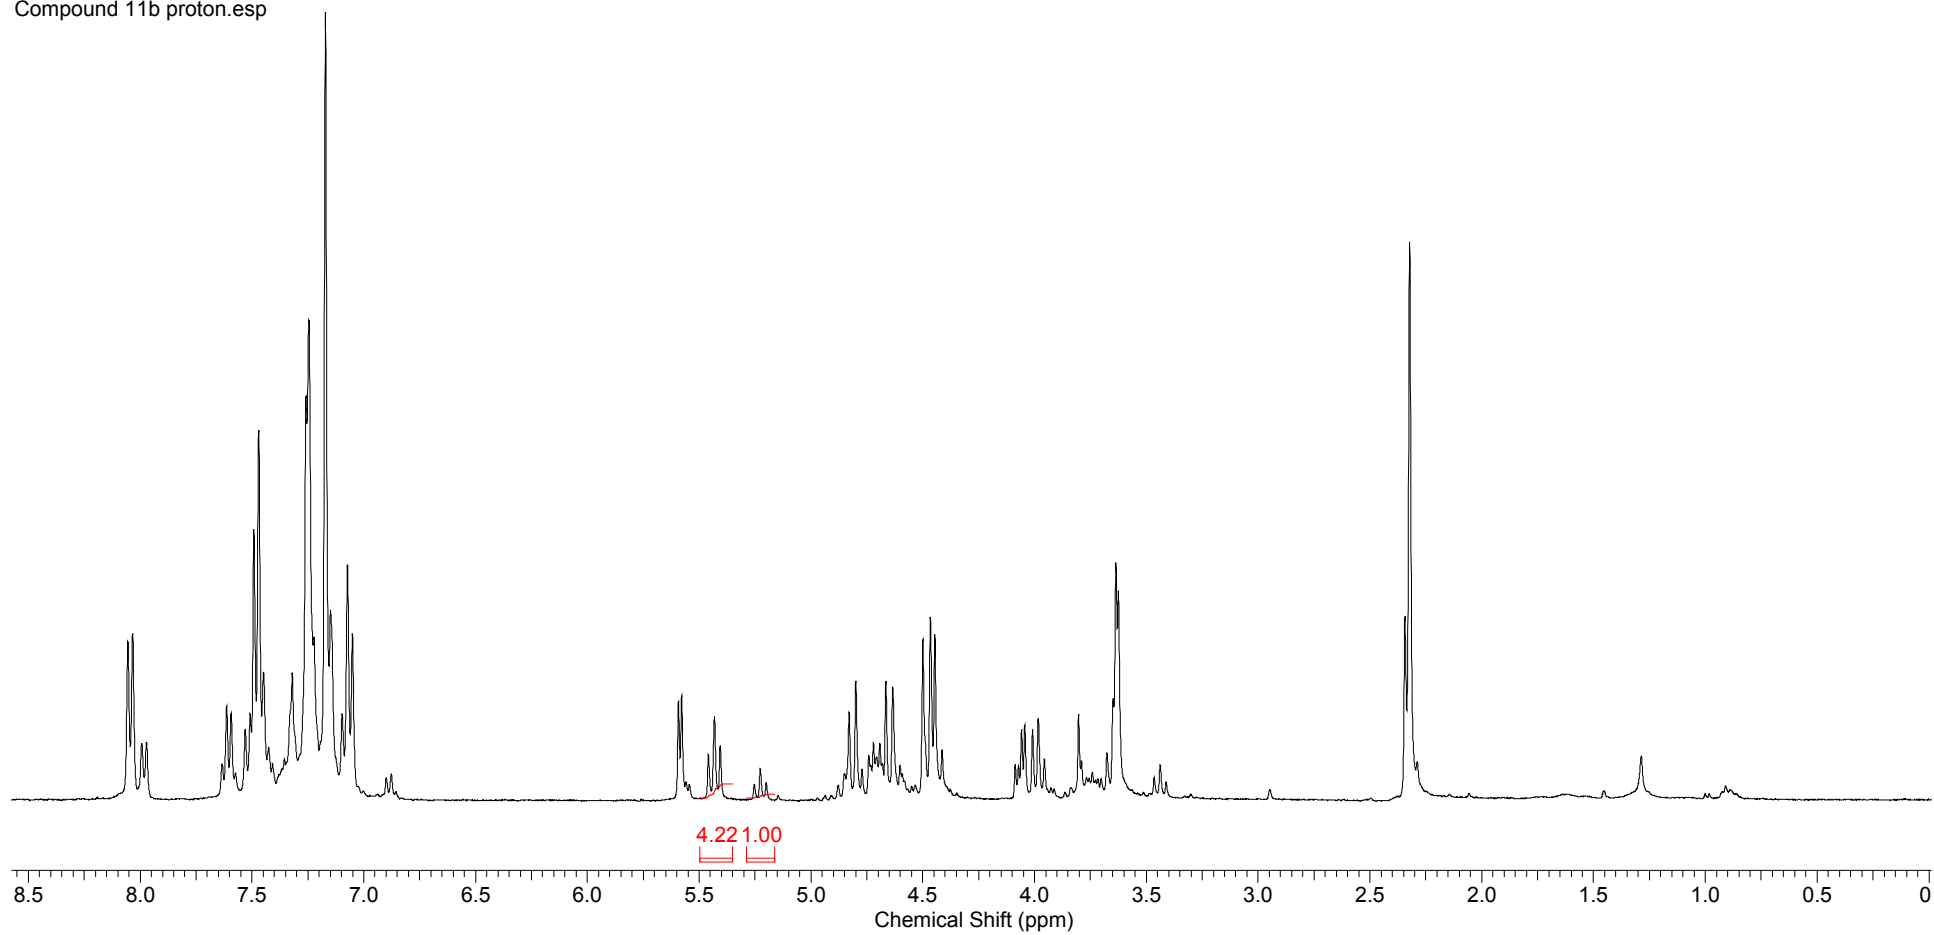

Compound 11a Carbon.esp

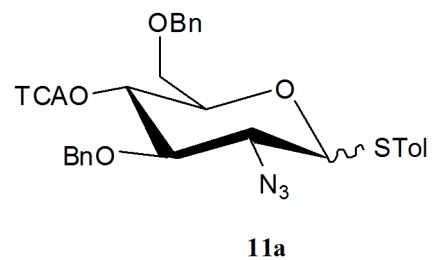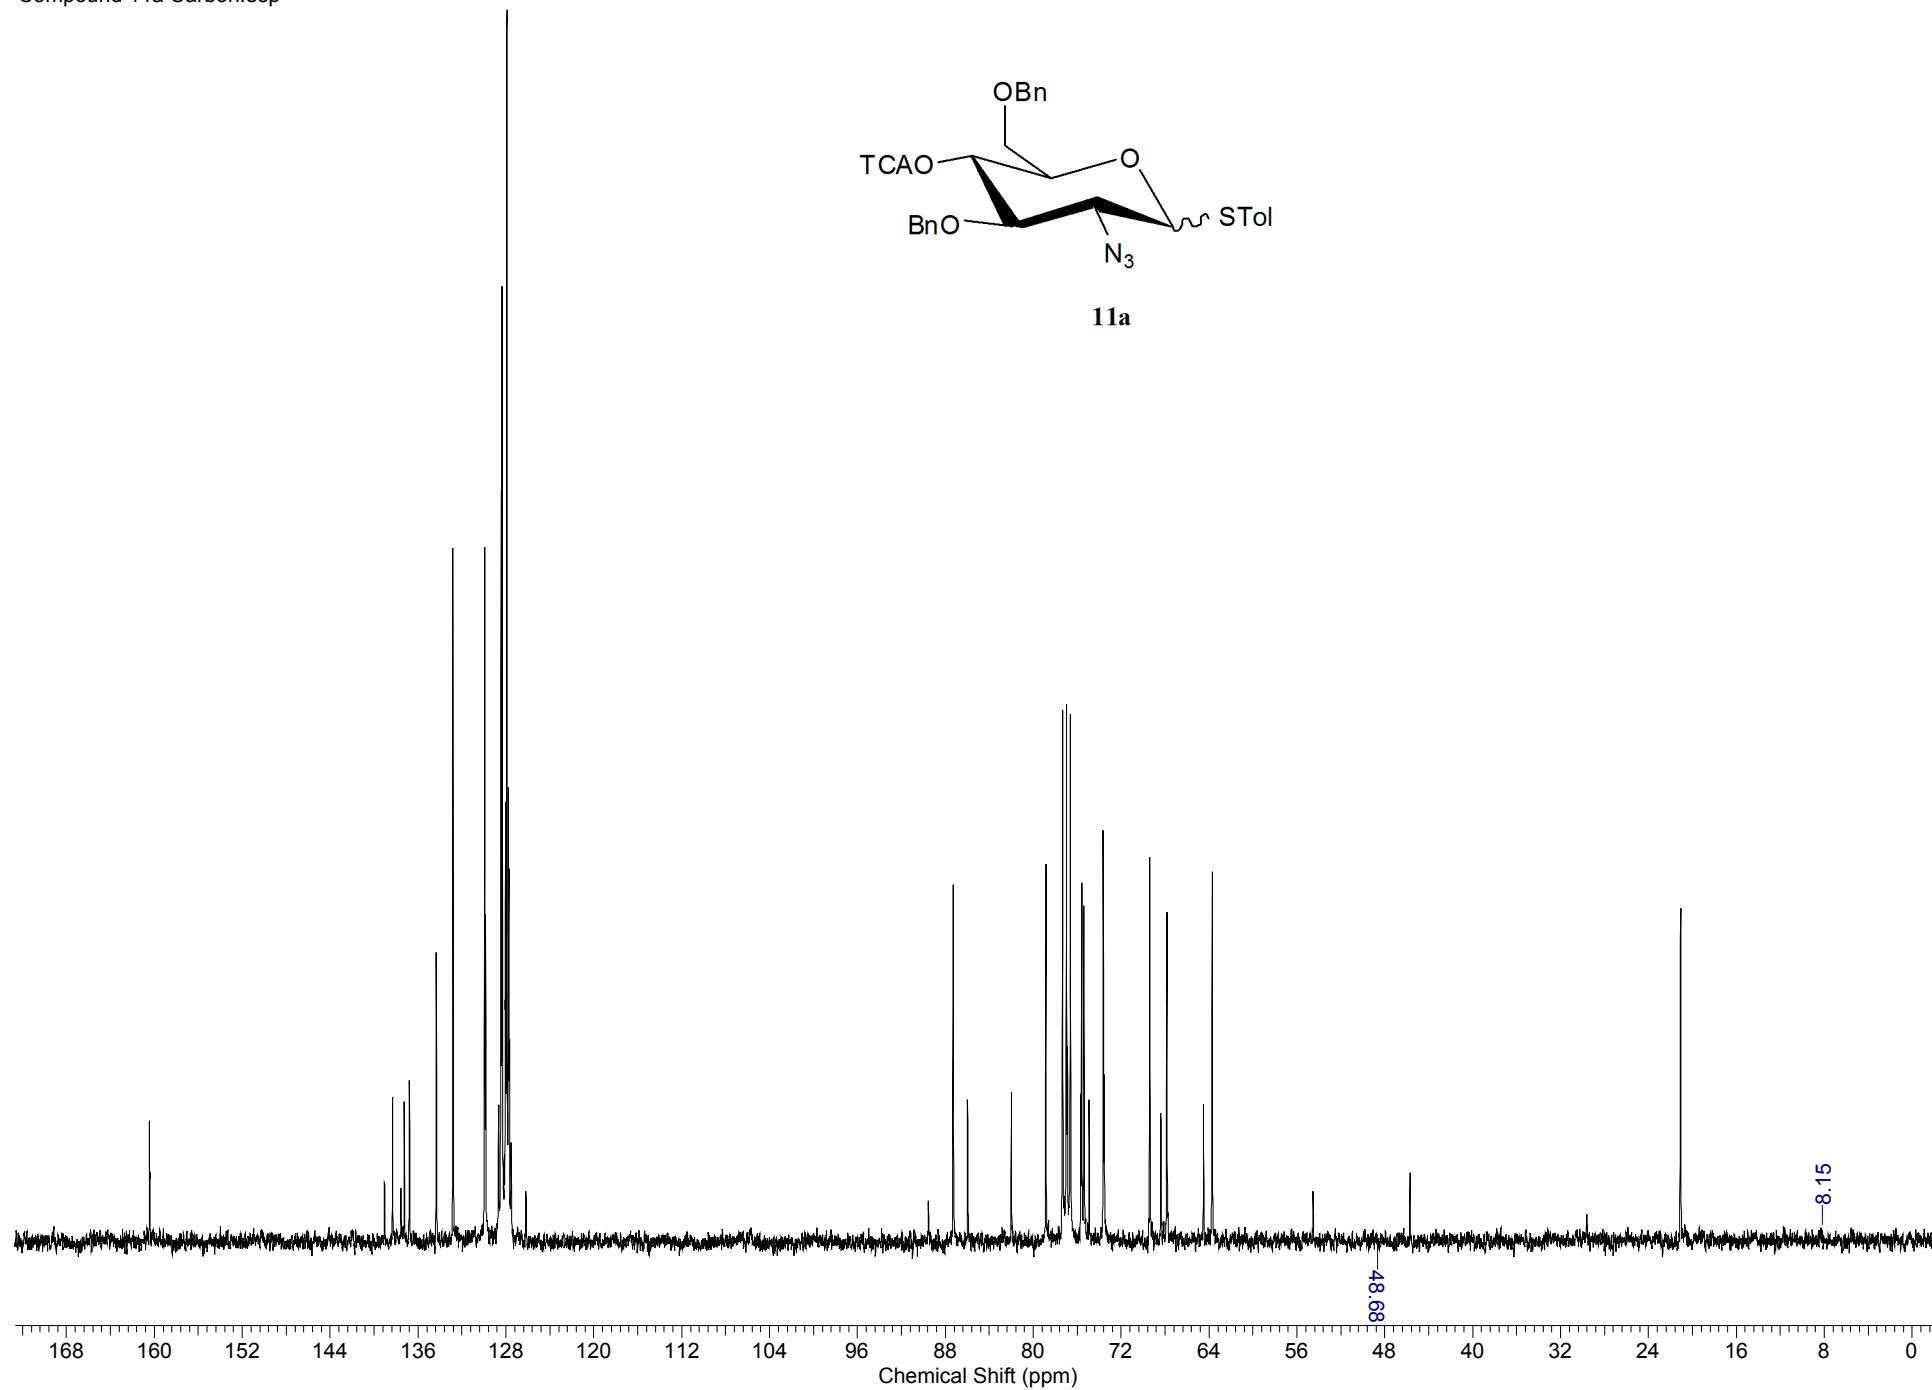

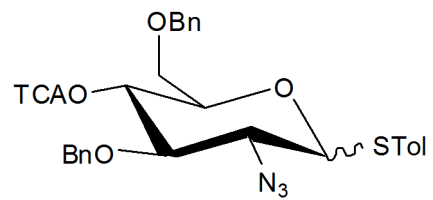

**11a**

COMPOUND 11A PROTON.ESP

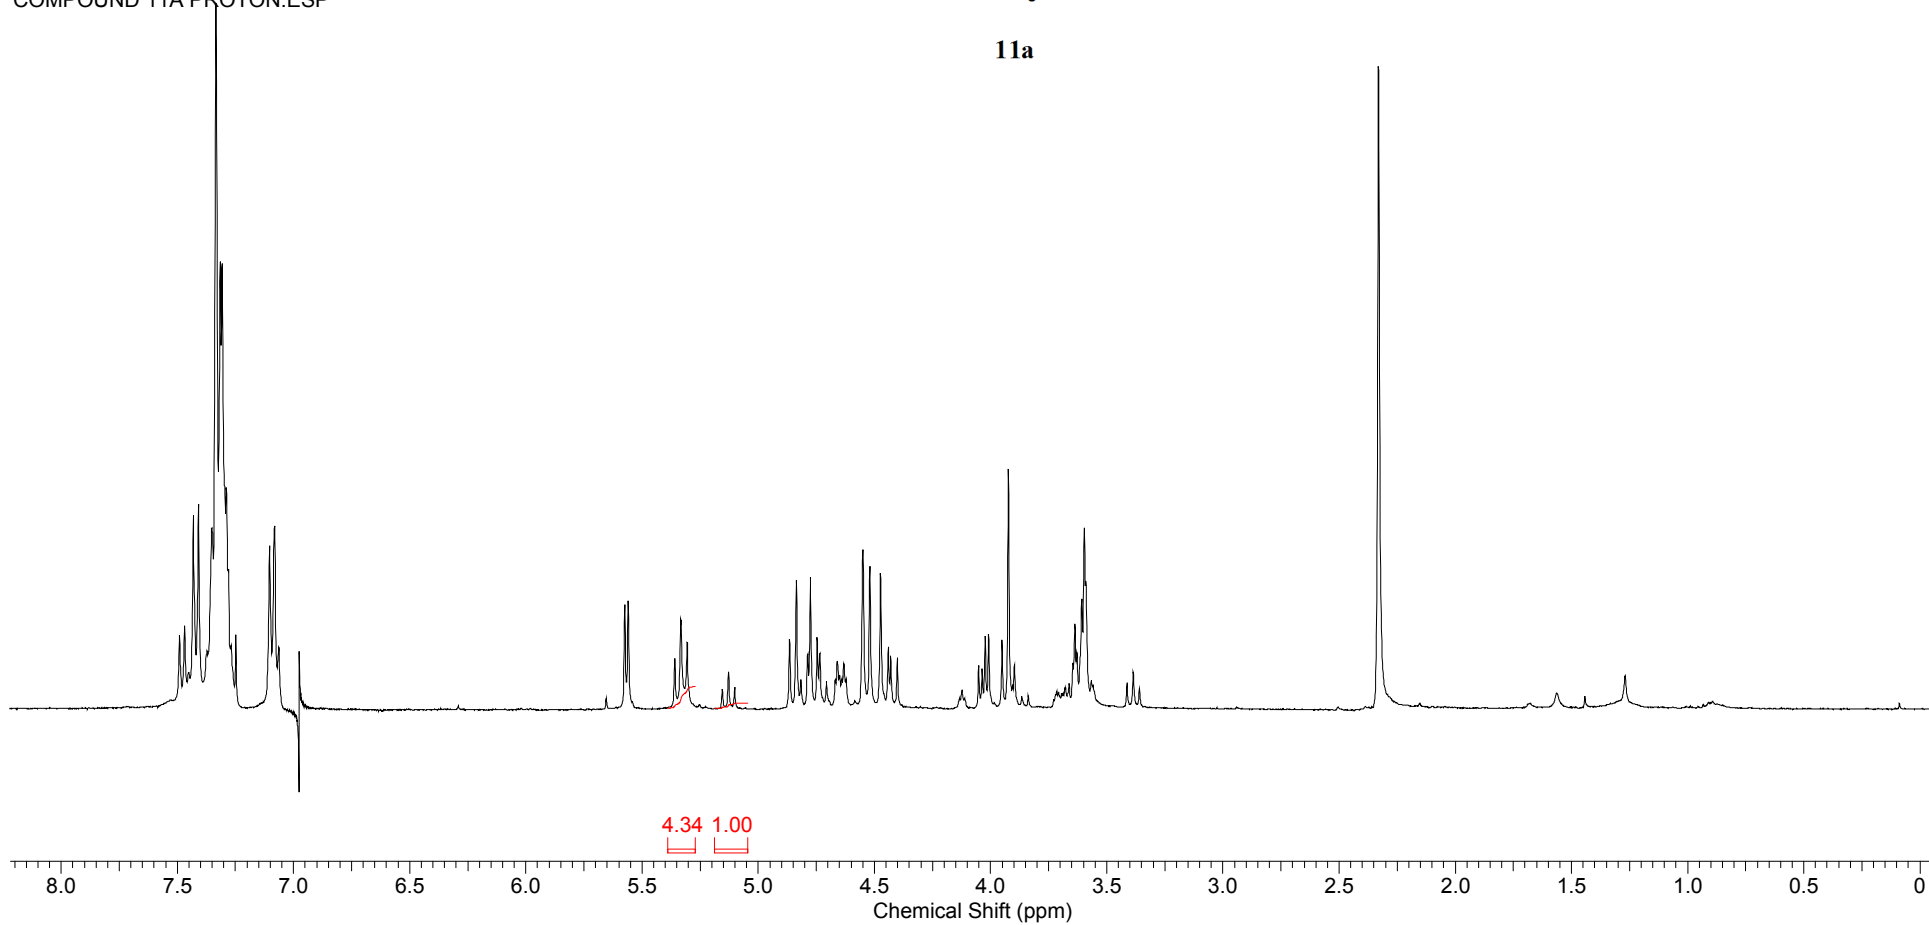

Compound 11b Carbon.esp

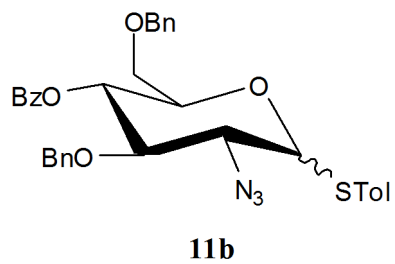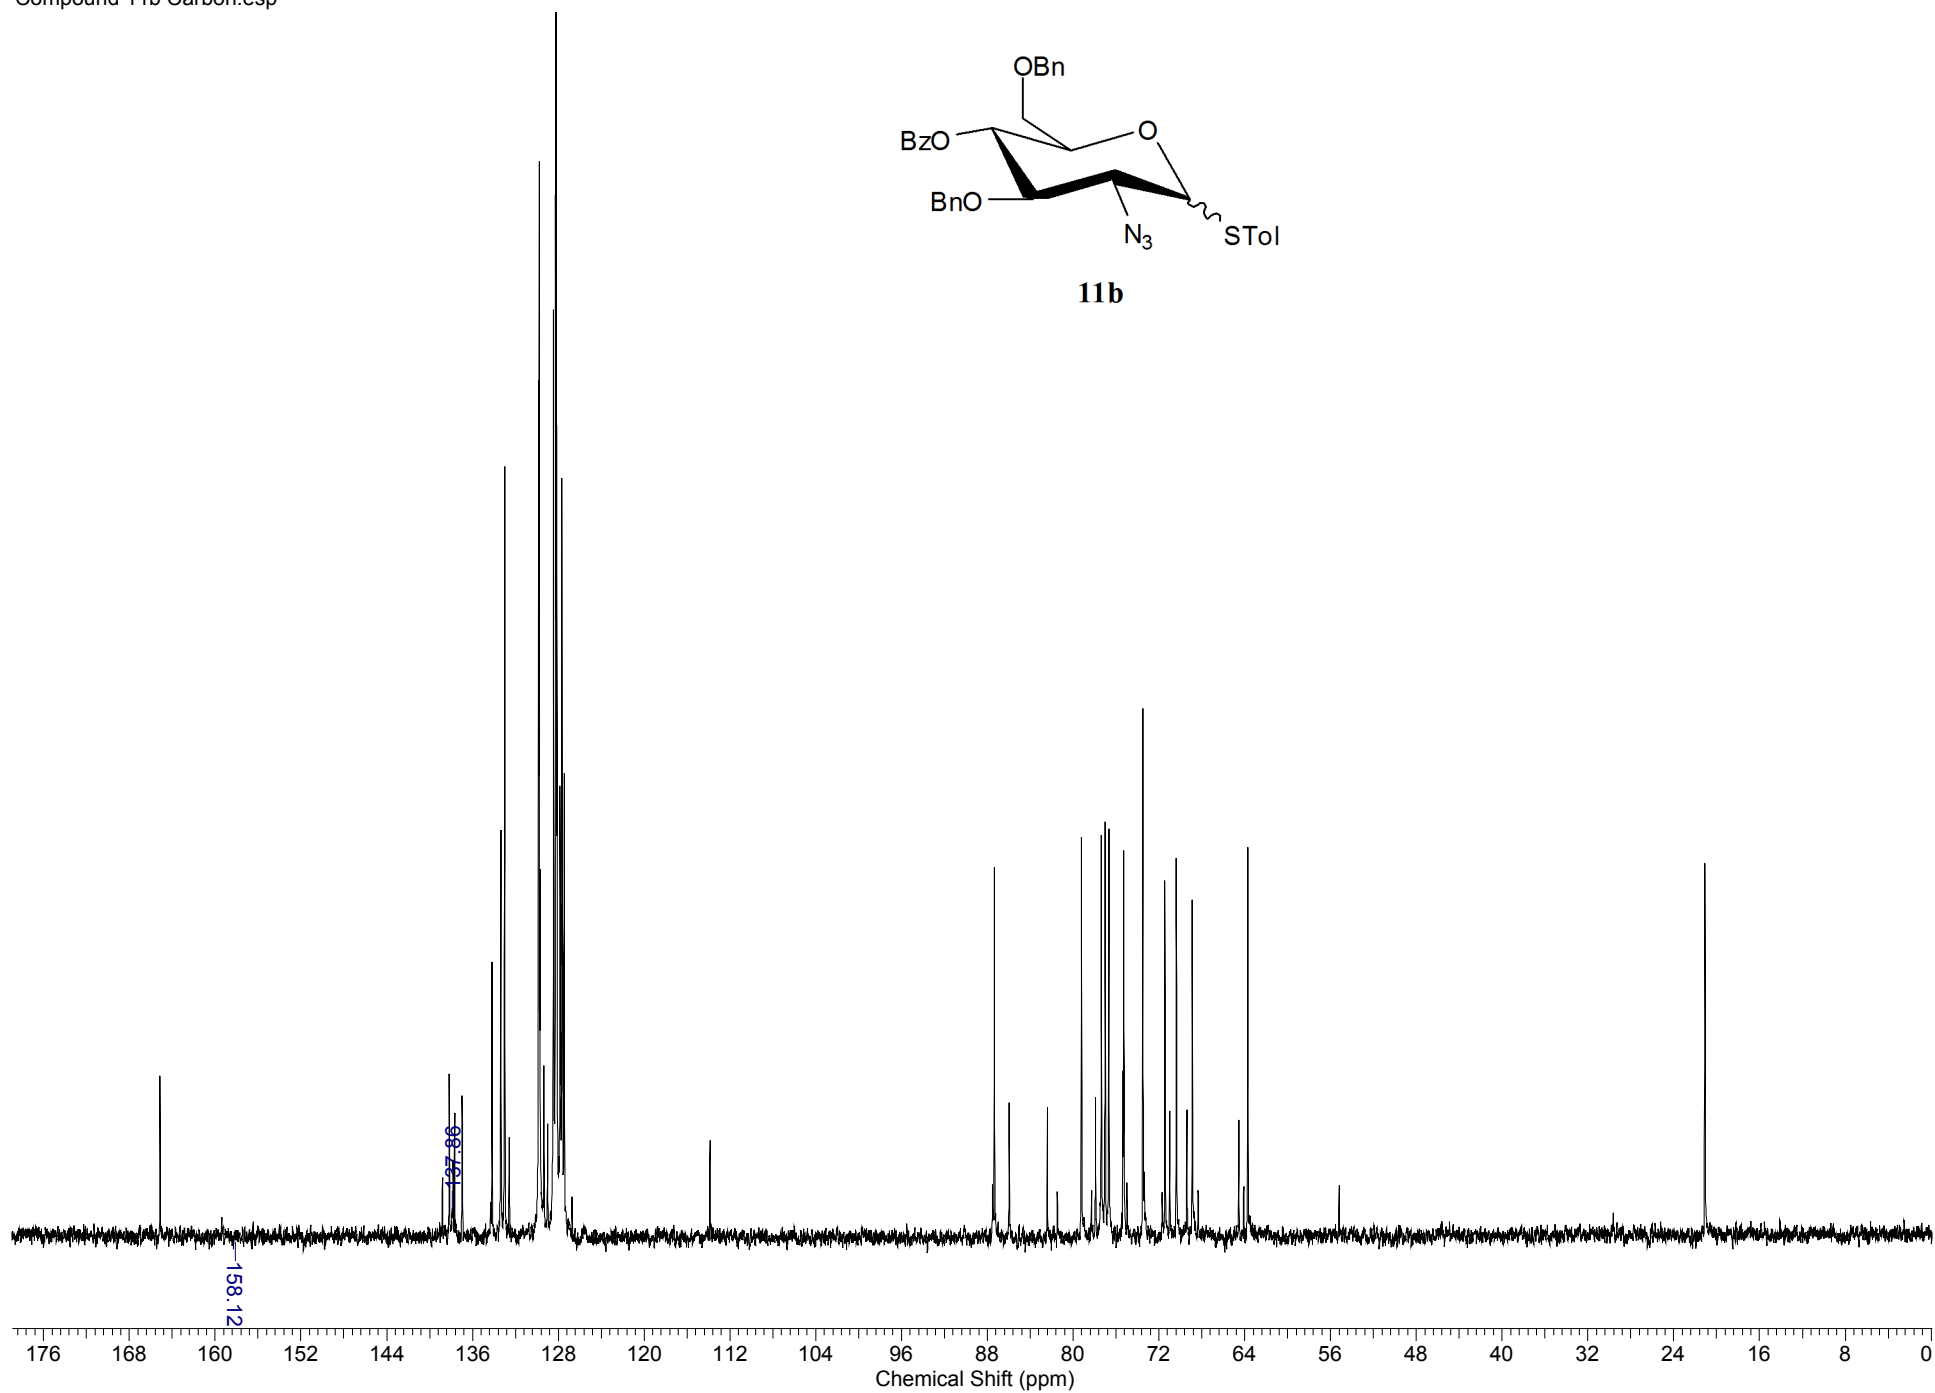

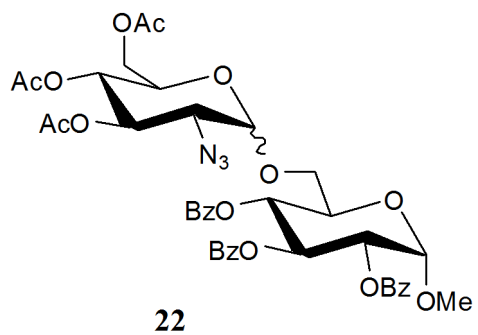

COMPOUND 22 PROTON.ESP

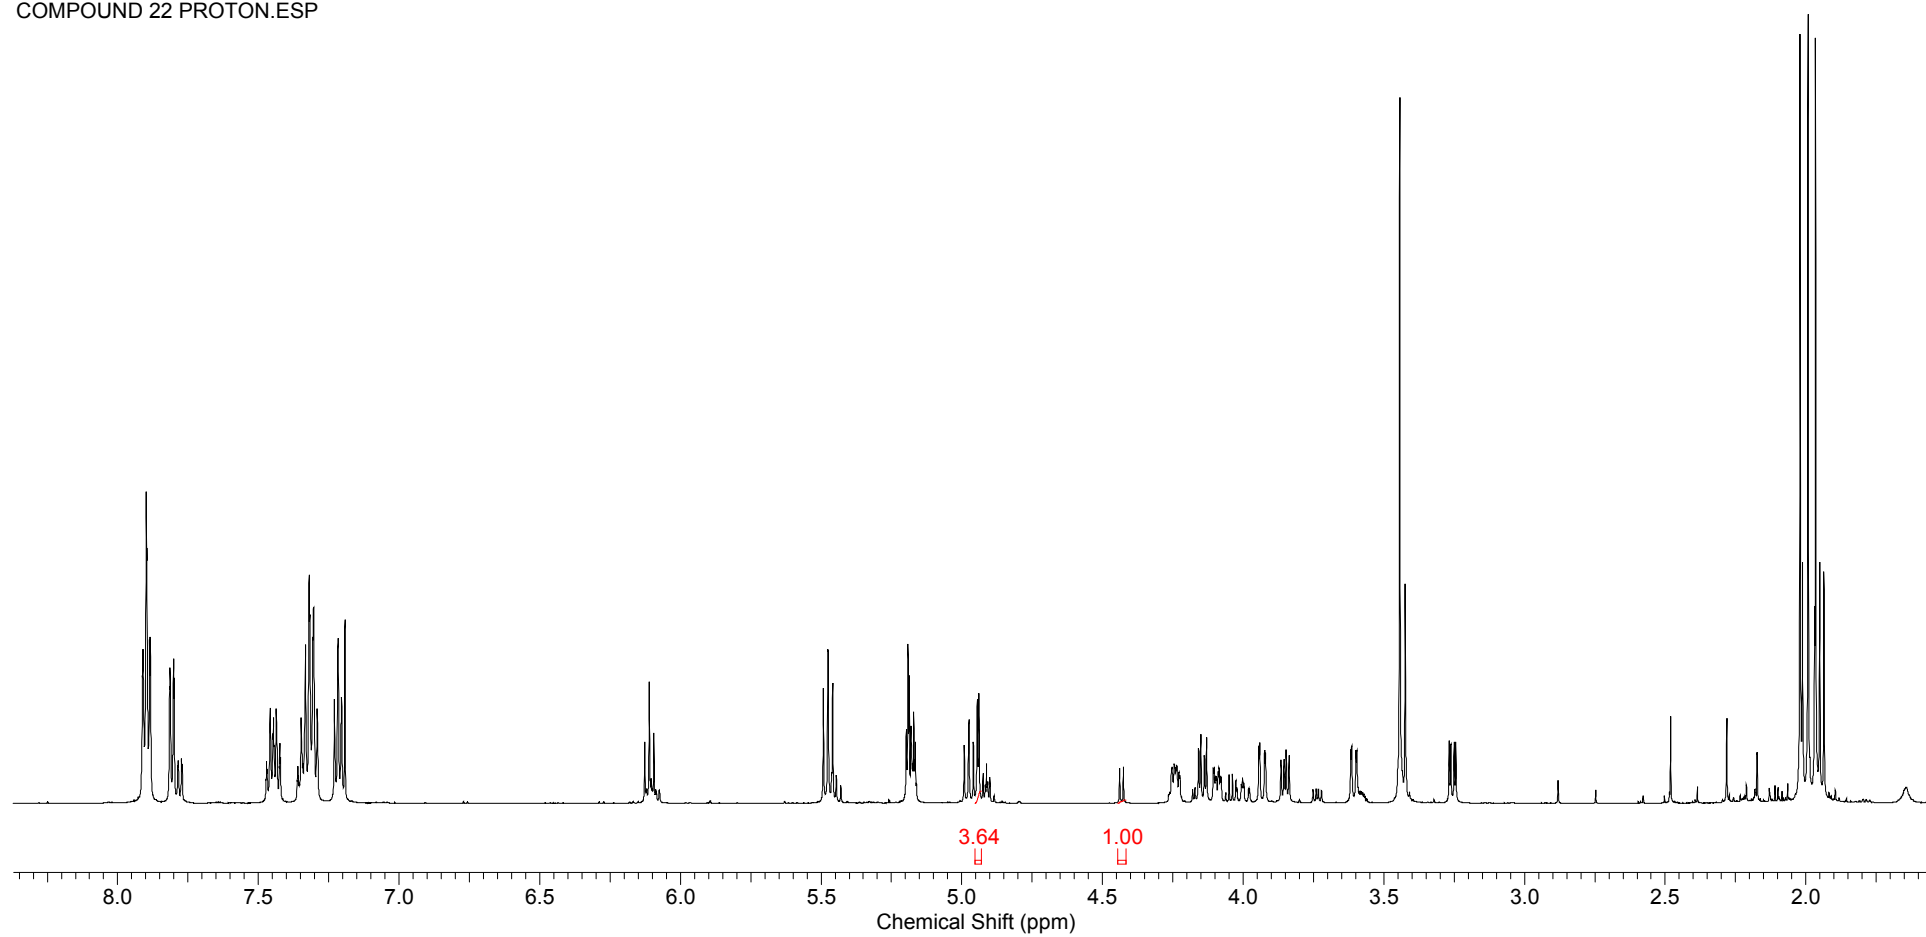

COMPOUND 22 CARBON.ESP

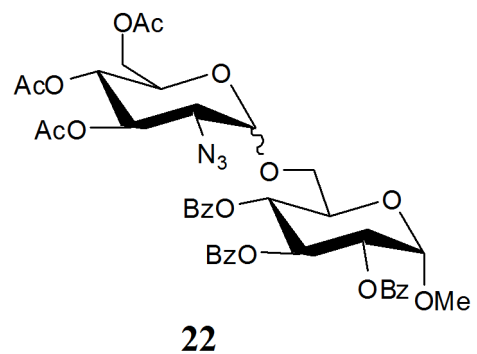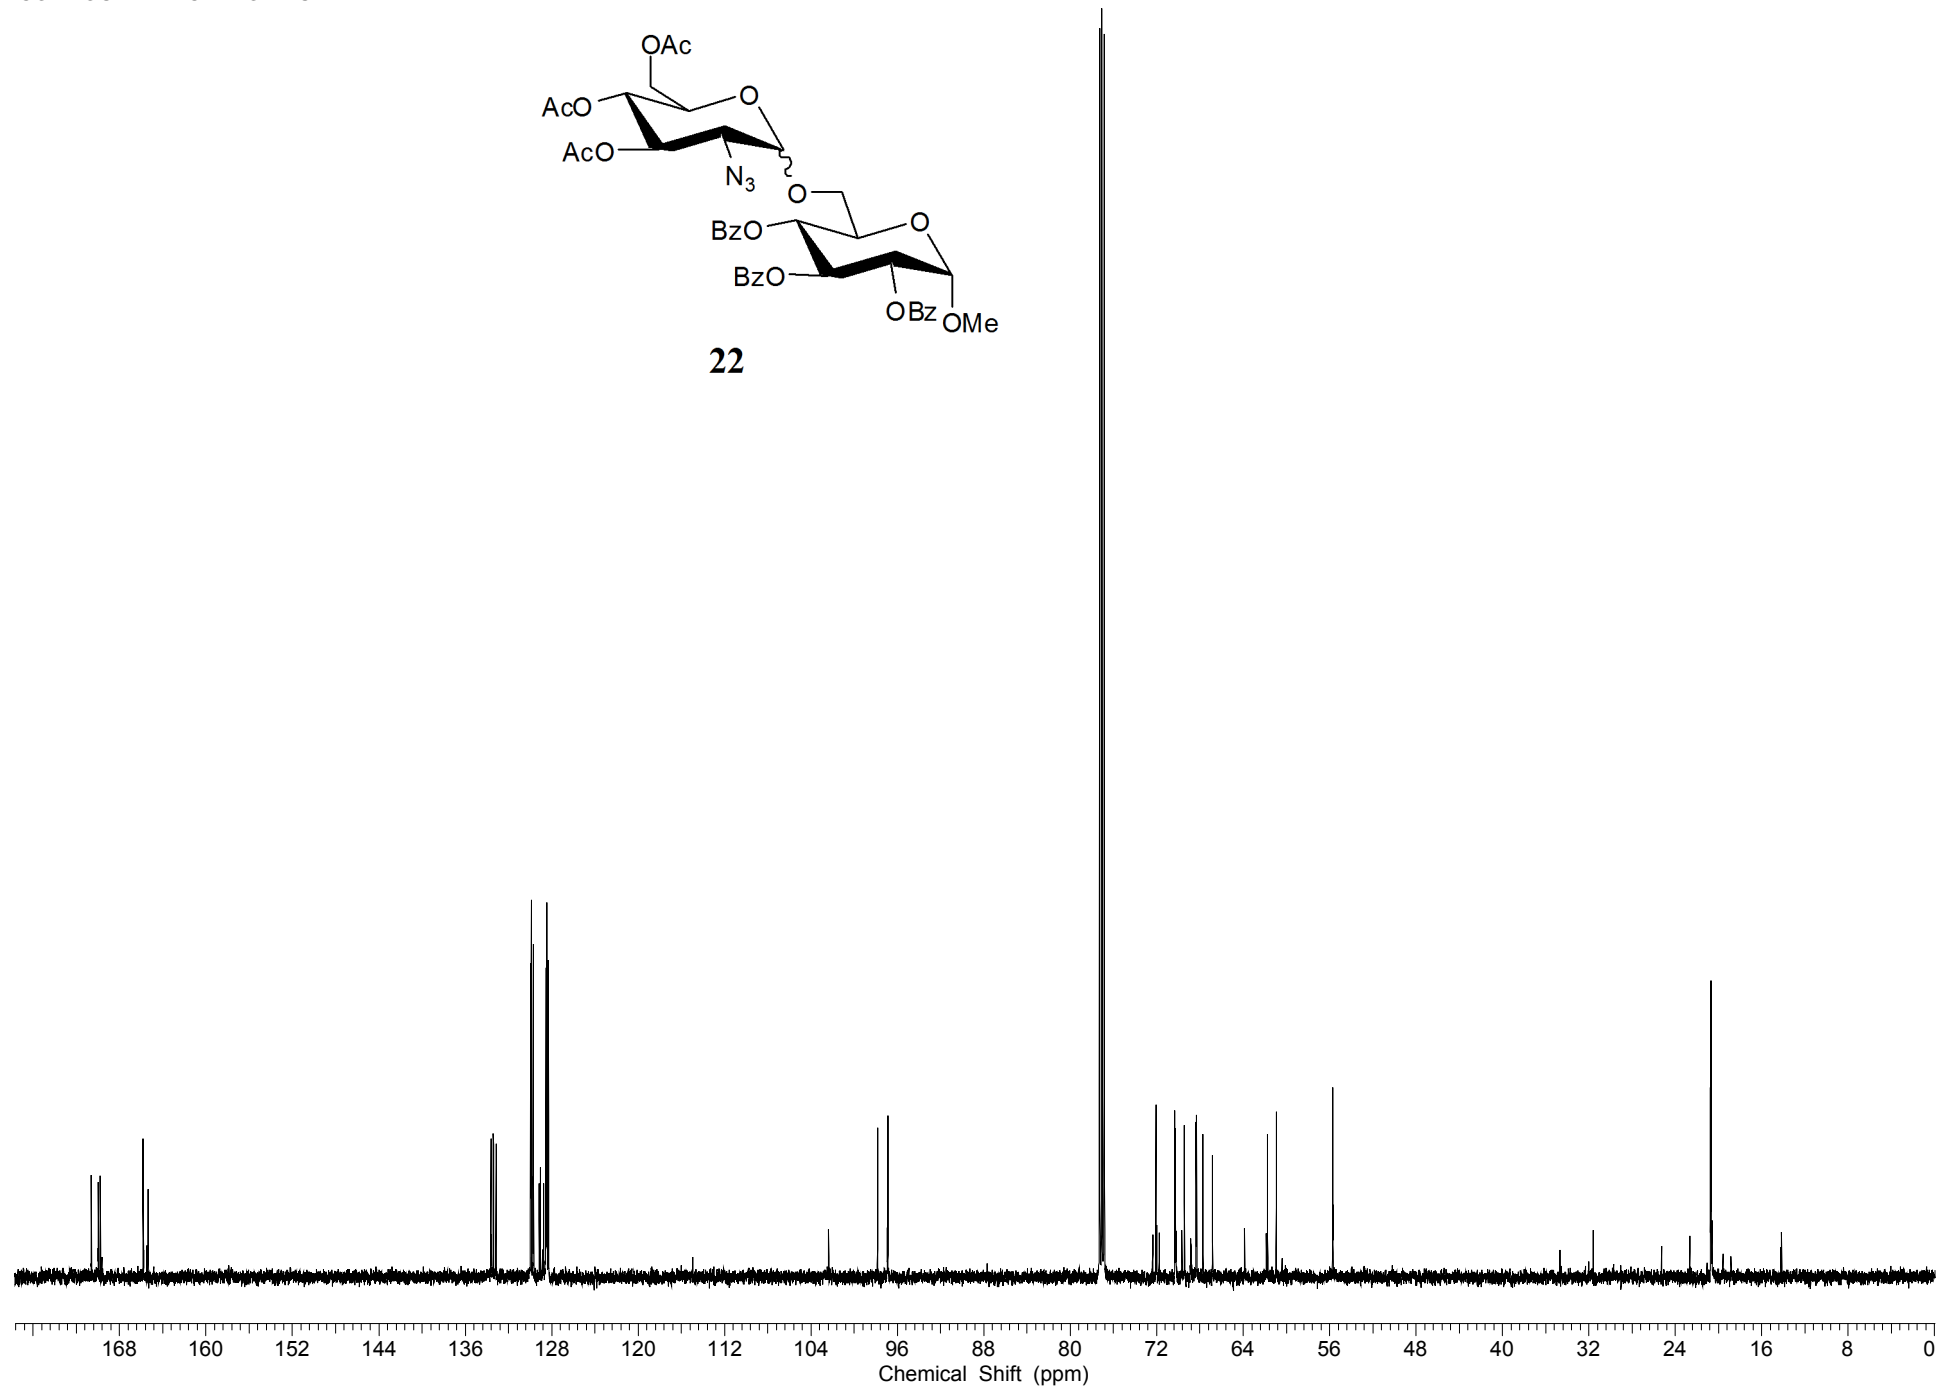

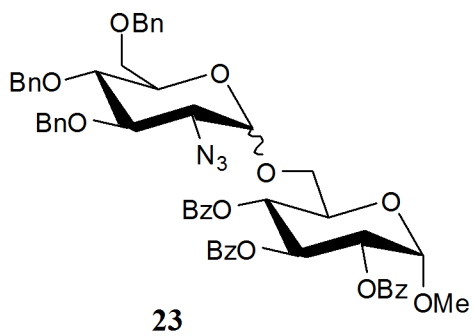

COMPOUND 23 PROTON.ESP

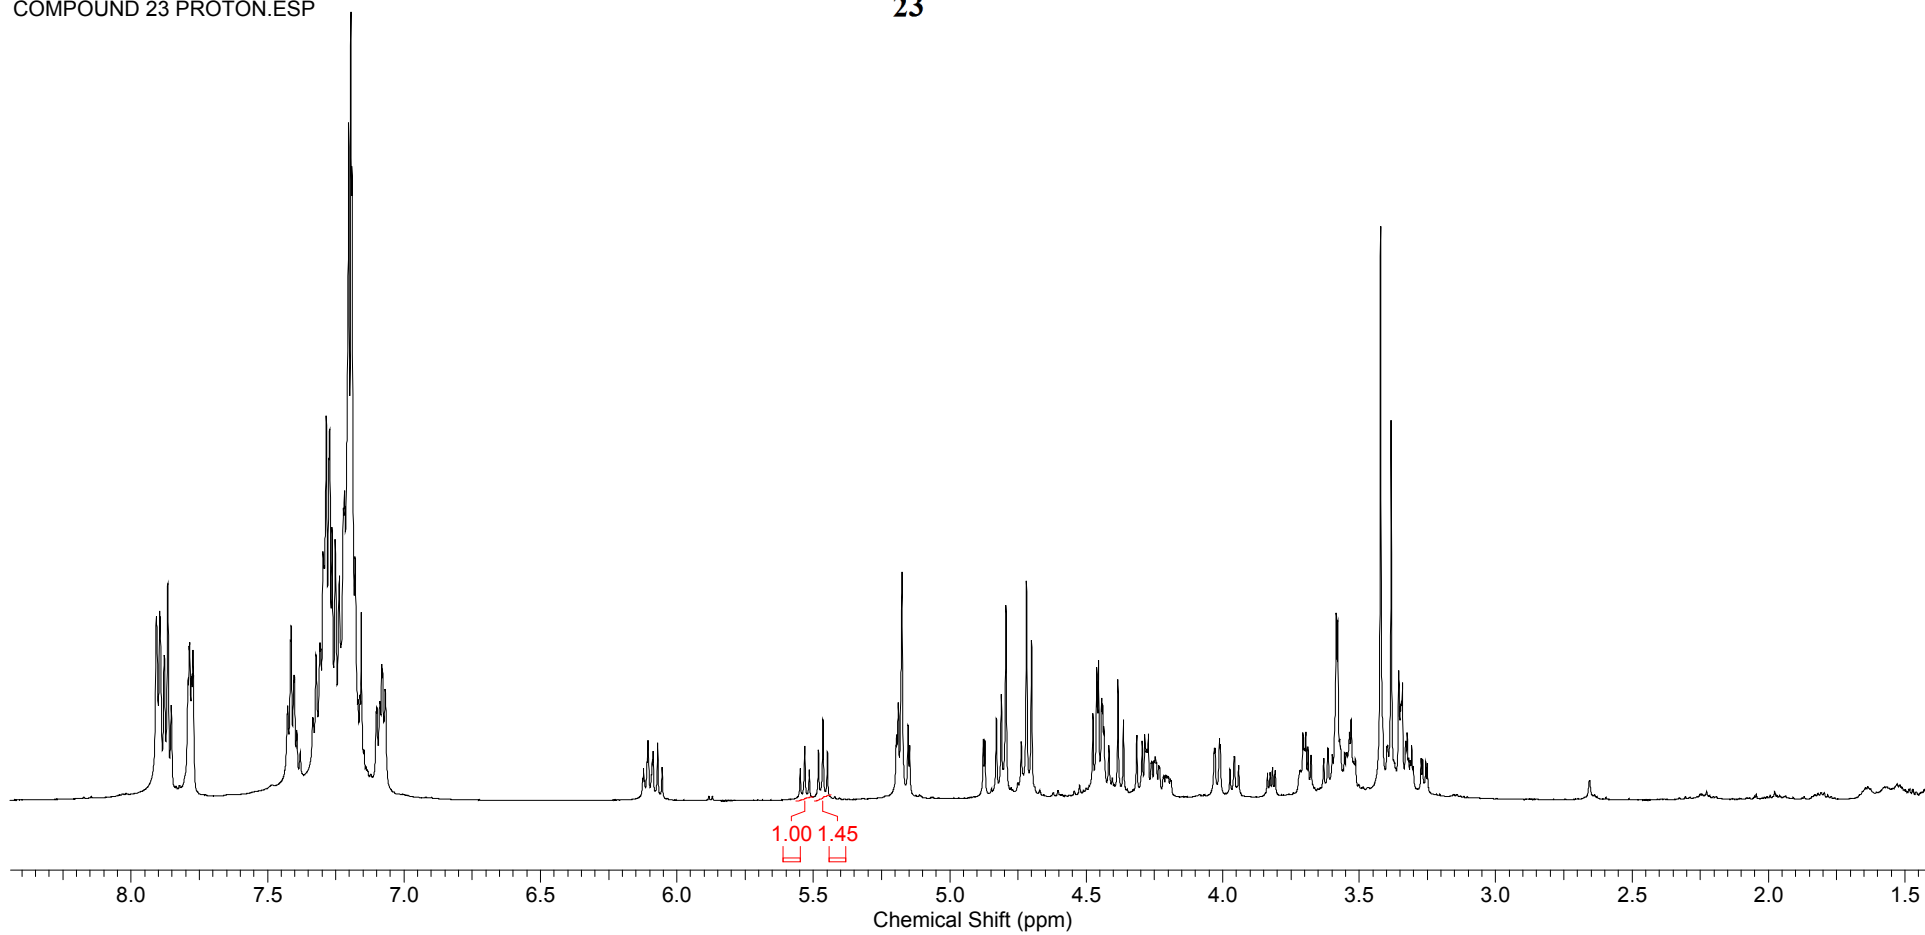

COMPOUND 23 CARBON.ESP

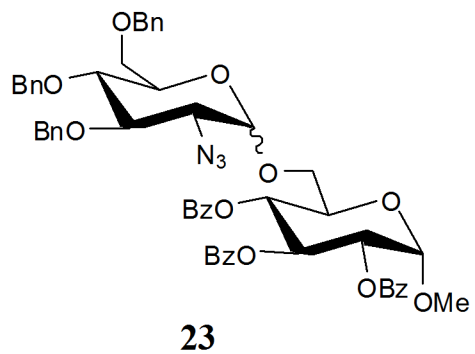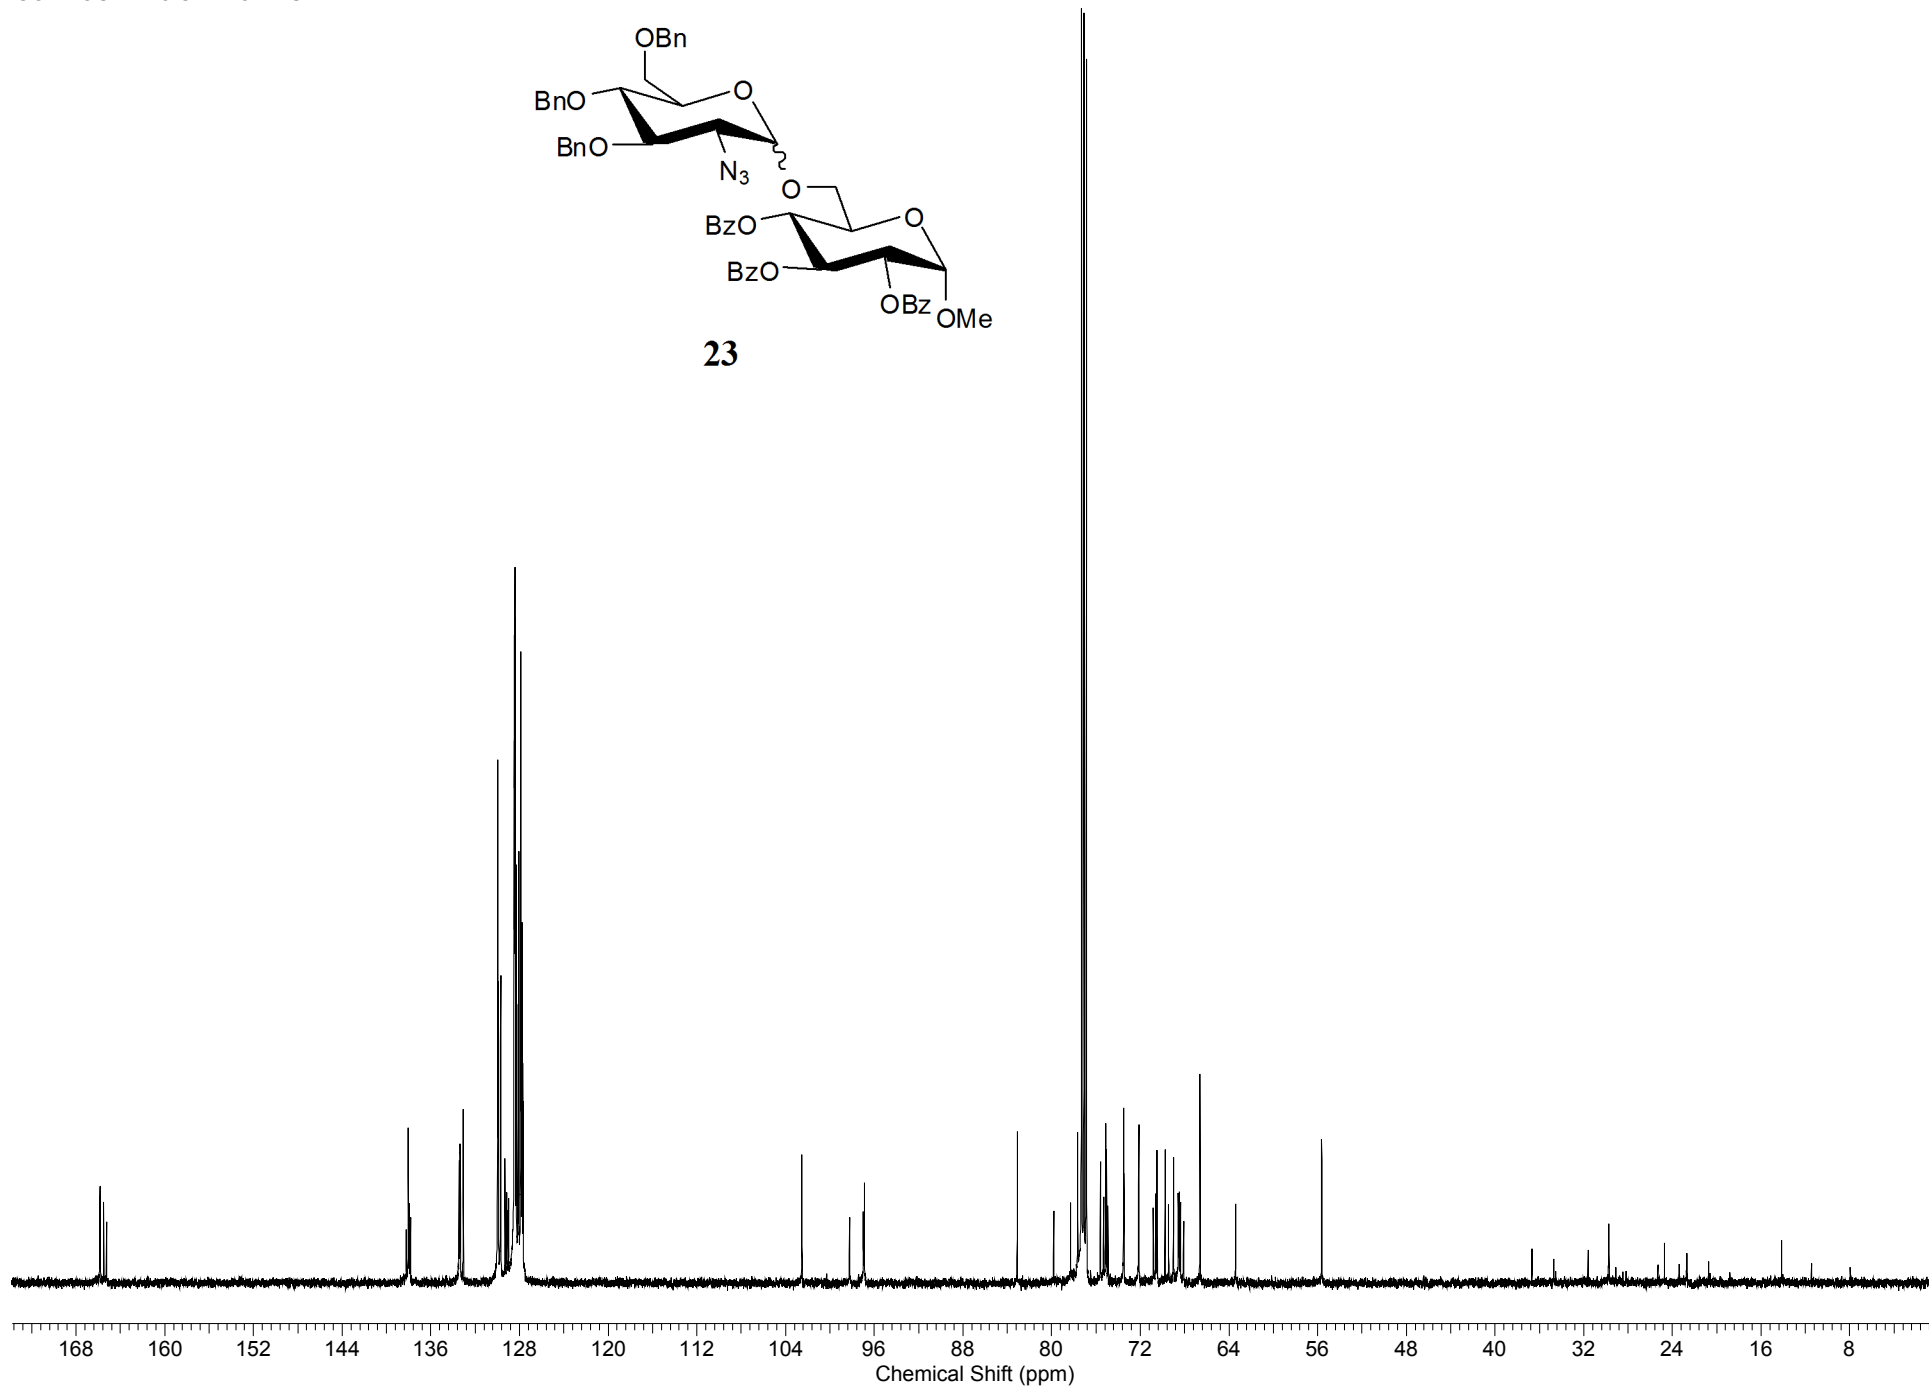



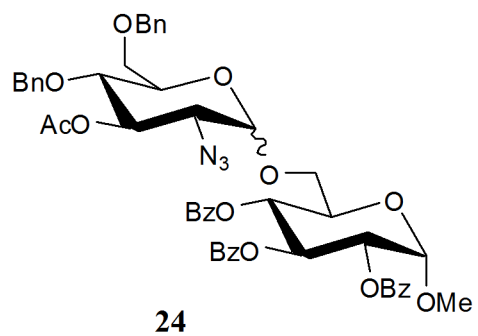

COMPOUND 24 PROTON .ESP

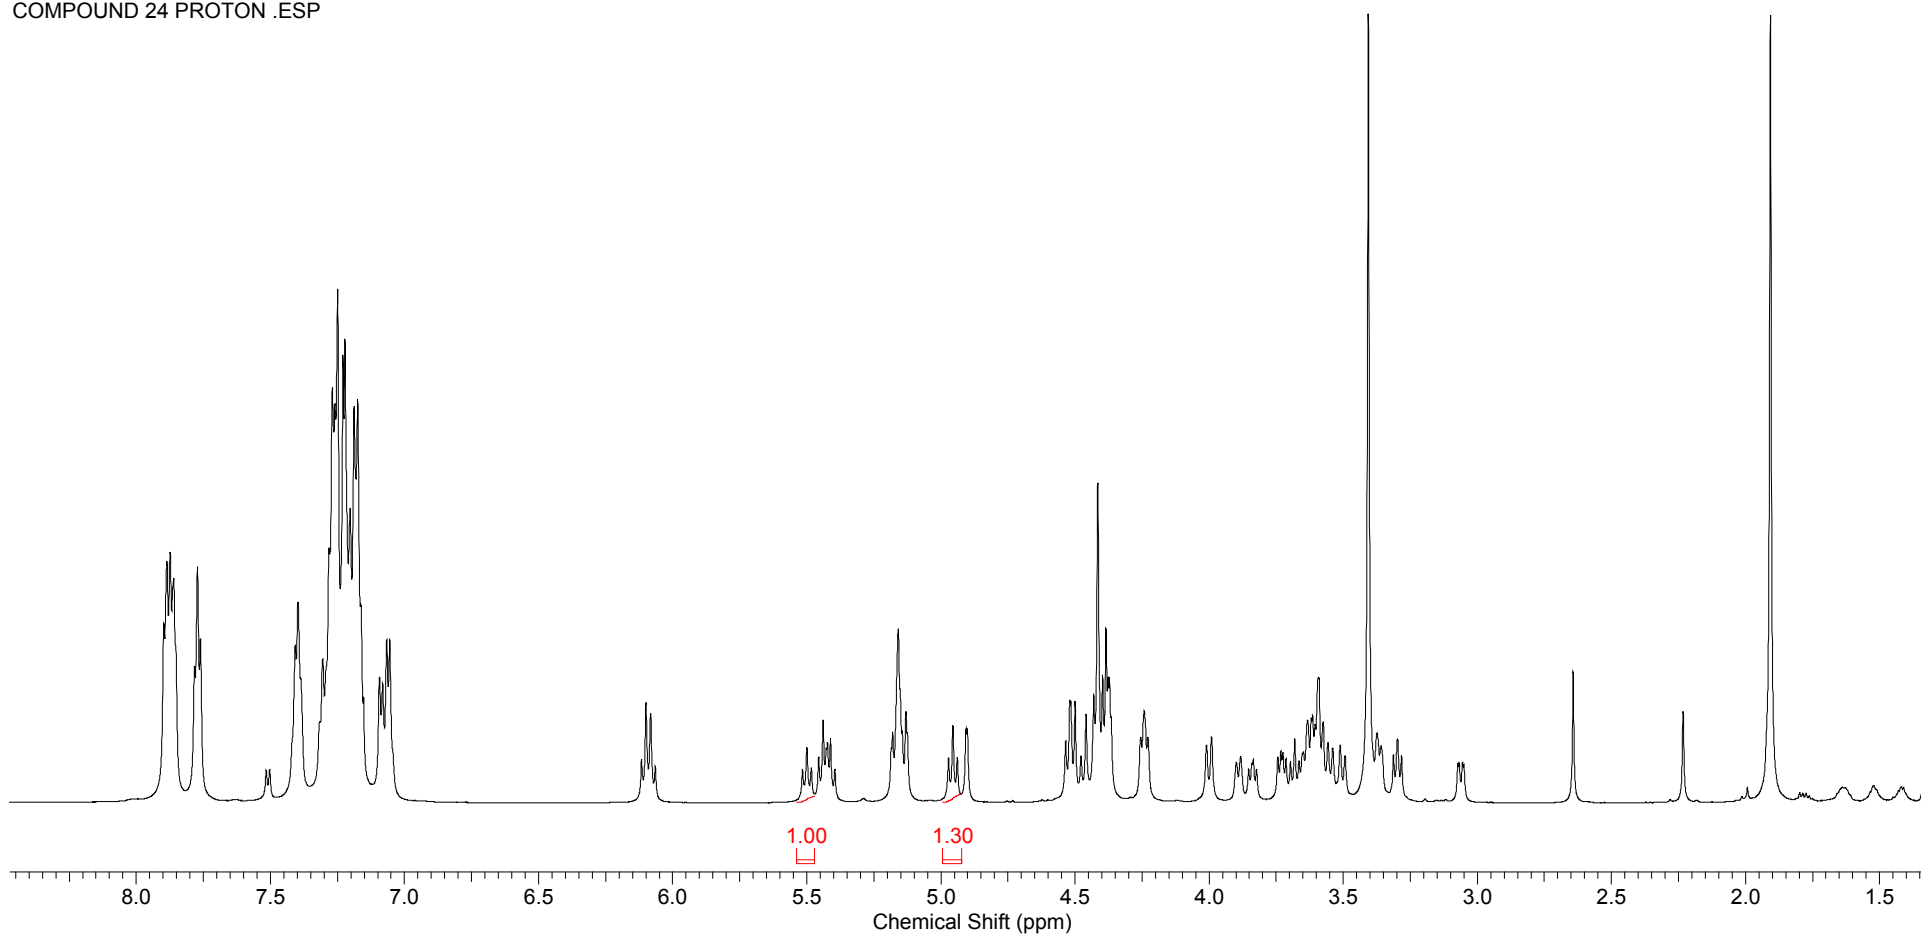

COMPOUND 24 CARBON.ESP

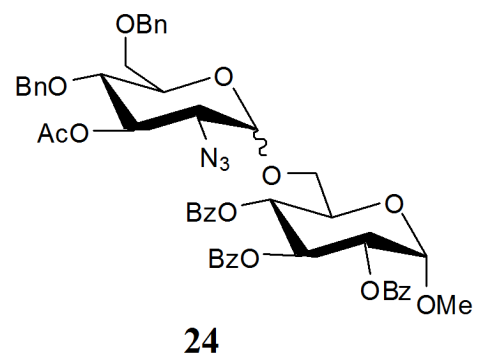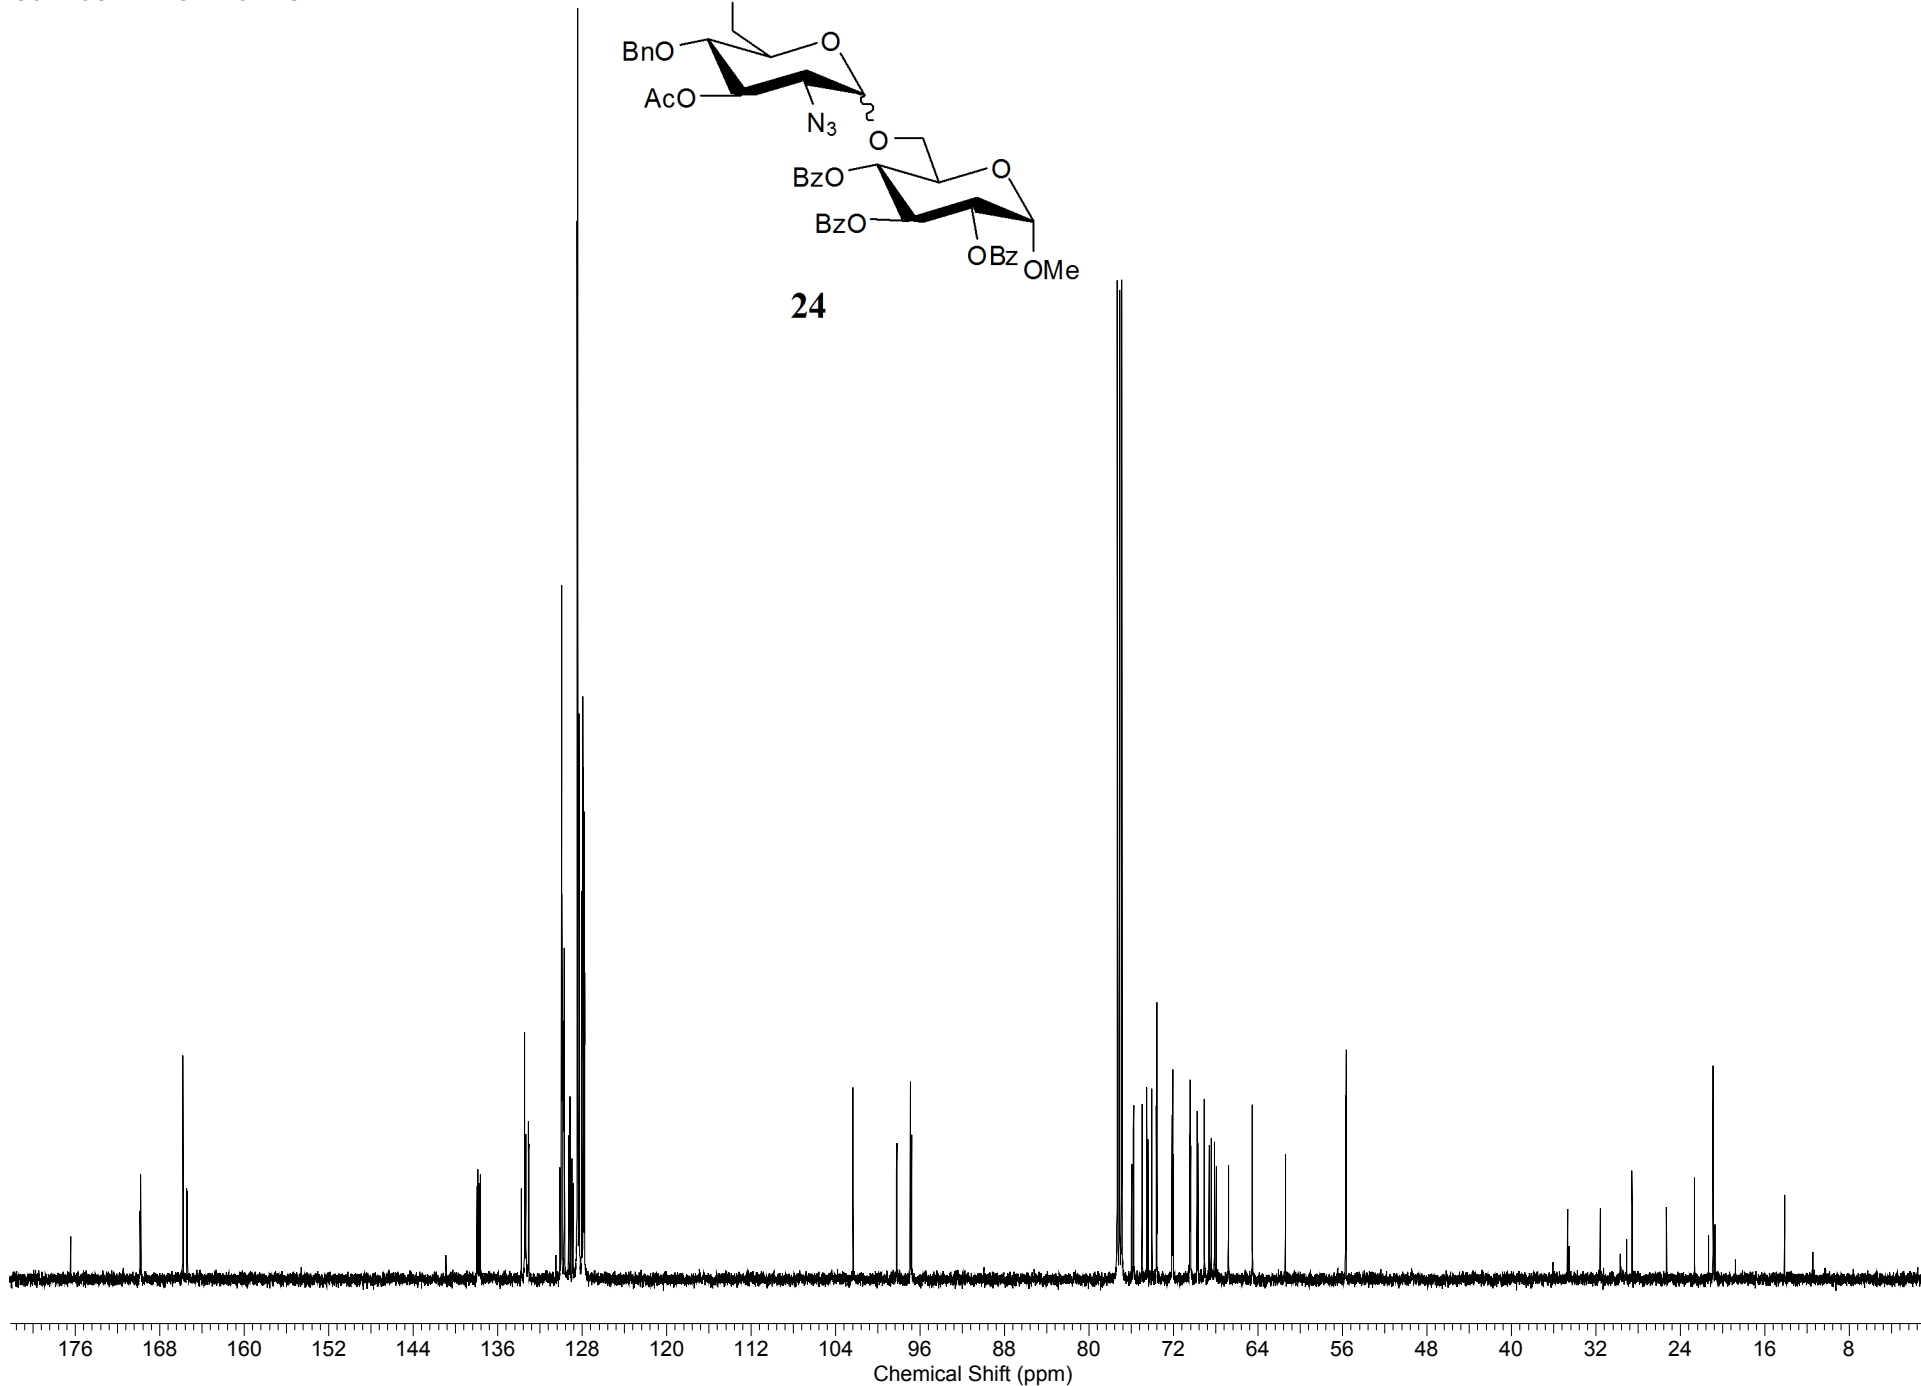

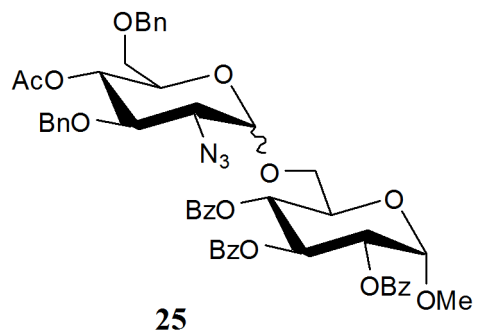

COMPOUND 25 PROTON.ESP

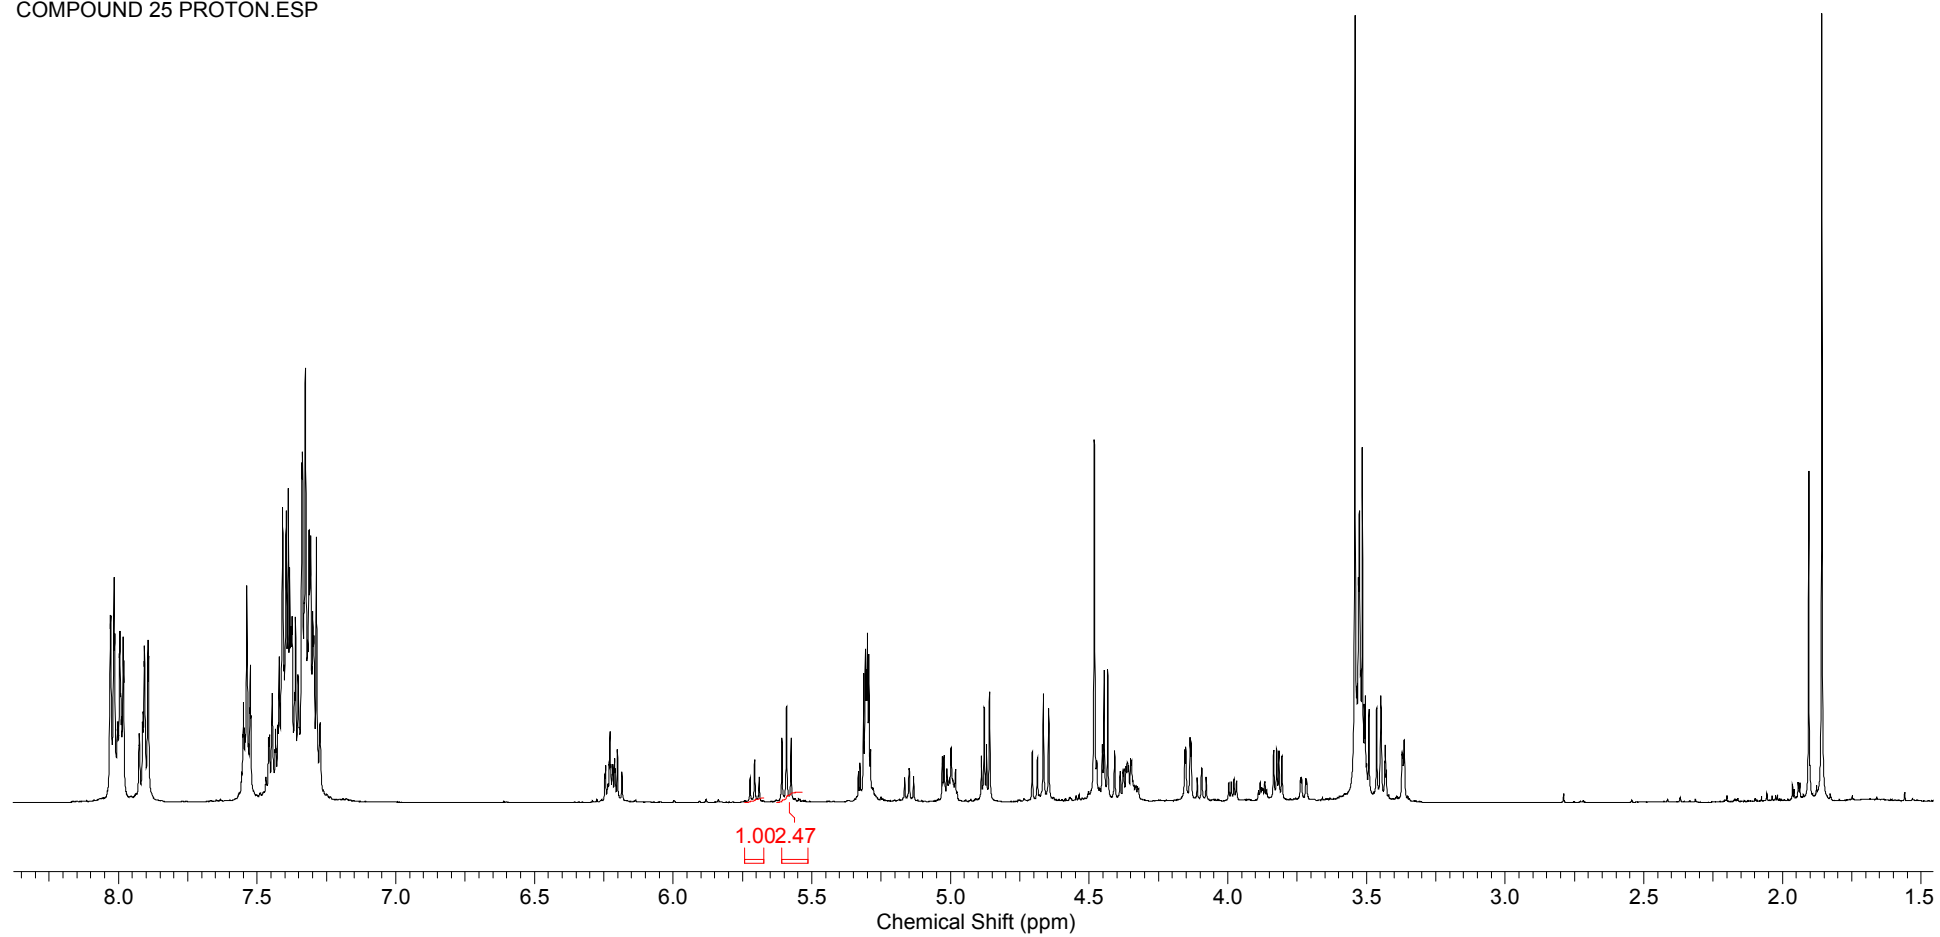

COMPOUND 25 CARBON.ESP

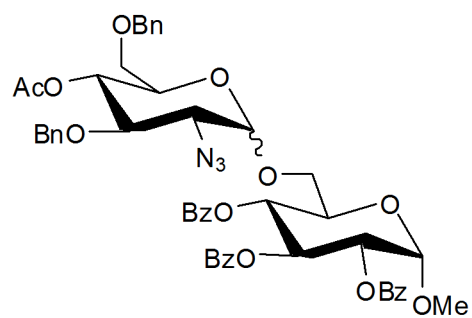

25

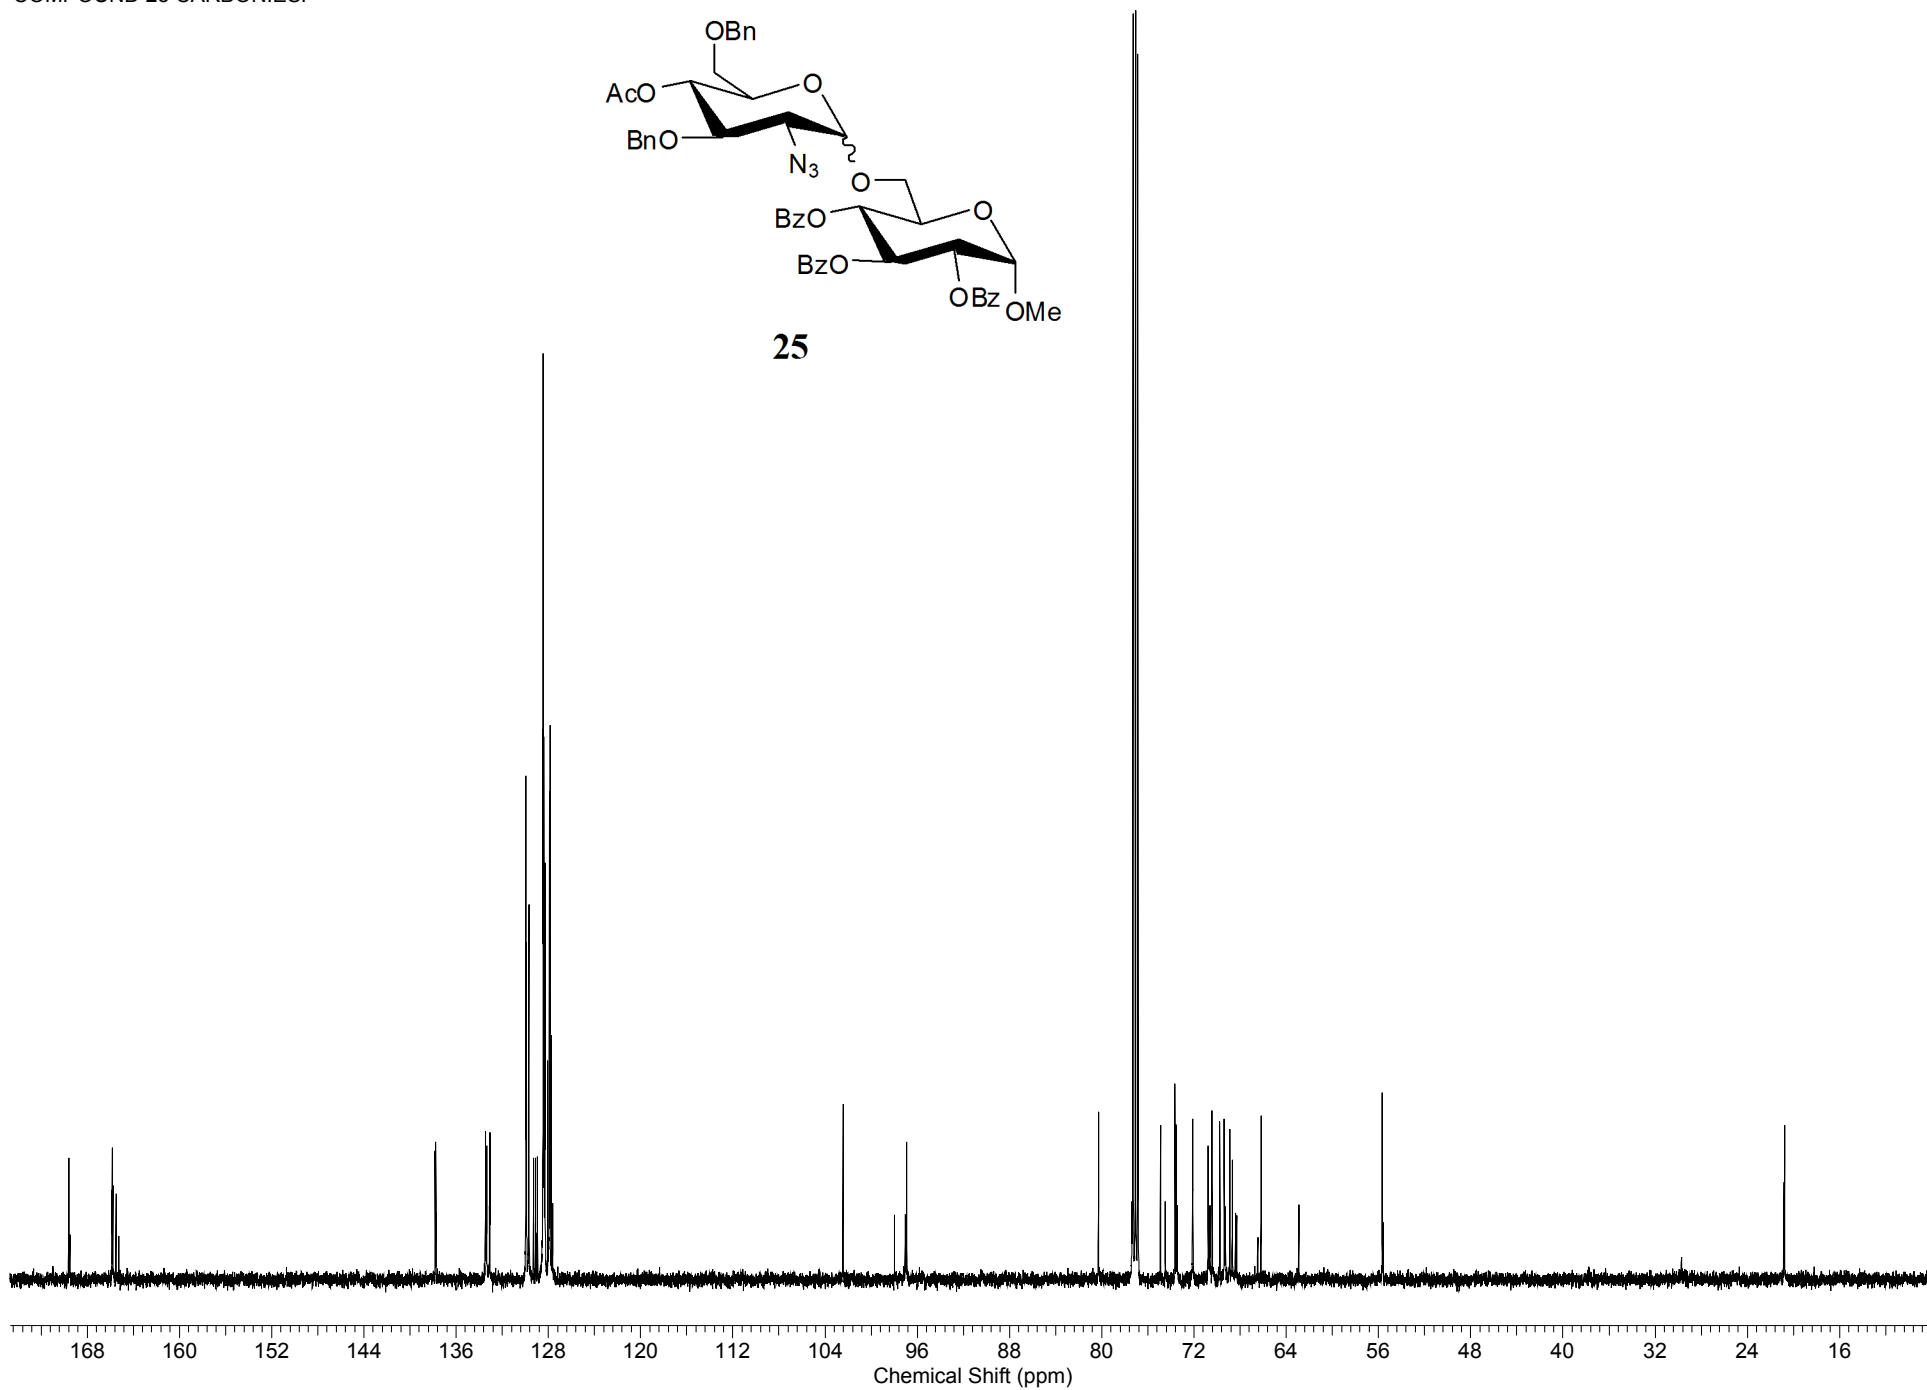

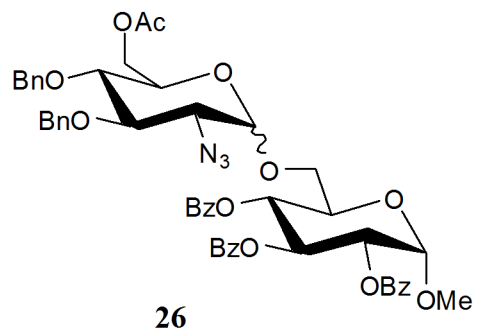

COMPOUND 26 PROTON.ESP

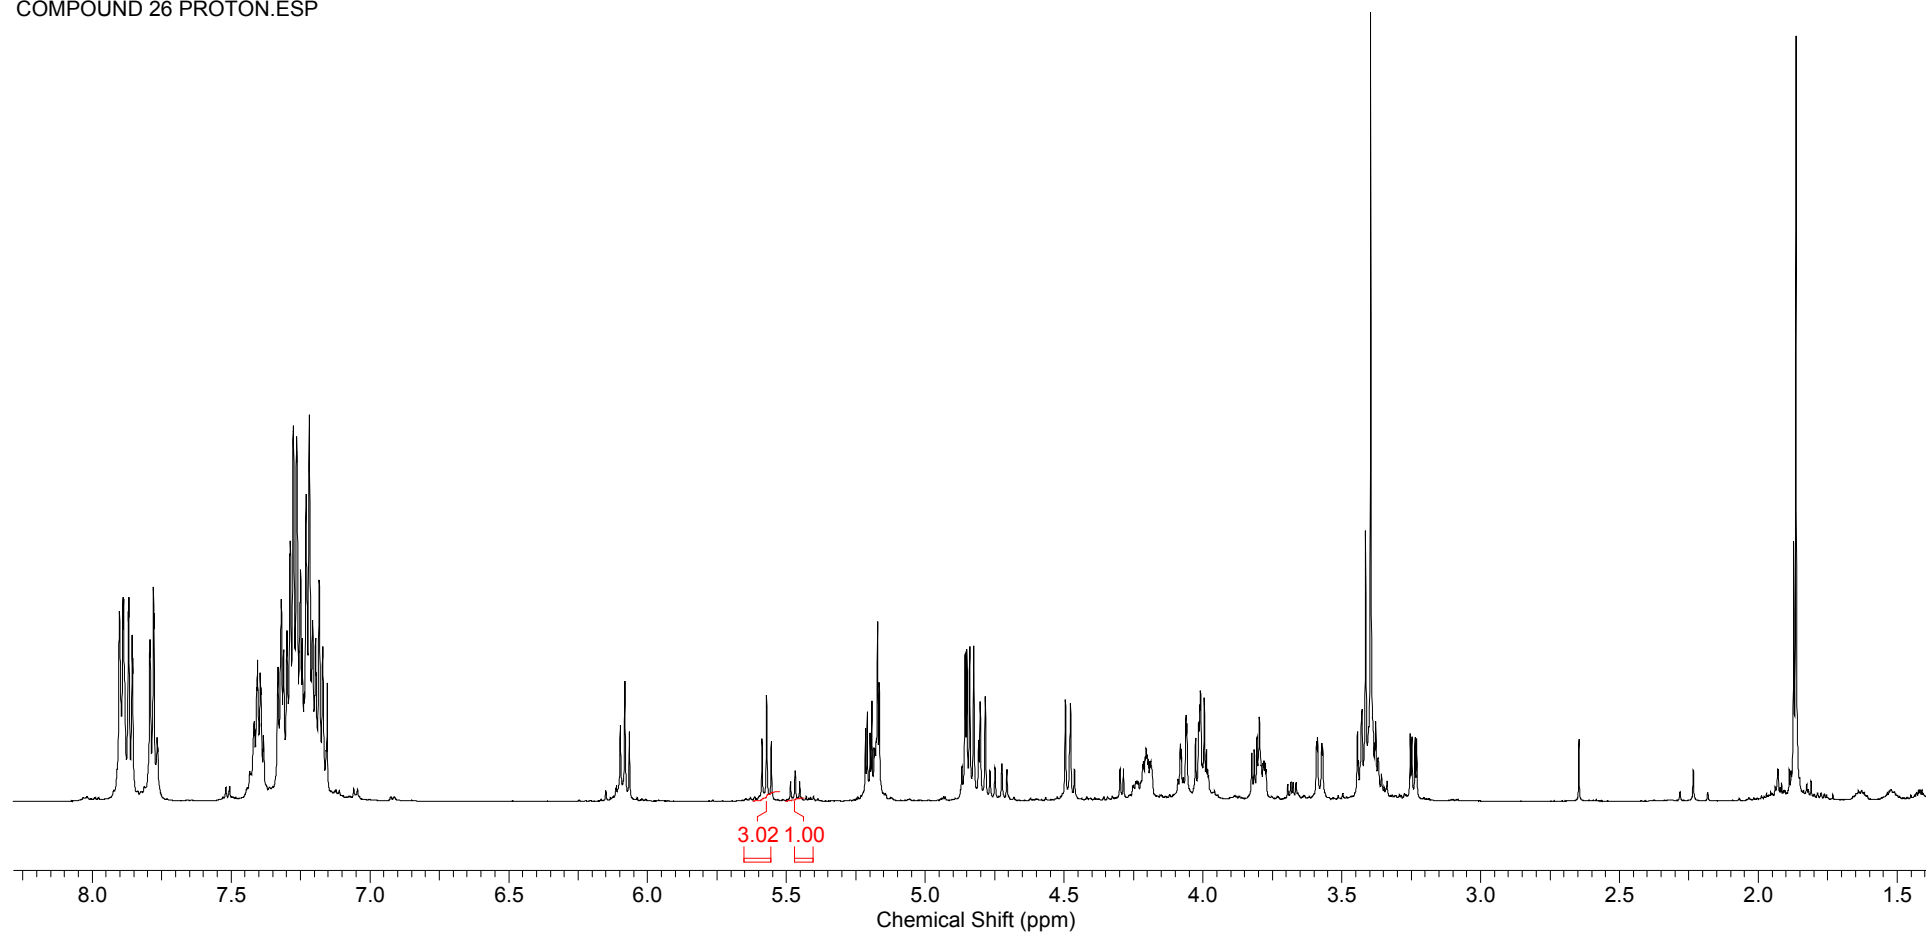

COMPOUND 26 CARBON.ESP

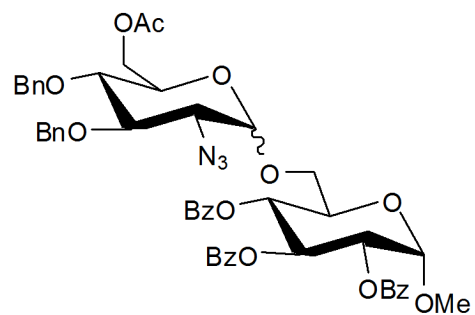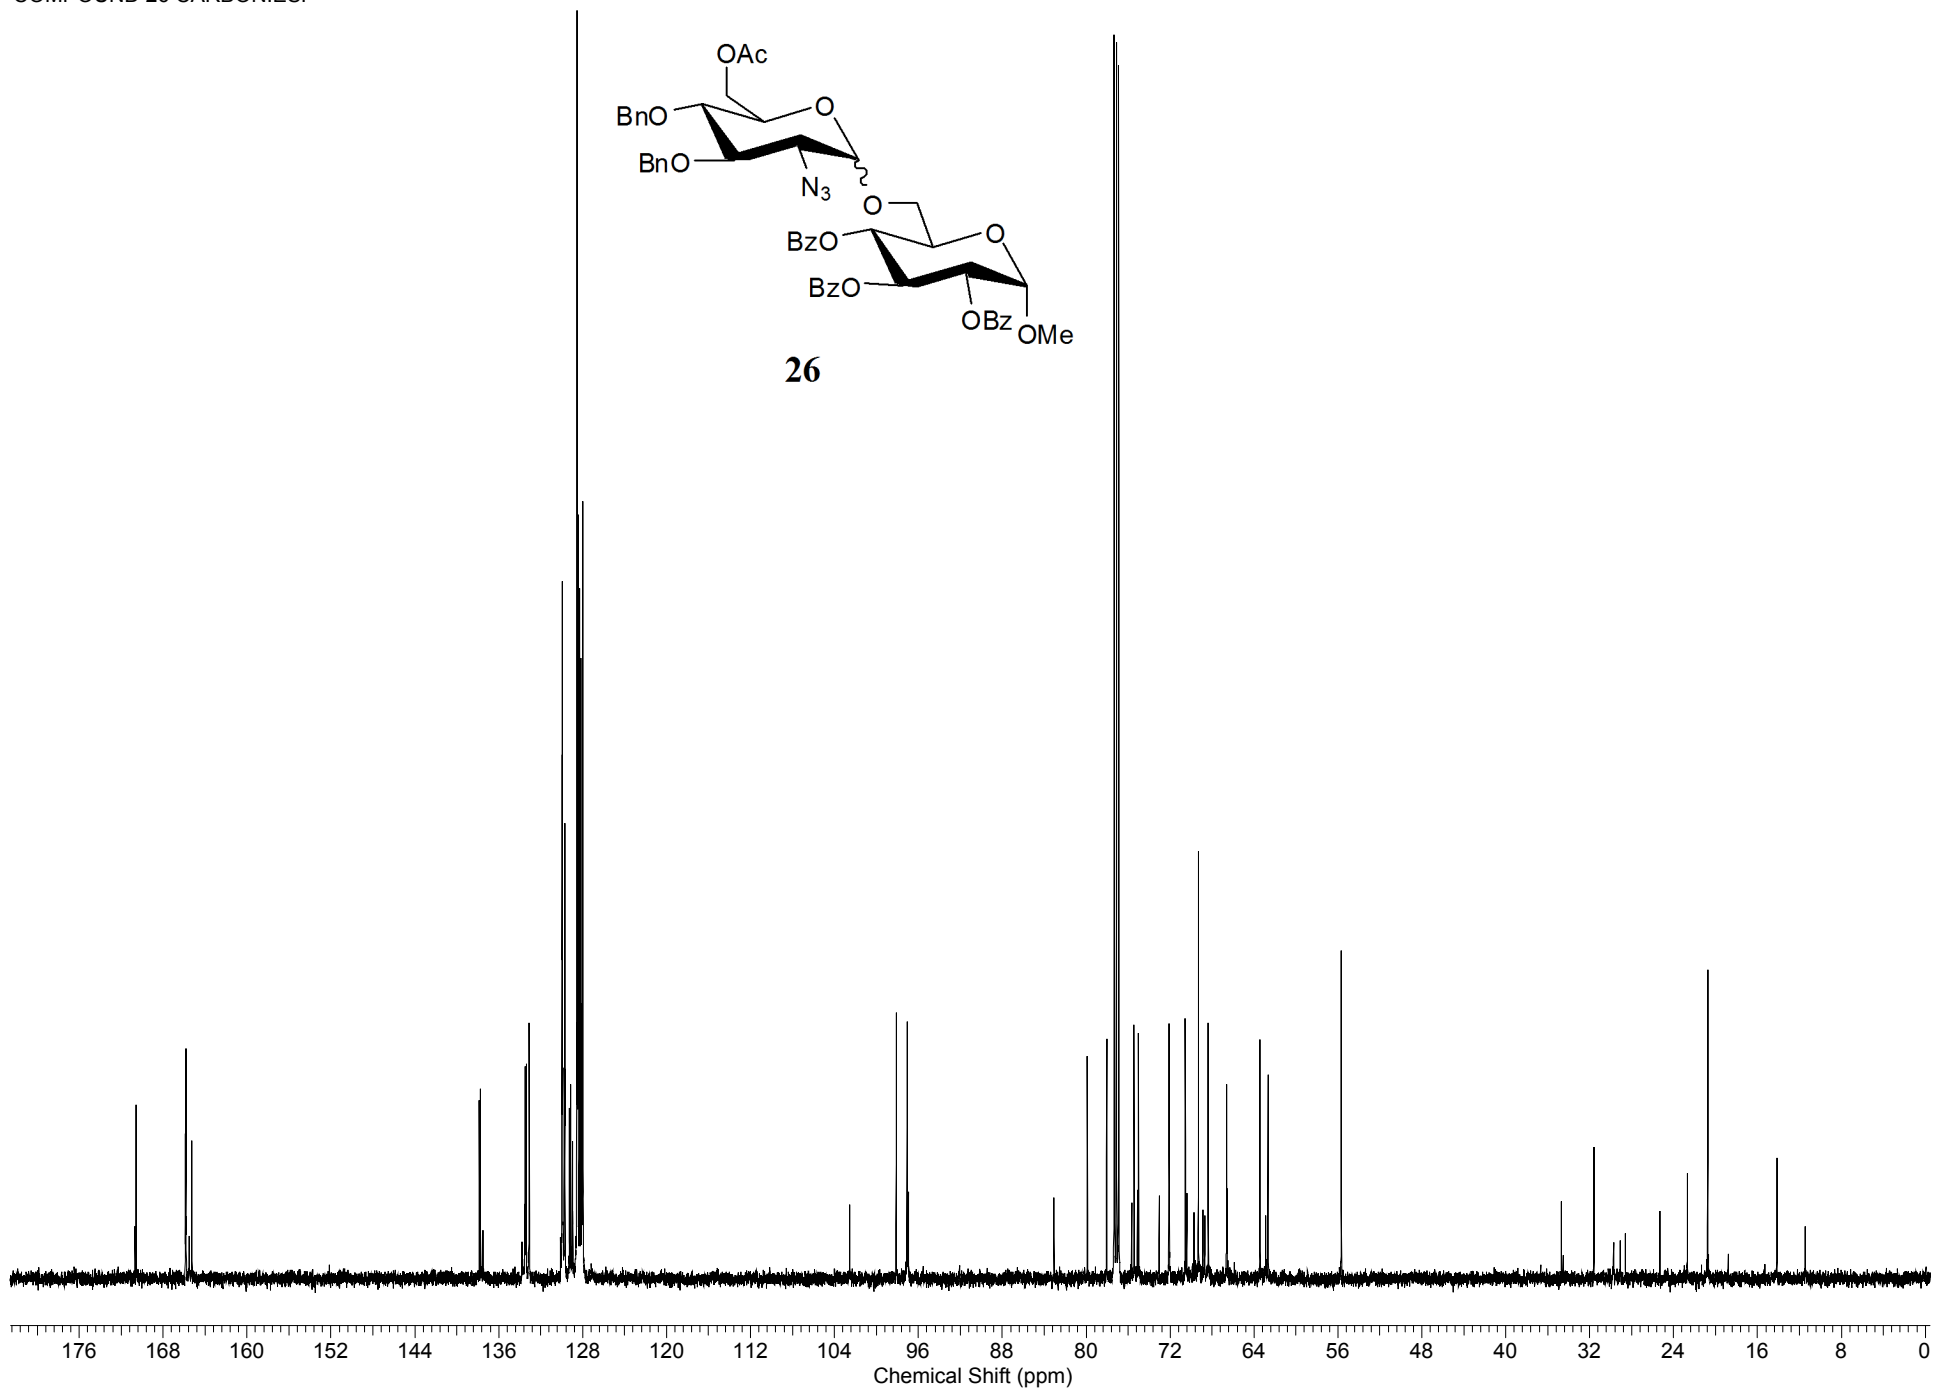

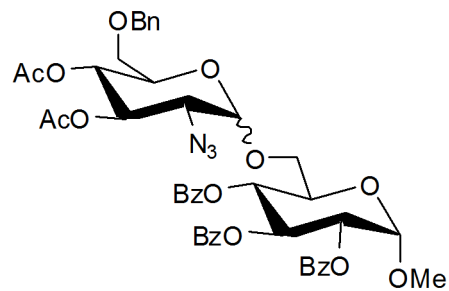

COMPOUND 27 PROTON.ESP

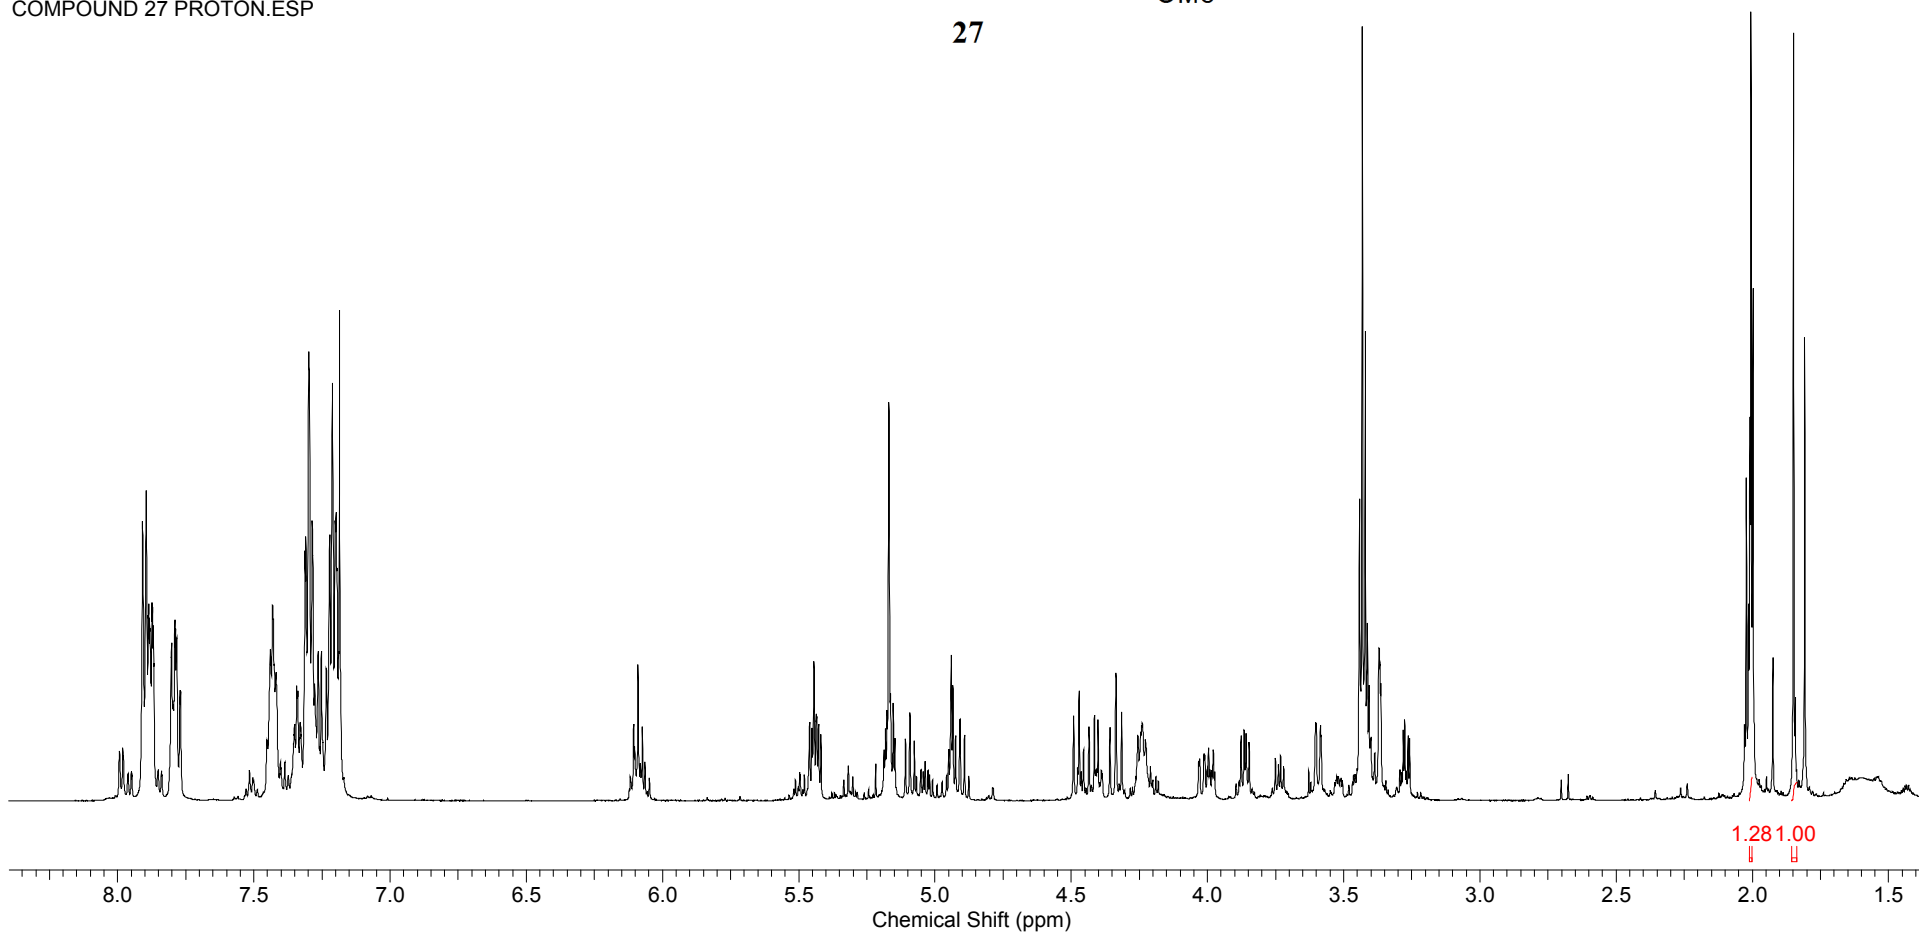

COMPOUND 27 CARBON.ESP

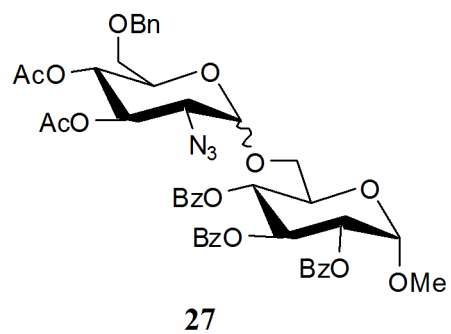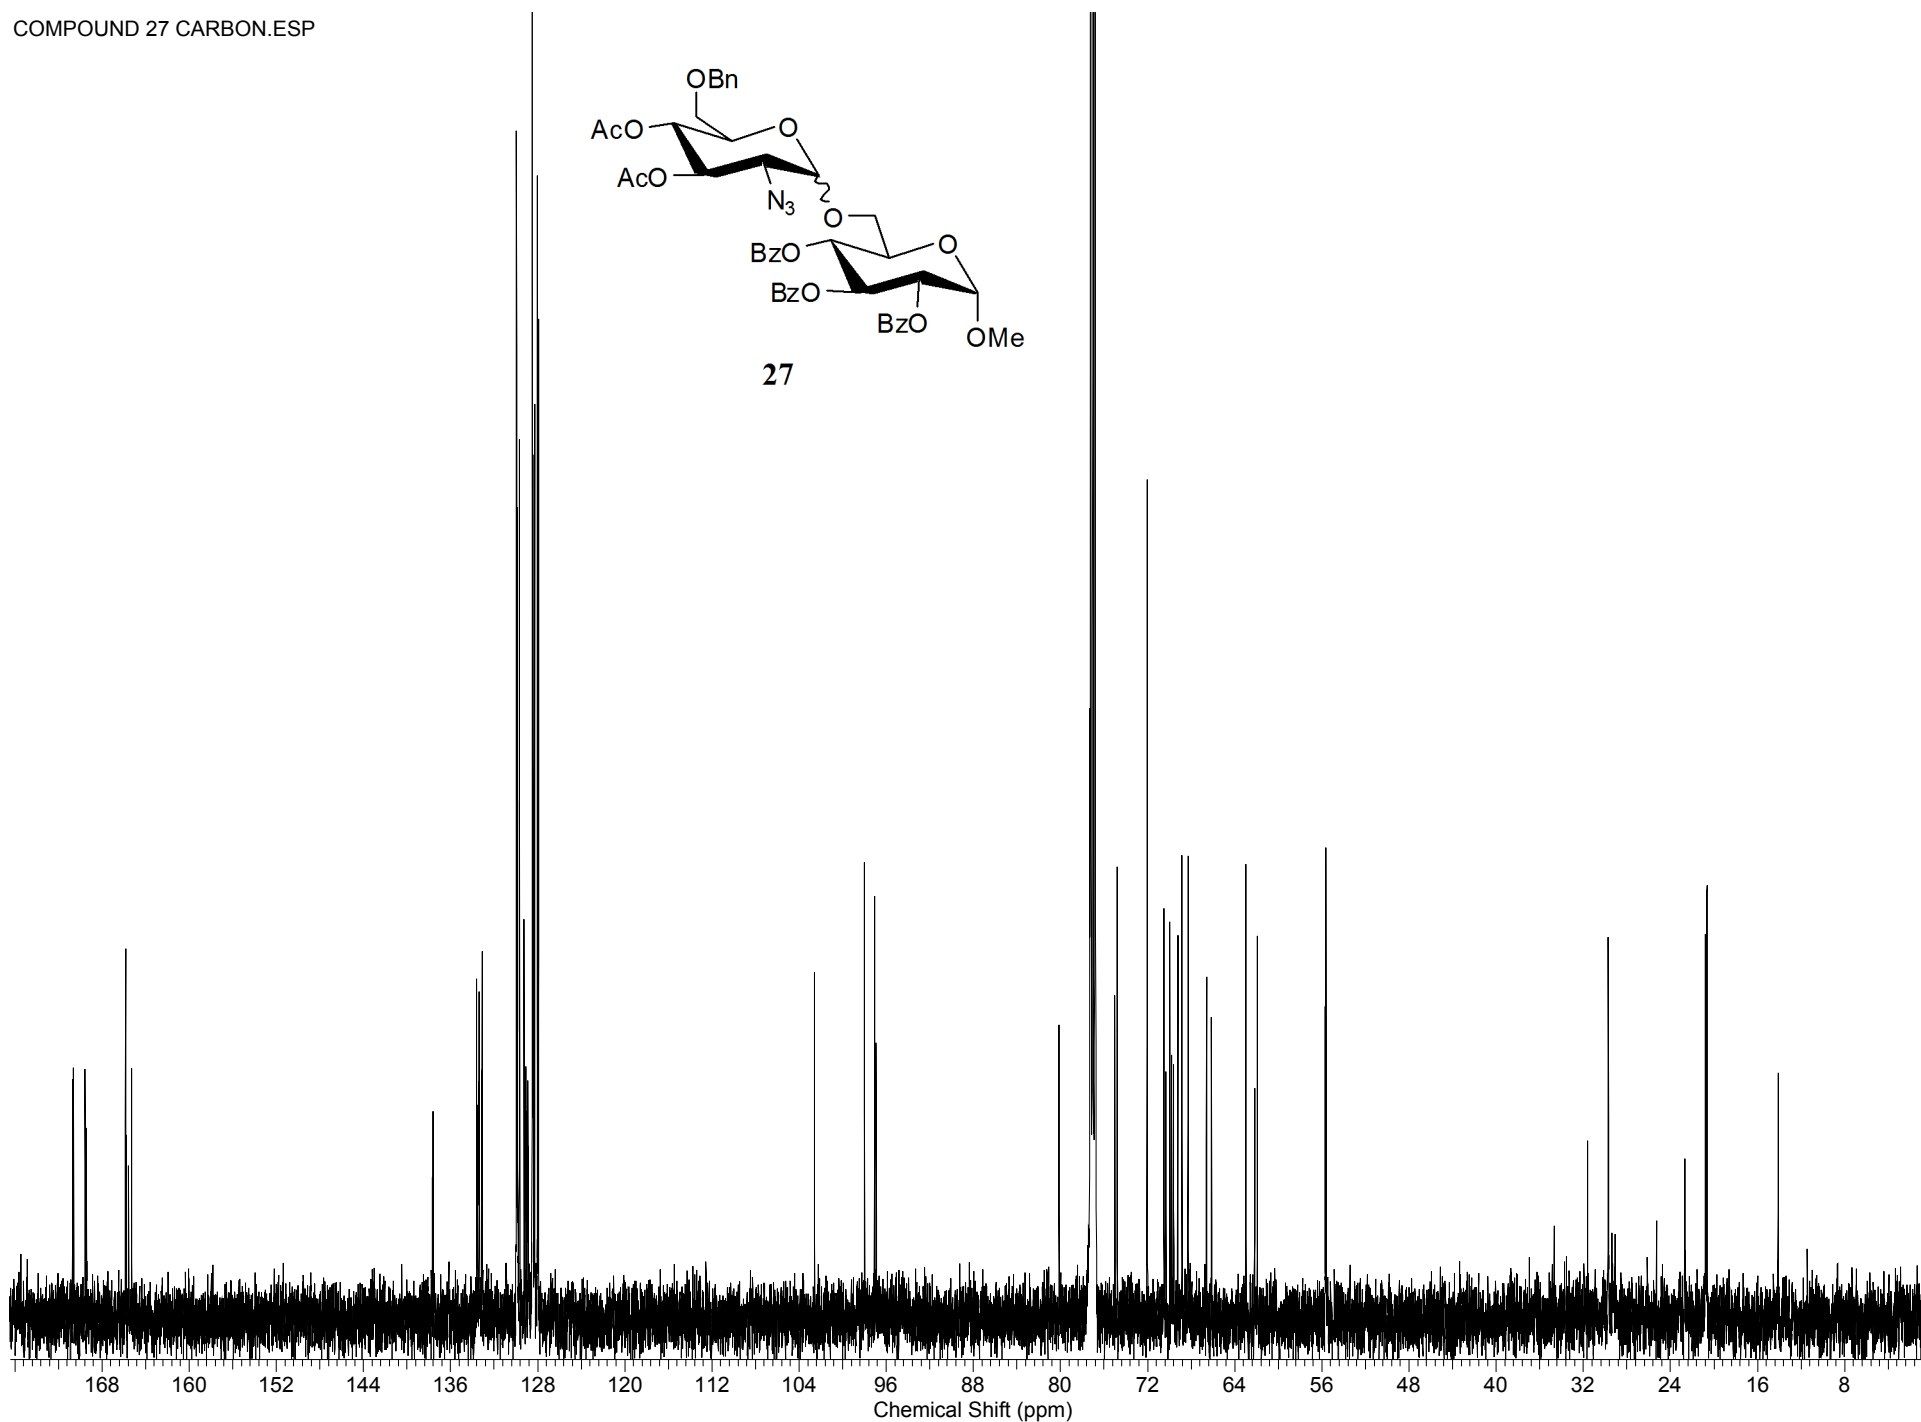



Compound 28 proton .esp

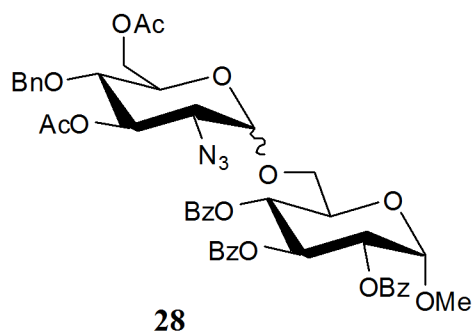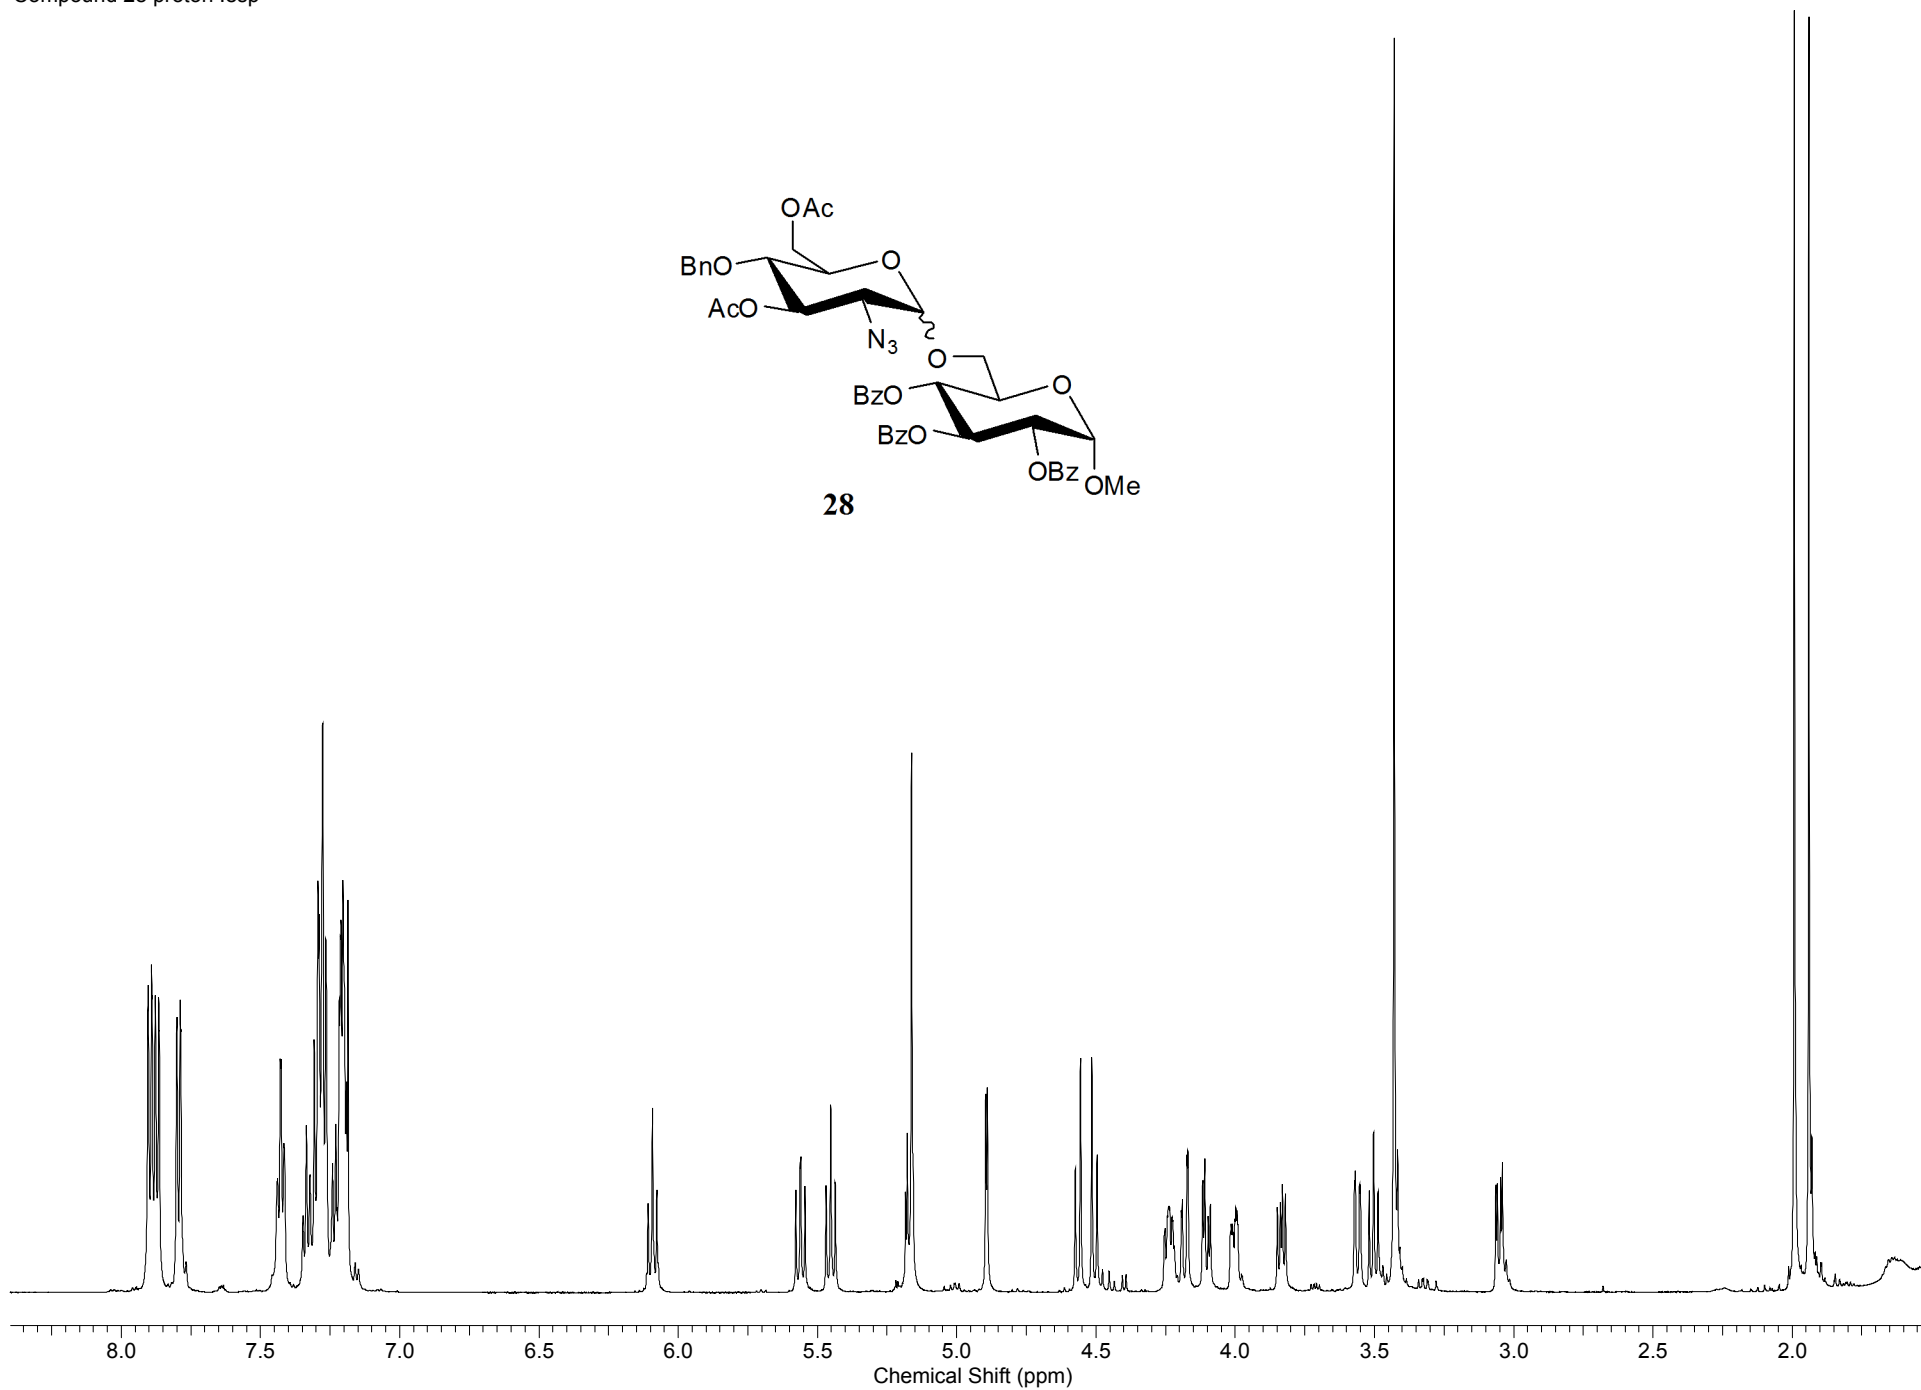

COMPOUND 28 CARBON.ESP

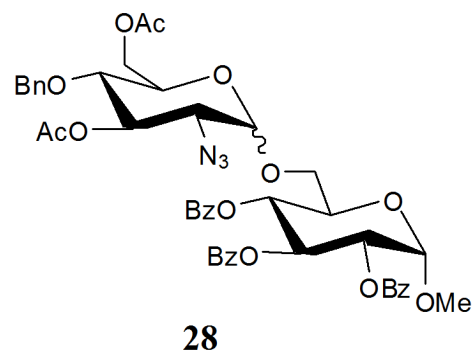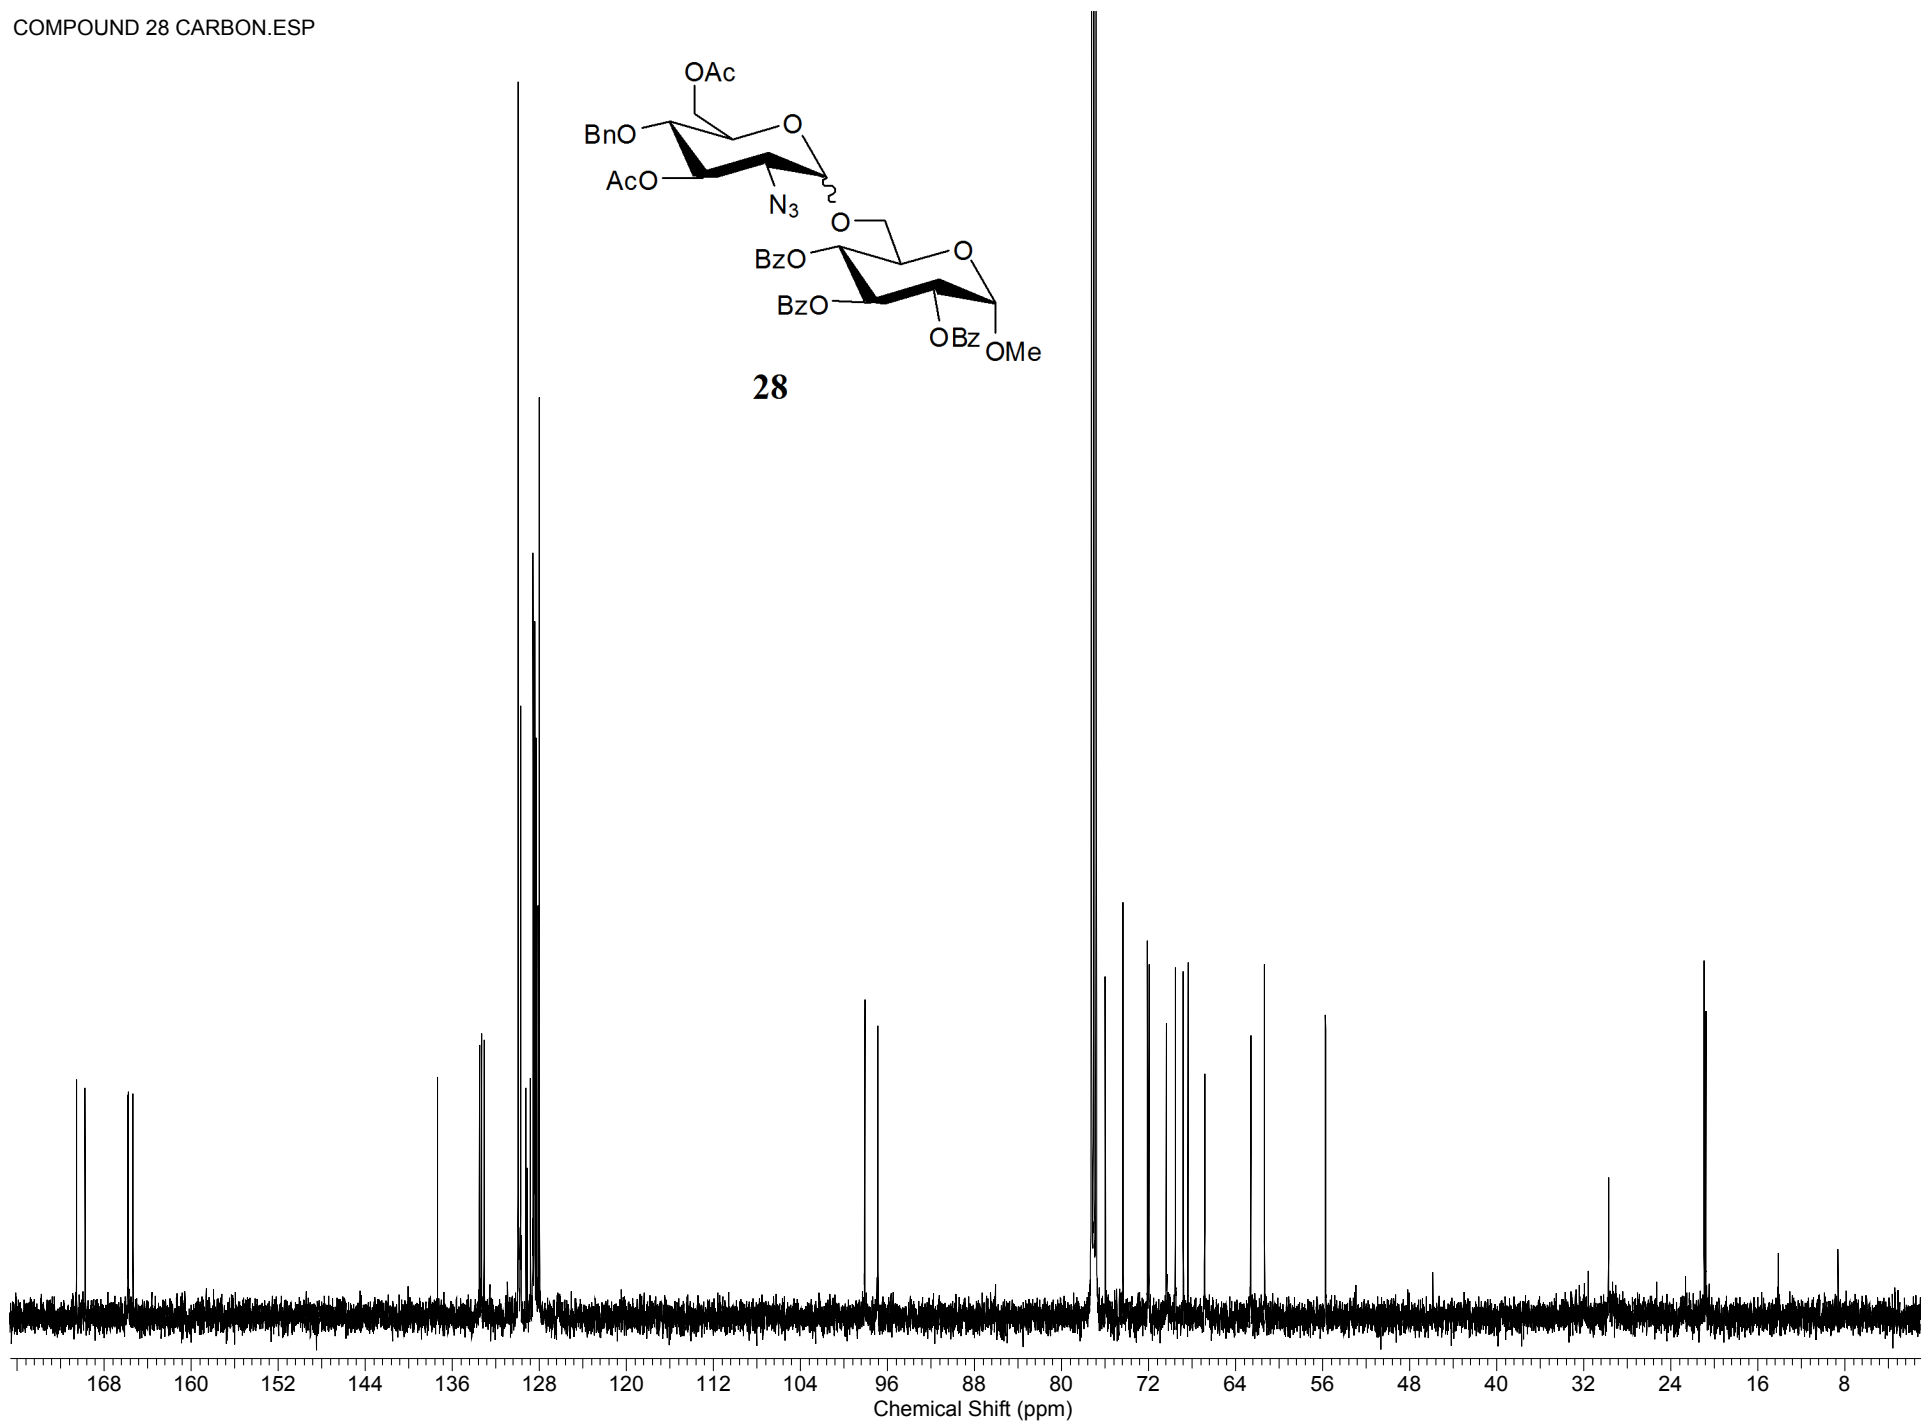

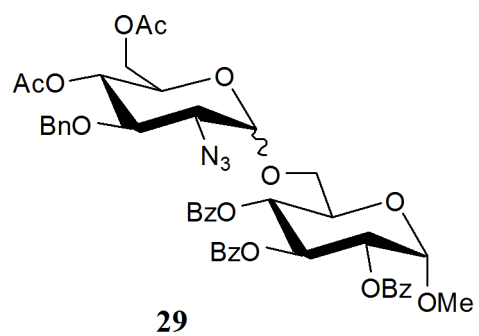

COMPOUND 29 PROTON.ESP

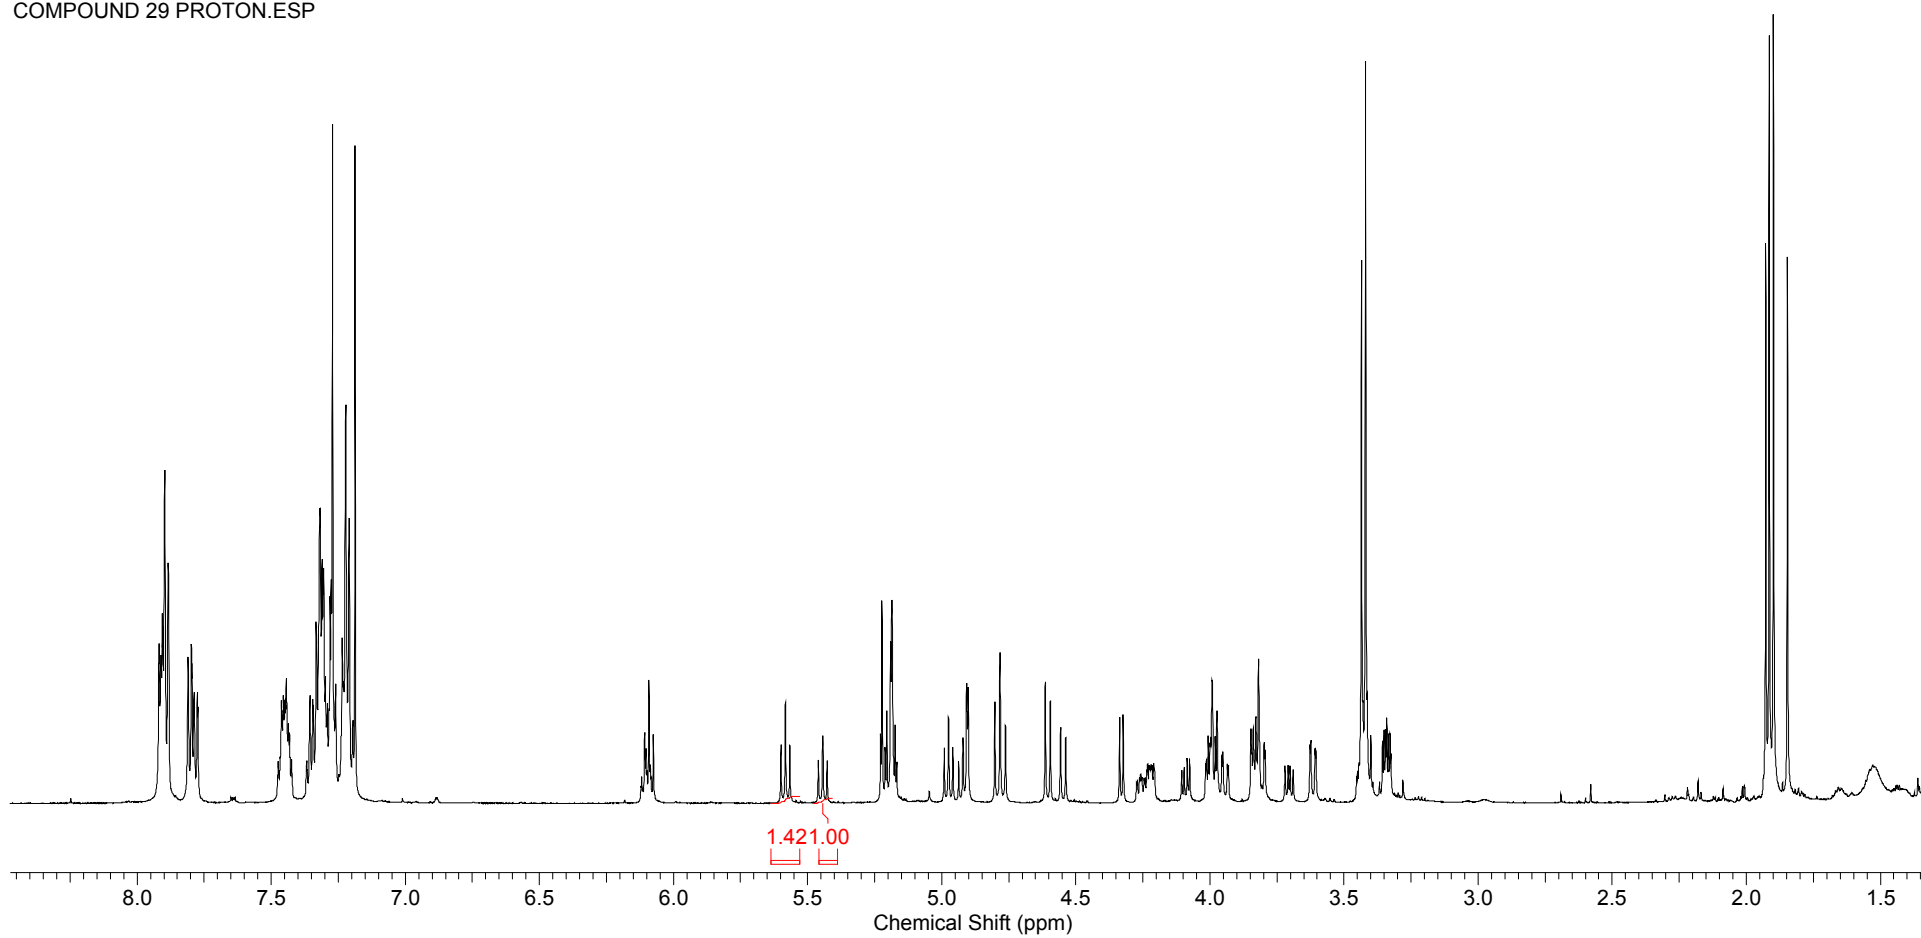

COMPOUND 29 CARBON.ESP

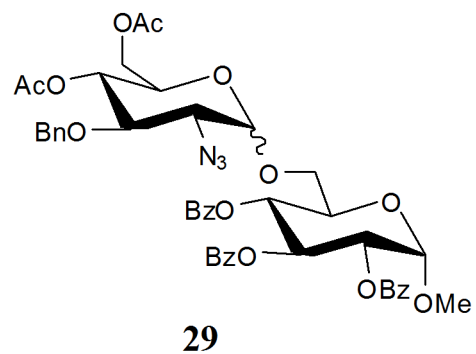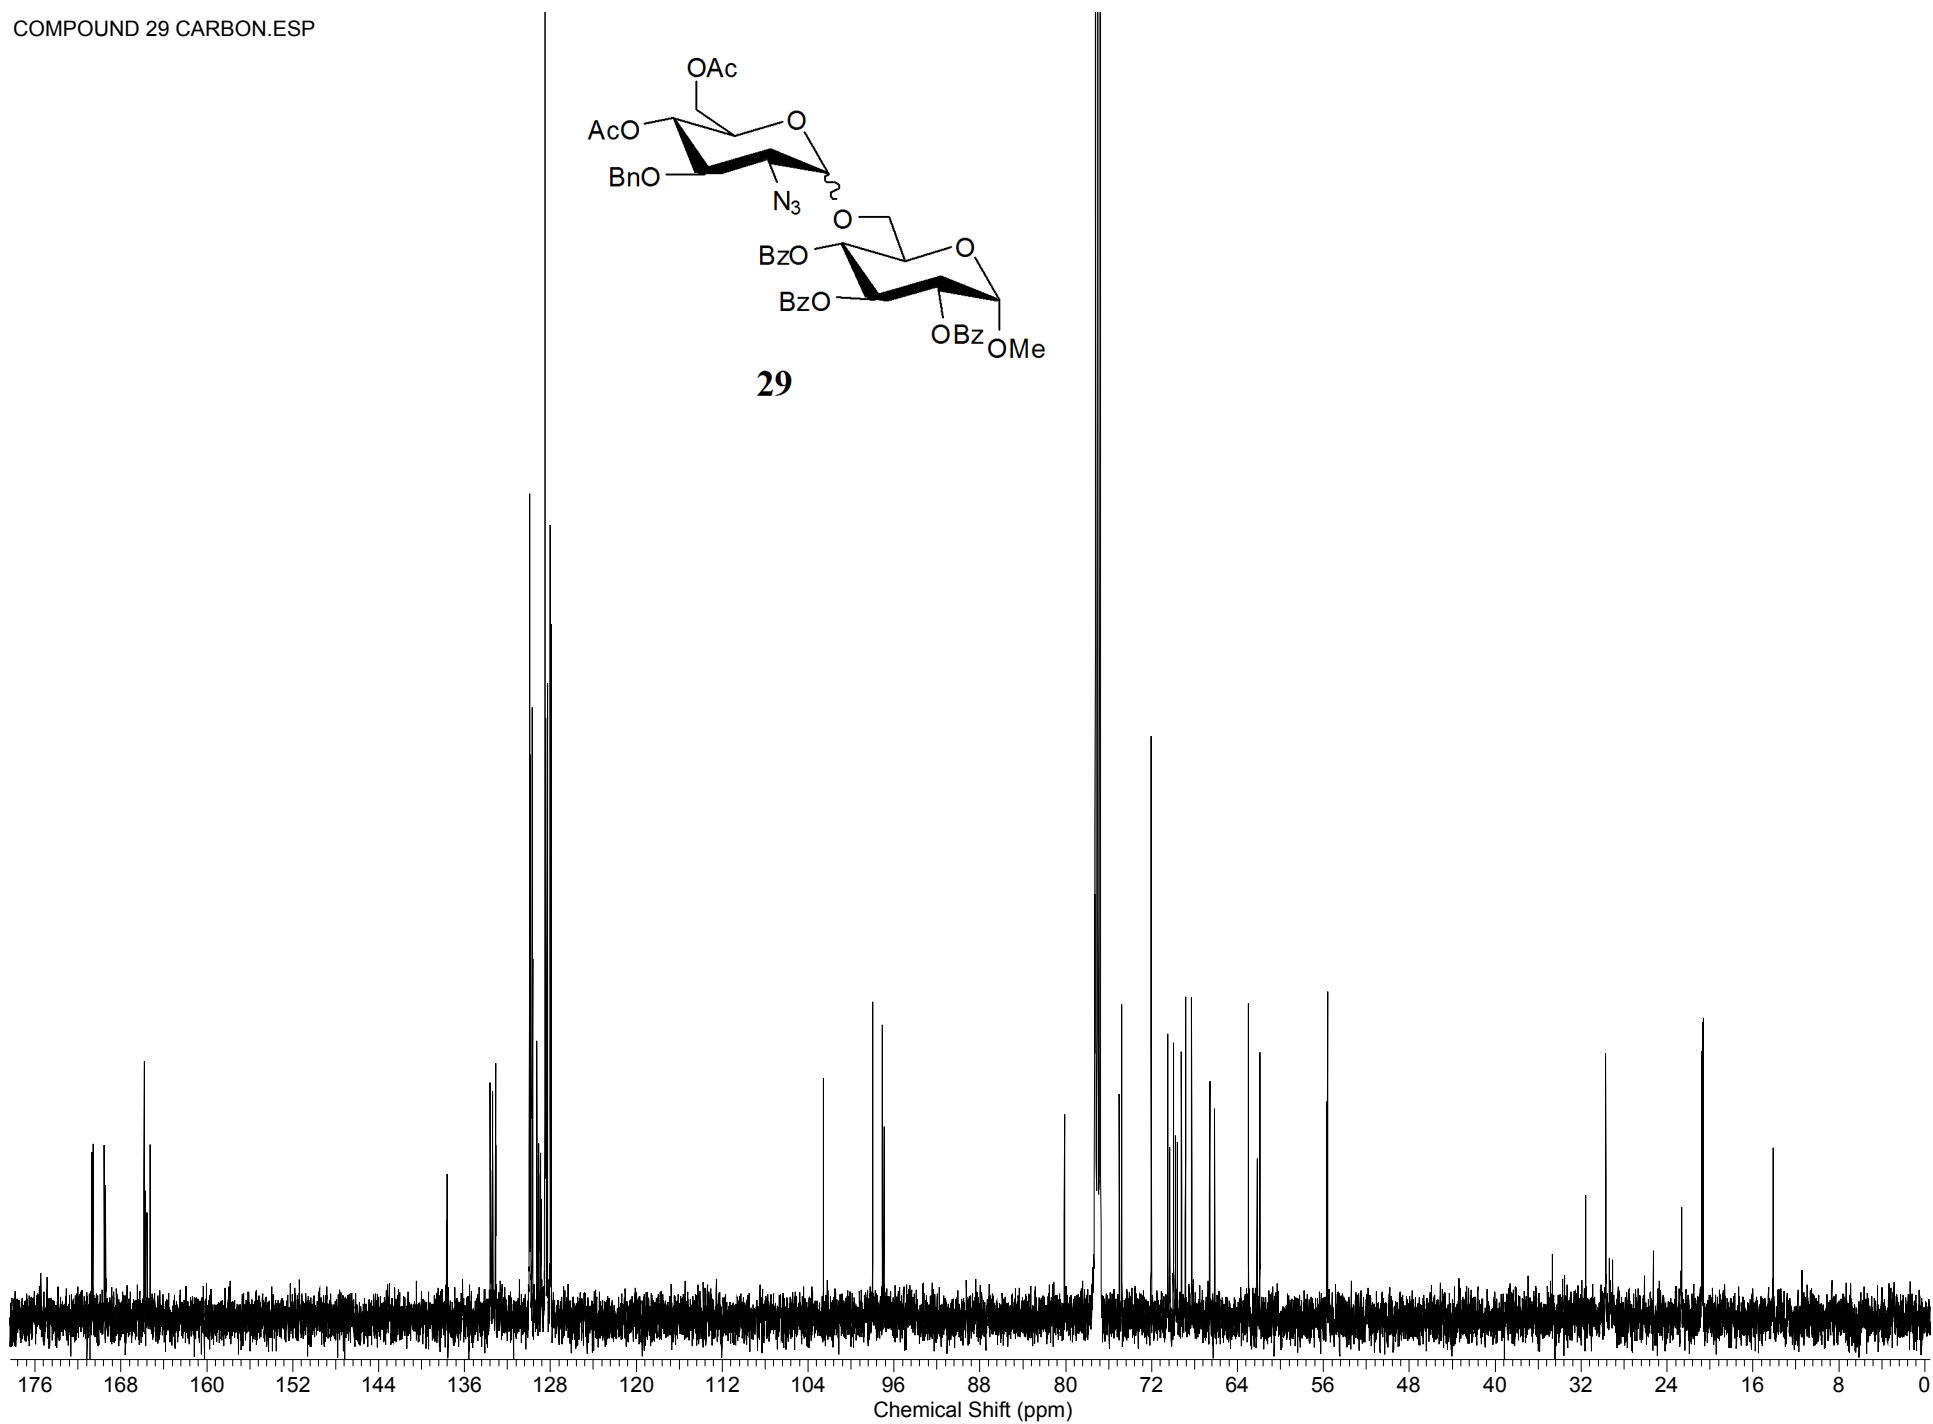

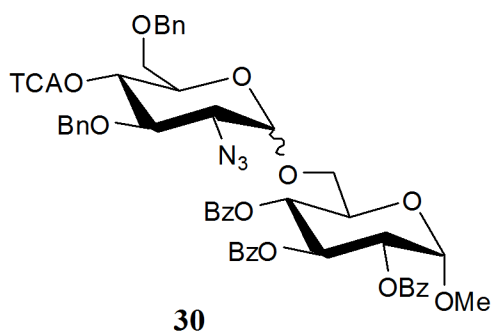

COMPOUND 30 PROTON.ESP

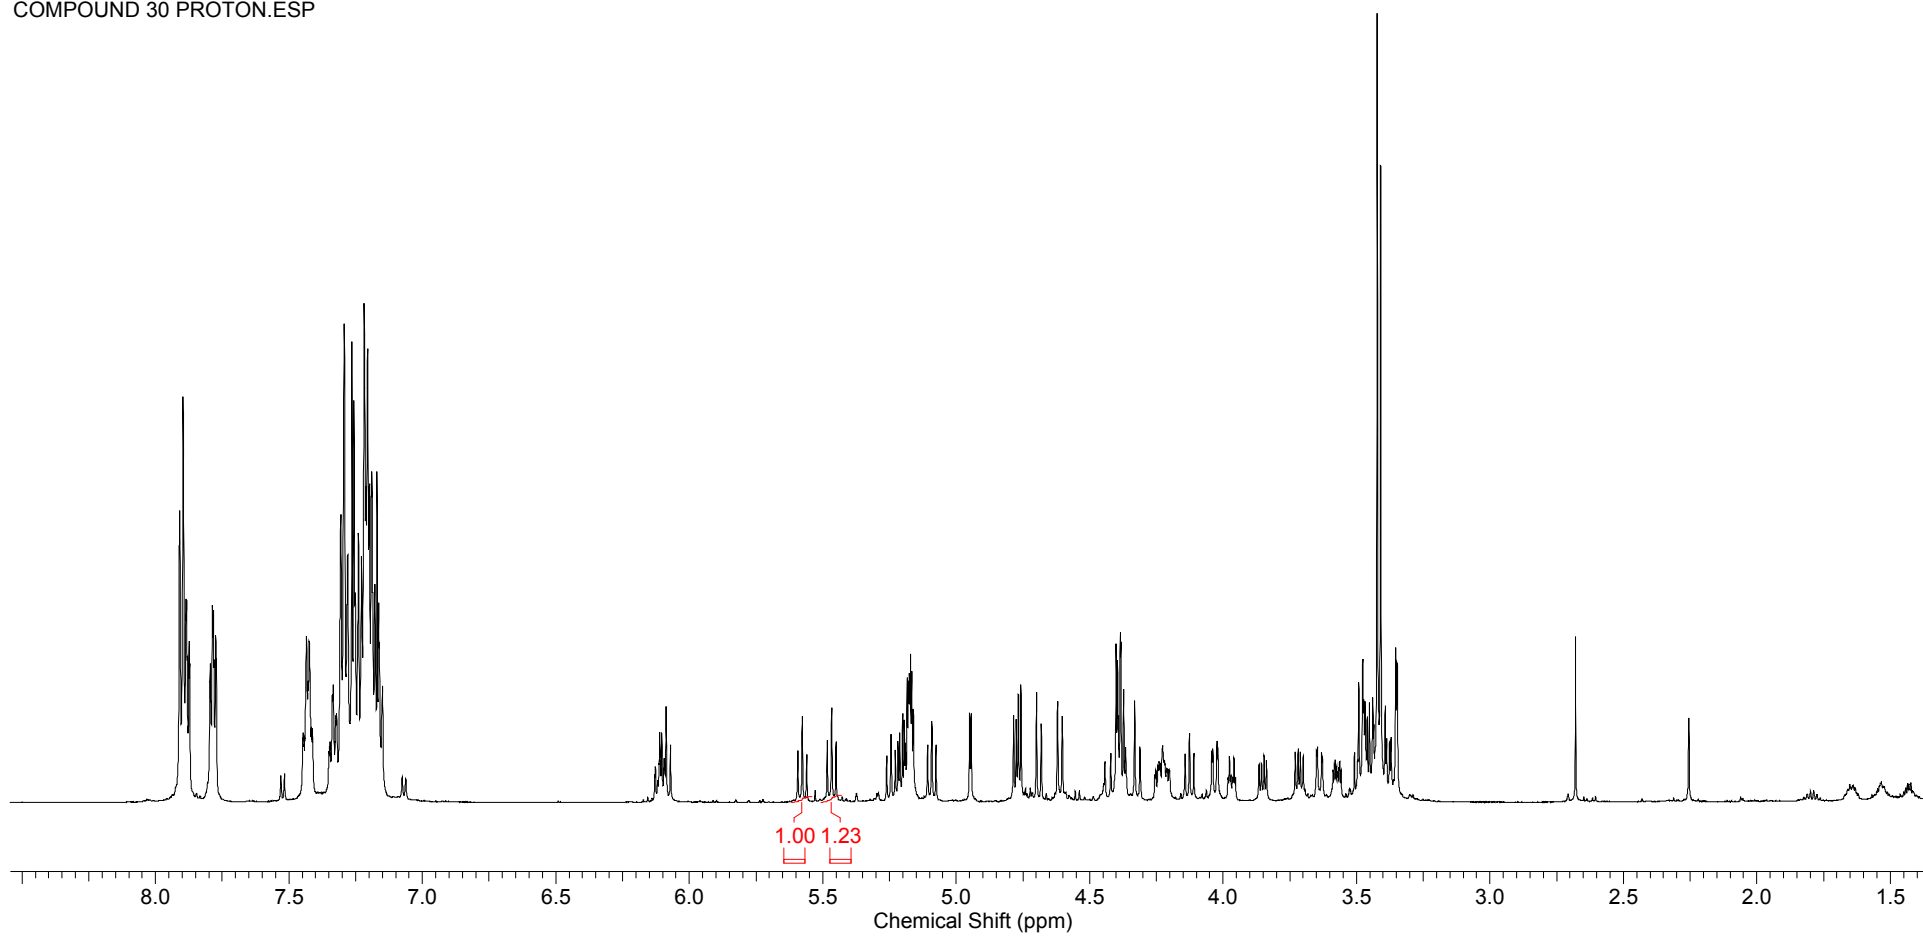

COMPOUND 30 CARBON.ESP

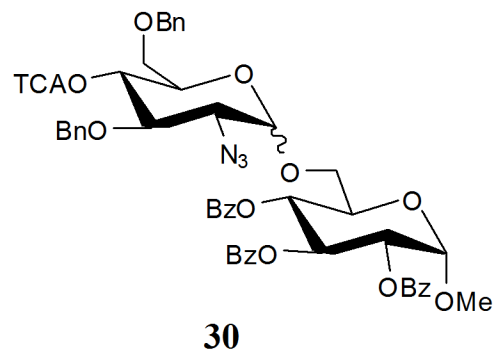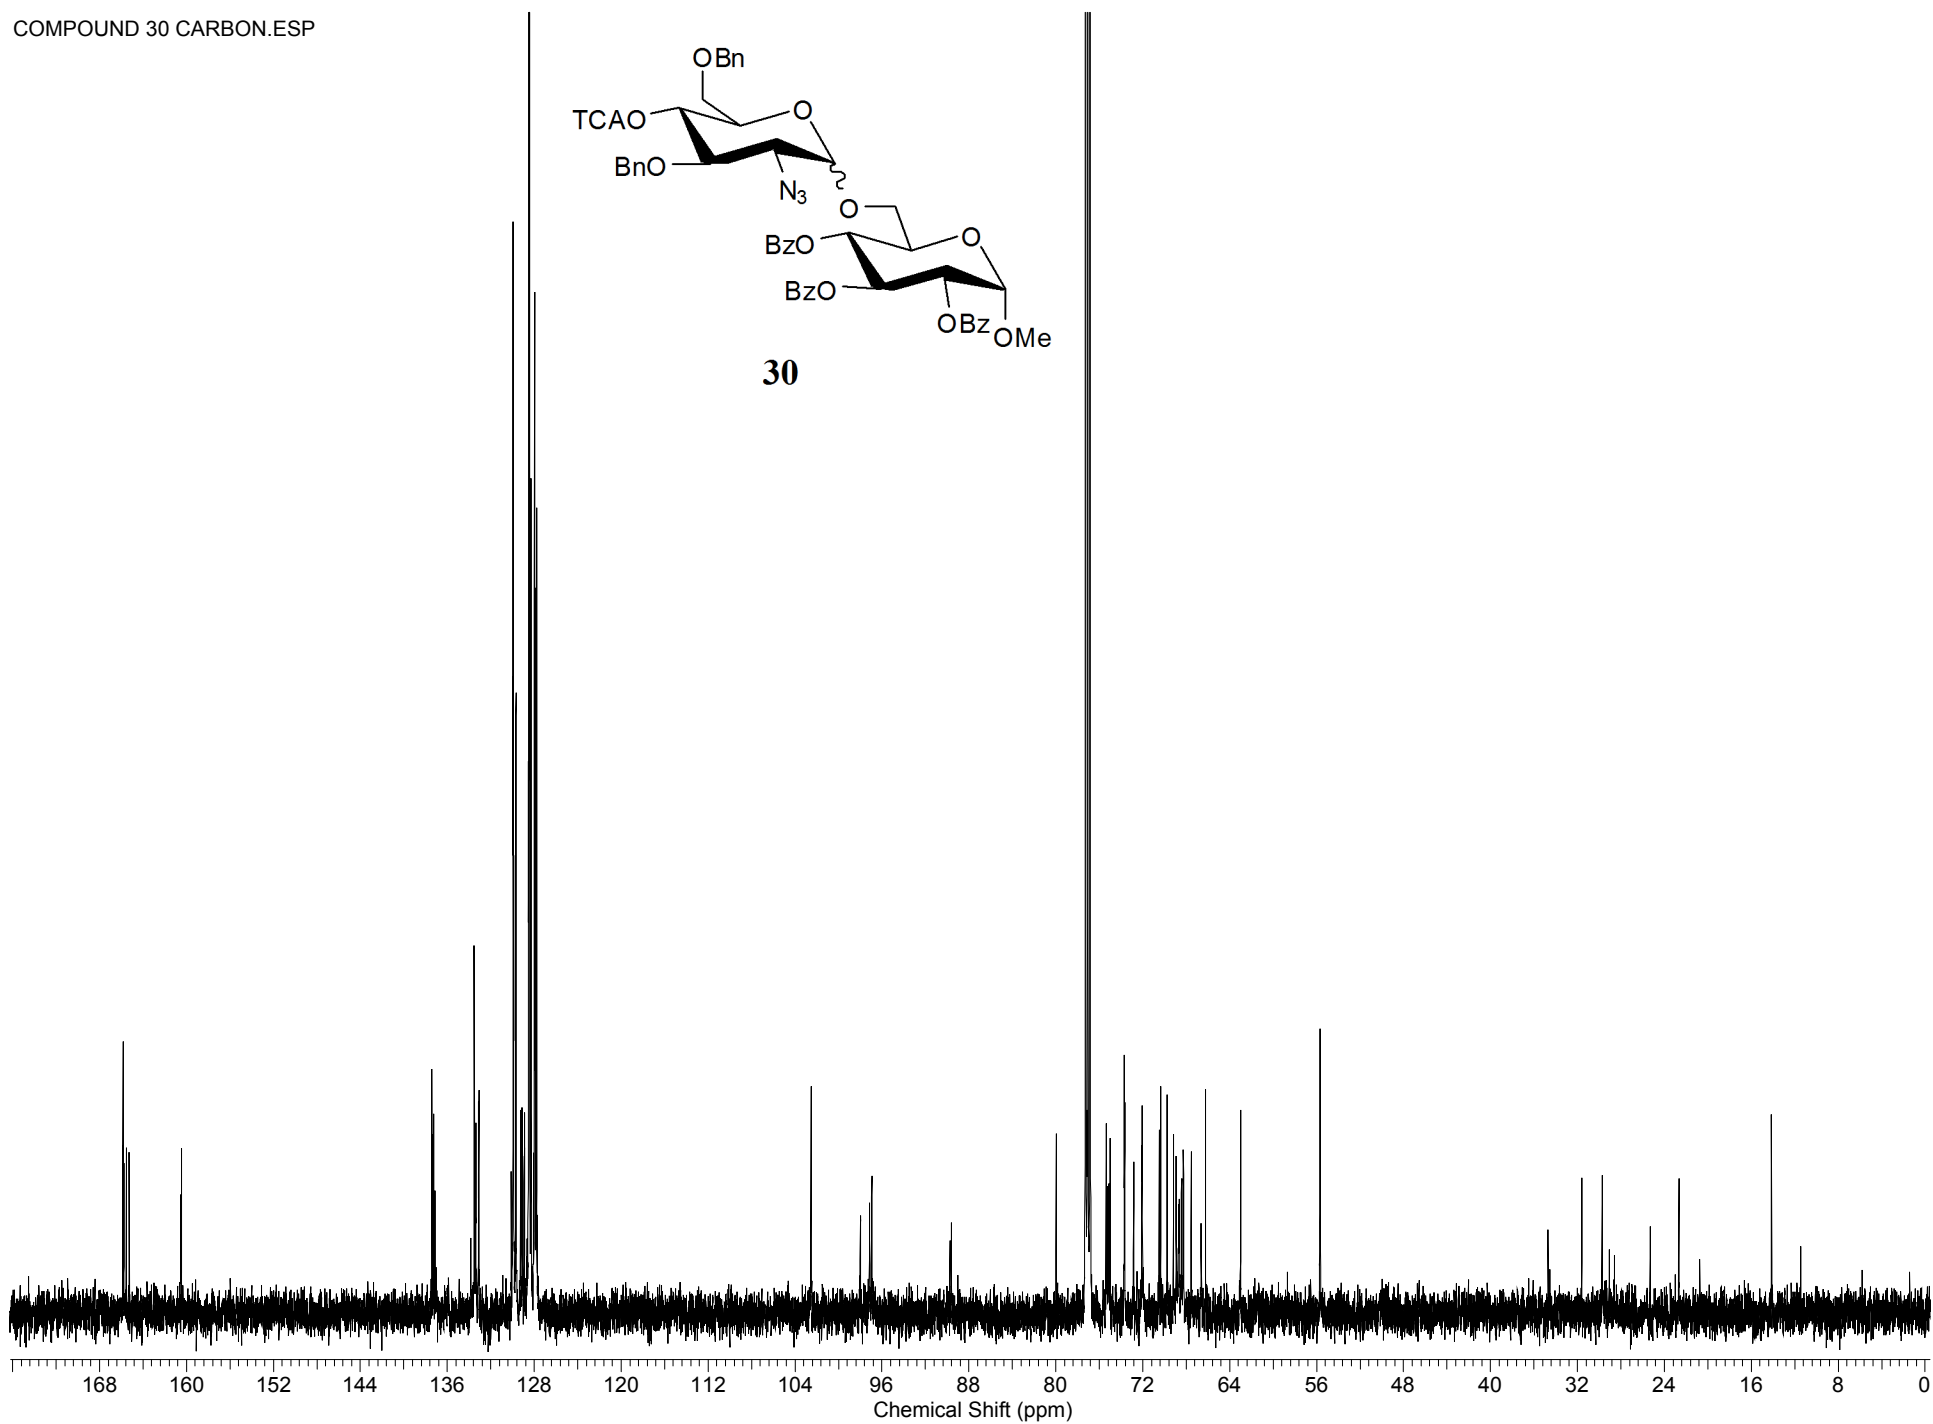

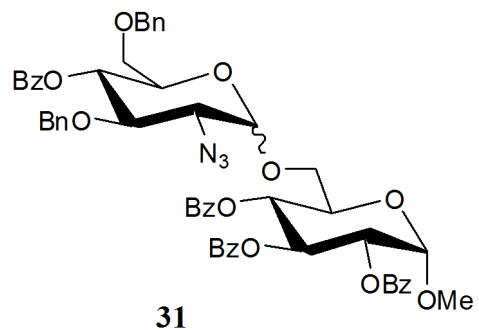

COMPOUND 31 PROTON.ESP

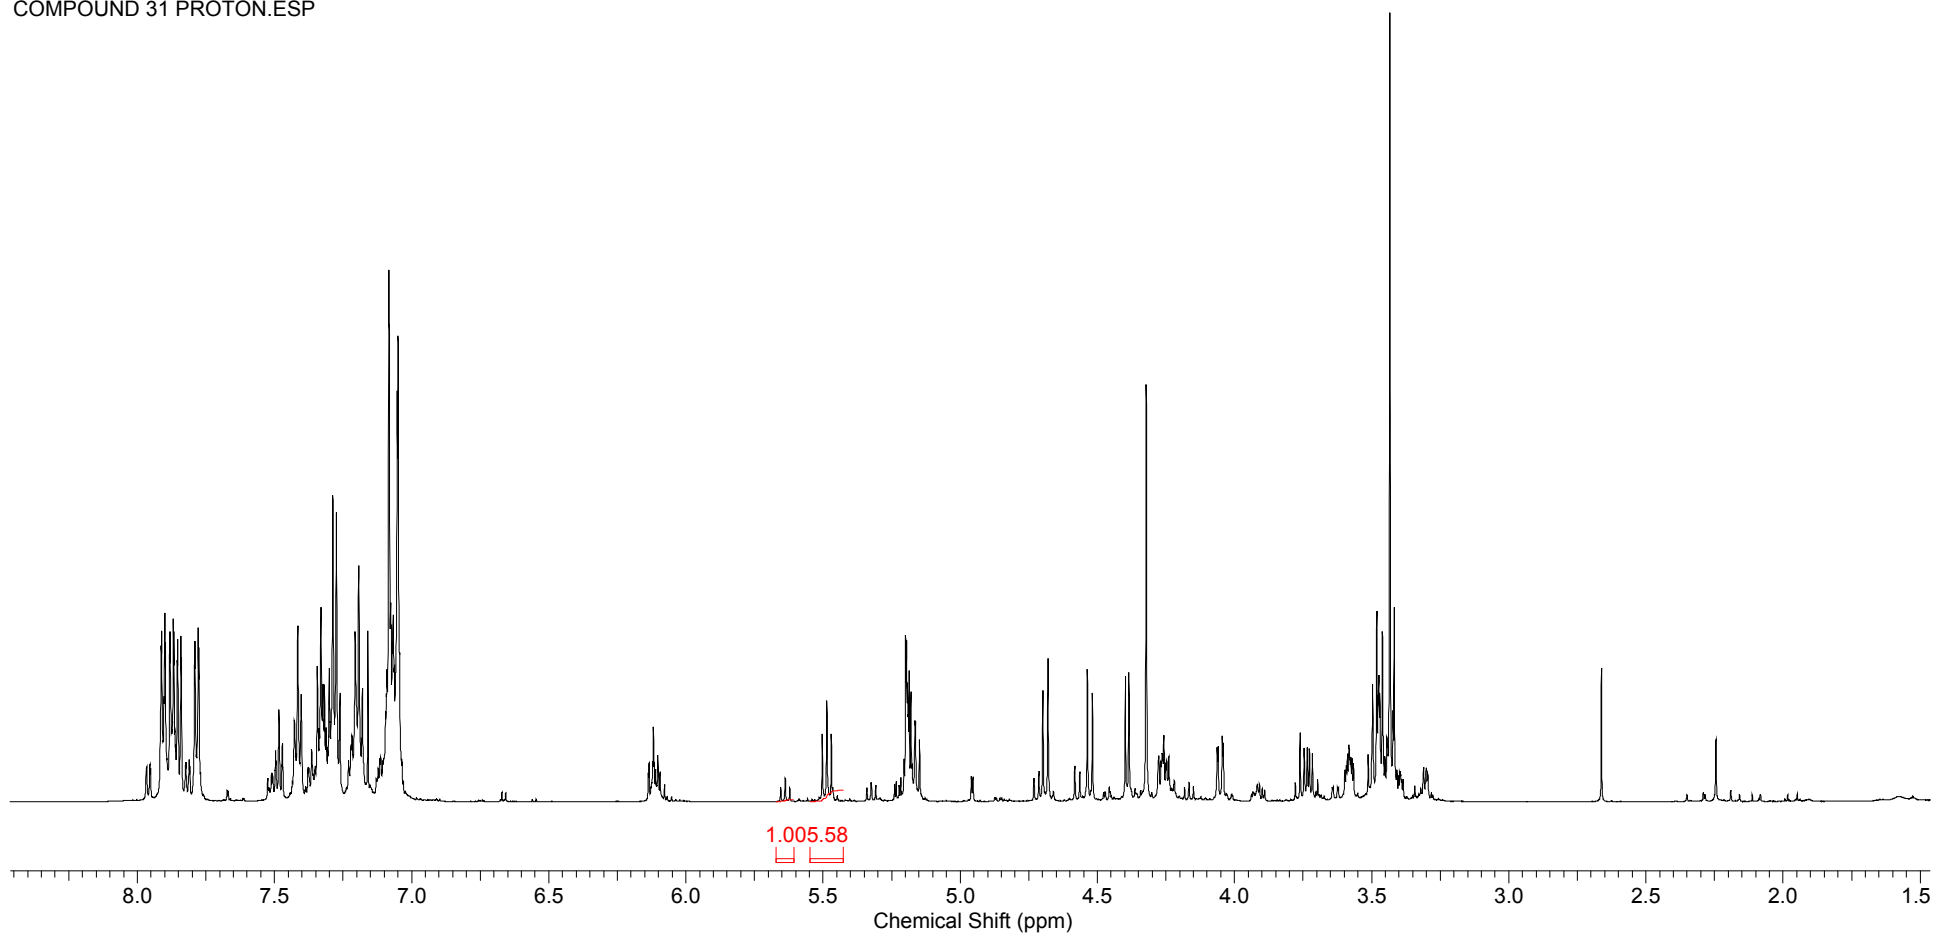

Compound 31 carbon.esp

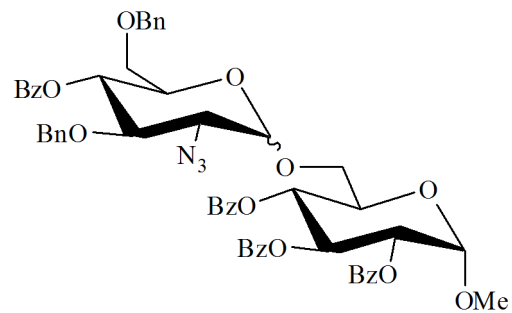

**31**

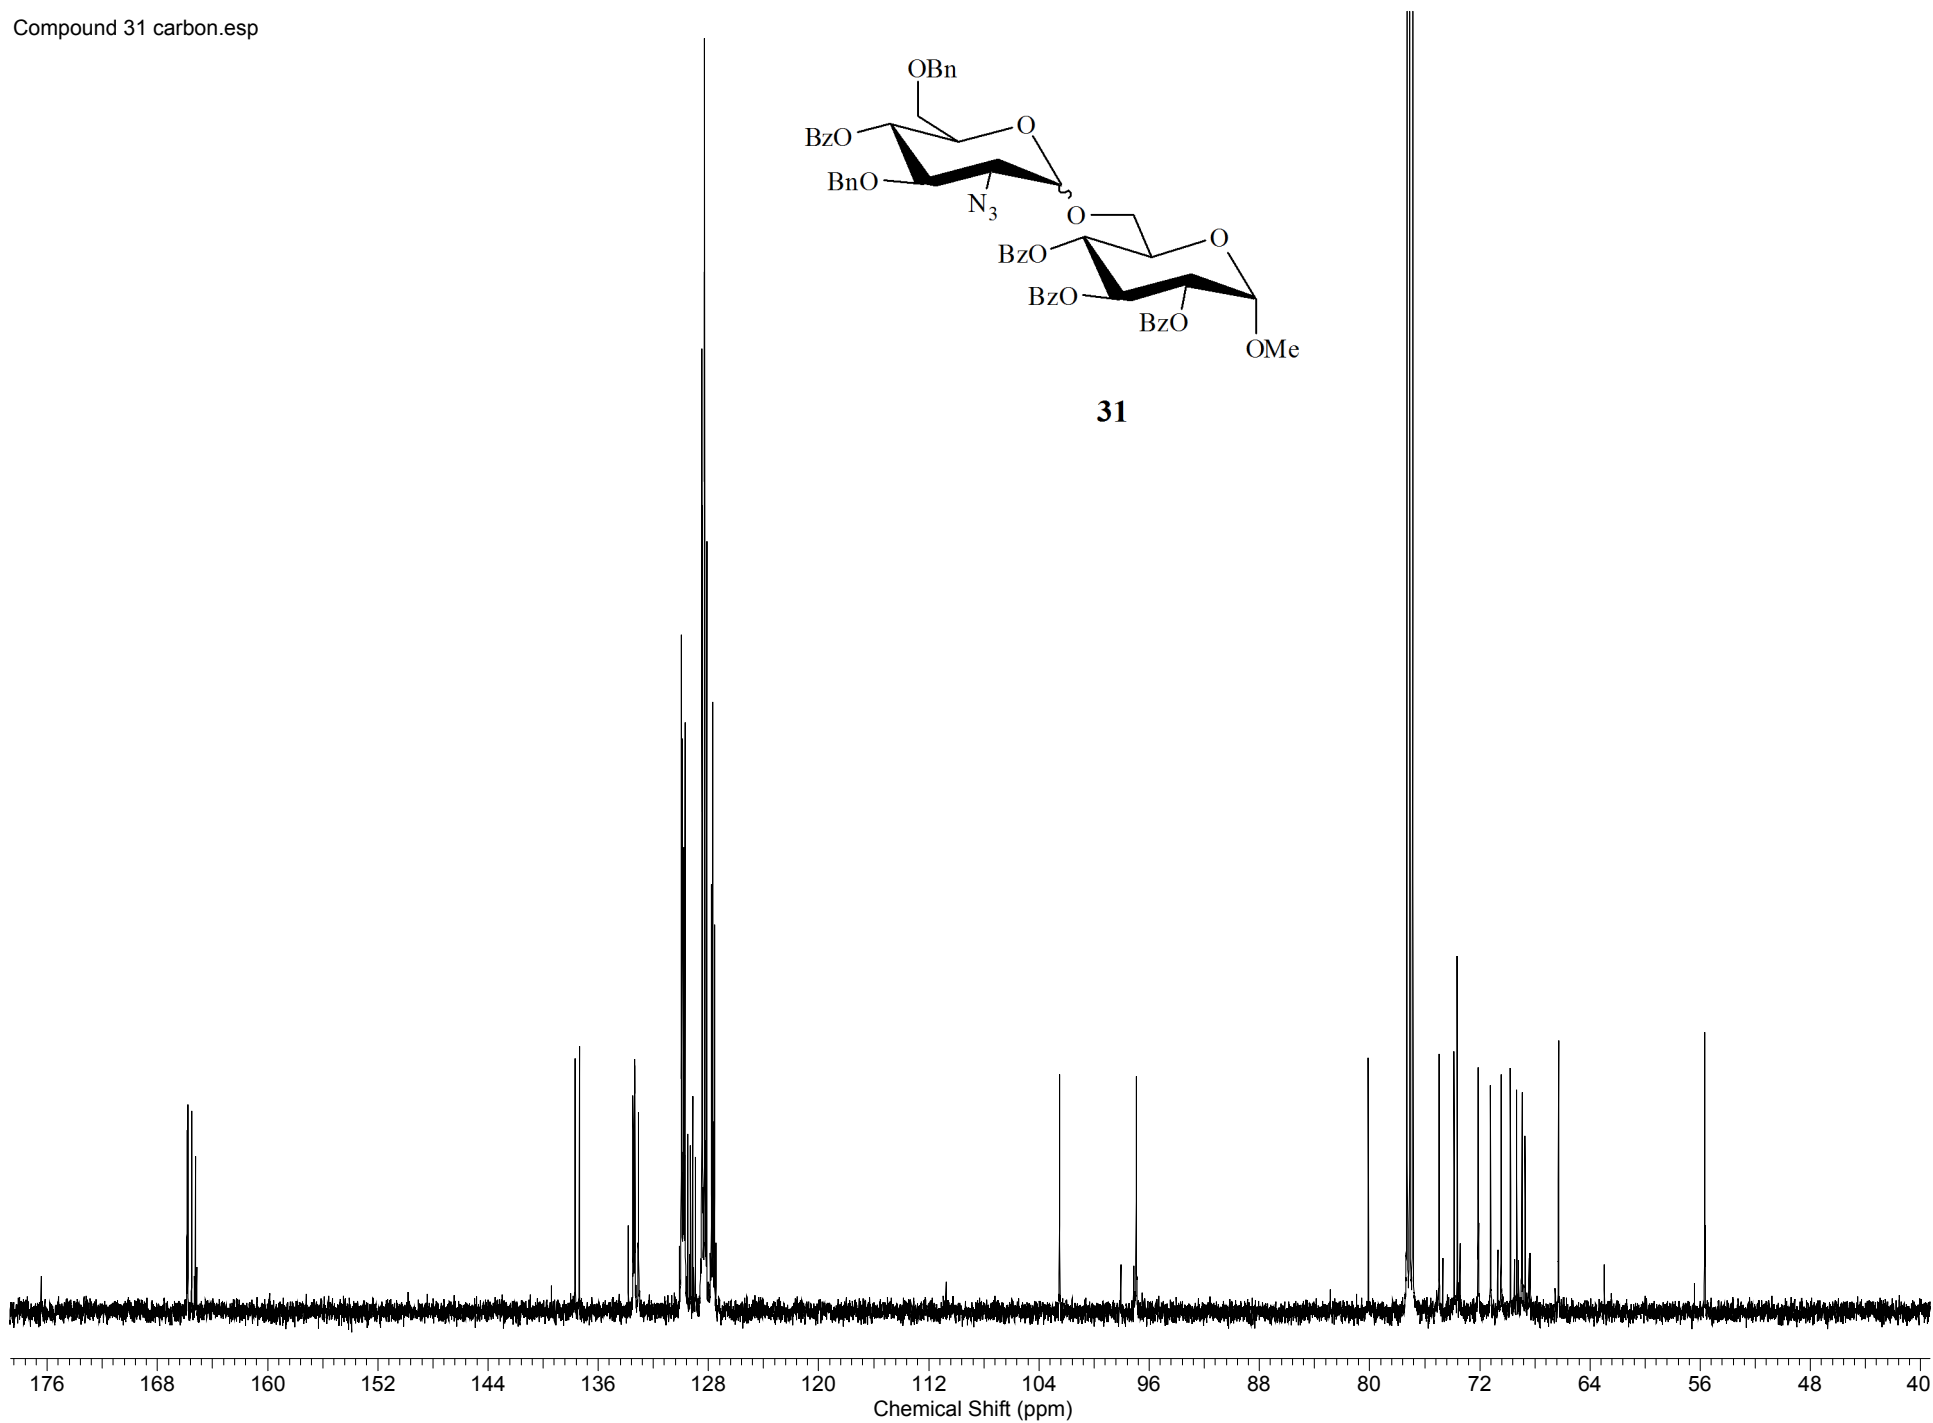

Supplement: c3ob26994a.pdf [file c3ob26994a.pdf]
